# Supplementary material for: Effect of medicines management versus standard care on readmissions in multimorbid patients: a randomised controlled trial
Source: PubMed Central journal article supplement — BMJ Open. 2020 Dec 29;10(12):e041558. doi: 10.1136/bmjopen-2020-041558 (PMC7778779; doi:10.1136/bmjopen-2020-041558), 2020-12-29
Supplement: bmjopen-2020-041558.draft_revisions.pdf [file bmjopen-2020-041558.draft_revisions.pdf]

# BMJ Open

BMJ Open is committed to open peer review. As part of this commitment we make the peer review history of every article we publish publicly available.

When an article is published we post the peer reviewers' comments and the authors' responses online. We also post the versions of the paper that were used during peer review. These are the versions that the peer review comments apply to.

The versions of the paper that follow are the versions that were submitted during the peer review process. They are not the versions of record or the final published versions. They should not be cited or distributed as the published version of this manuscript.

BMJ Open is an open access journal and the full, final, typeset and author-corrected version of record of the manuscript is available on our site with no access controls, subscription charges or pay-per-view fees (<http://bmjopen.bmj.com>).

If you have any questions on BMJ Open's open peer review process please email [info.bmjopen@bmj.com](mailto:info.bmjopen@bmj.com)

# BMJ Open

## Effect of medicines management versus standard care on readmissions in multimorbid patients: A randomized controlled trial

|                               |                                                                                                                                                                                                                                                                                                                                                                                                                                                                                                                                                                                                                                                                                                                                                                                                                                                                                                                                                                      |
|-------------------------------|----------------------------------------------------------------------------------------------------------------------------------------------------------------------------------------------------------------------------------------------------------------------------------------------------------------------------------------------------------------------------------------------------------------------------------------------------------------------------------------------------------------------------------------------------------------------------------------------------------------------------------------------------------------------------------------------------------------------------------------------------------------------------------------------------------------------------------------------------------------------------------------------------------------------------------------------------------------------|
| Journal:                      | <i>BMJ Open</i>                                                                                                                                                                                                                                                                                                                                                                                                                                                                                                                                                                                                                                                                                                                                                                                                                                                                                                                                                      |
| Manuscript ID                 | bmjopen-2020-041558                                                                                                                                                                                                                                                                                                                                                                                                                                                                                                                                                                                                                                                                                                                                                                                                                                                                                                                                                  |
| Article Type:                 | Original research                                                                                                                                                                                                                                                                                                                                                                                                                                                                                                                                                                                                                                                                                                                                                                                                                                                                                                                                                    |
| Date Submitted by the Author: | 11-Jun-2020                                                                                                                                                                                                                                                                                                                                                                                                                                                                                                                                                                                                                                                                                                                                                                                                                                                                                                                                                          |
| Complete List of Authors:     | Lea, Marianne; Hospital Pharmacies Enterprise, South Eastern Norway, Department of Pharmaceutical Services, Oslo Hospital Pharmacy Mowe, Morten; Oslo University Hospital, General Internal Medicine Ward, the Medical Clinic; University of Oslo Faculty of Medicine Molden, Espen; University of Oslo, Department of Pharmacy, Section for Pharmacology and Pharmaceutical Biosciences; Diakonhjemmet Hospital, Center for Psychopharmacology<br>Kvernørød, Kristin; Hospital Pharmacies Enterprise, South Eastern Norway, Department of Pharmaceutical Services, Oslo Hospital Pharmacy Skovlund, E; Norwegian University of Science and Technology, Department of Public Health and Nursing, Faculty of Medicine and Health Sciences<br>Mathiesen, Liv; Universitetet i Oslo Det Matematisk-naturvitenskapelige Fakultet, Department of Pharmacy, Section for Pharmacology and Pharmaceutical Biosciences,; Hospital Pharmacies Enterprise, South Eastern Norway |
| Keywords:                     | Quality in health care < HEALTH SERVICES ADMINISTRATION & MANAGEMENT, INTERNAL MEDICINE, PUBLIC HEALTH, THERAPEUTICS, CLINICAL PHARMACOLOGY                                                                                                                                                                                                                                                                                                                                                                                                                                                                                                                                                                                                                                                                                                                                                                                                                          |
|                               |                                                                                                                                                                                                                                                                                                                                                                                                                                                                                                                                                                                                                                                                                                                                                                                                                                                                                                                                                                      |

SCHOLARONE™  
Manuscripts

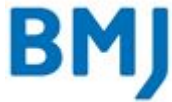

I, the Submitting Author has the right to grant and does grant on behalf of all authors of the Work (as defined in the below author licence), an exclusive licence and/or a non-exclusive licence for contributions from authors who are: i) UK Crown employees; ii) where BMJ has agreed a CC-BY licence shall apply, and/or iii) in accordance with the terms applicable for US Federal Government officers or employees acting as part of their official duties; on a worldwide, perpetual, irrevocable, royalty-free basis to BMJ Publishing Group Ltd ("BMJ") its licensees and where the relevant Journal is co-owned by BMJ to the co-owners of the Journal, to publish the Work in this journal and any other BMJ products and to exploit all rights, as set out in our [licence](#).

The Submitting Author accepts and understands that any supply made under these terms is made by BMJ to the Submitting Author unless you are acting as an employee on behalf of your employer or a postgraduate student of an affiliated institution which is paying any applicable article publishing charge ("APC") for Open Access articles. Where the Submitting Author wishes to make the Work available on an Open Access basis (and intends to pay the relevant APC), the terms of reuse of such Open Access shall be governed by a Creative Commons licence – details of these licences and which [Creative Commons](#) licence will apply to this Work are set out in our licence referred to above.

Other than as permitted in any relevant BMJ Author's Self Archiving Policies, I confirm this Work has not been accepted for publication elsewhere, is not being considered for publication elsewhere and does not duplicate material already published. I confirm all authors consent to publication of this Work and authorise the granting of this licence.

1  
2  
3 1 **TITLE PAGE**  
4  
5

6 2  
7  
8 3 **TITLE**  
9

10 4 Effect of medicines management versus standard care on readmissions in  
11 5 multimorbid patients: A randomized controlled trial  
12  
13 6  
14  
15 7  
16  
17 8  
18

19 9 **AUTHORS**

20  
21 10 Marianne Lea\* (PhD)<sup>1</sup>, Morten Mowe (PhD)<sup>2,3</sup>, Espen Molden (PhD)<sup>4,5</sup>, Kristin Kvernørød (MSc)<sup>1</sup>, Eva  
22 11 Skovlund (PhD)<sup>6</sup> and Liv Mathiesen (PhD)<sup>5,7</sup>  
23

24 12 <sup>1</sup> Department of Pharmaceutical Services, Oslo Hospital Pharmacy, Hospital Pharmacies Enterprise,  
25 13 South Eastern Norway, Oslo, Norway

26  
27 14 <sup>2</sup> General Internal Medicine Ward, the Medical Clinic, Oslo University Hospital, Oslo, Norway

28  
29 15 <sup>3</sup> Faculty of Medicine, University of Oslo, Oslo, Norway

30  
31 16 <sup>4</sup> Center for Psychopharmacology, Diakonhjemmet Hospital, Oslo, Norway

32  
33 17 <sup>5</sup> Department of Pharmacy, Section for Pharmacology and Pharmaceutical Biosciences, University of  
34 18 Oslo, Oslo, Norway

35  
36 19 <sup>6</sup> Department of Public Health and Nursing, Faculty of Medicine and Health Sciences, Norwegian  
37 20 University of Science and Technology, NTNU, Trondheim, Norway

38  
39 21 <sup>7</sup> Hospital Pharmacies Enterprise, South Eastern Norway, Oslo, Norway  
40

41 22  
42  
43 23 \*Corresponding author

44 24 *Address:* Department of Pharmaceutical Services, Oslo Hospital Pharmacy, Kirkeveien 166, 0450 Oslo,  
45 25 Norway

46  
47 26 *Phone:* + 47- 23 20 52 94

48  
49 27 E-mail: [marianne.lea@sykehusapotekene.no](mailto:marianne.lea@sykehusapotekene.no)  
50

51 28  
52  
53 29  
54  
55 30 **WORD COUNT:** 3698  
56

57 31  
58  
59 32 **CATEGORY:** Original research  
60

1  
2  
3 **33 ABSTRACT**  
4

5 **34 Objective:** To investigate the effect of pharmacist-led medicines management in  
6  
7  
8 **35** multimorbid, hospitalized patients on long-term hospital readmissions and survival.  
9

10  
11 **36 Design:** Parallel-group, randomized controlled trial.  
12

13  
14 **37 Setting:** Recruitment from an internal medicine hospital ward in Oslo, Norway. Patients were  
15  
16 **38** enrolled consecutively from August 2014 until the predetermined target number of 400  
17  
18 **39** patients. The last participant was enrolled March 2016. Follow-up until December 31, 2017,  
19  
20 **40** i.e. 21-40 months.  
21  
22

23  
24 **41 Participants:** Acutely admitted multimorbid patients  $\geq 18$  years, using minimum four regular  
25  
26 **42** drugs from minimum two therapeutic classes. 399 patients were randomly assigned, 1:1, to  
27  
28 **43** the intervention or control group. After excluding 11 patients dying in-hospital and 2  
29  
30 **44** erroneously included, the primary analysis comprised 386 patients (193 in each group) with  
31  
32 **45** median age 79 years (range 23-96) and number of diseases 7 (range 2-17).  
33  
34  
35  
36

37 **46 Intervention:** Intervention patients received pharmacist-led medicines management  
38  
39 **47** comprising medicines reconciliation at admission, repeated medicines reviews throughout  
40  
41 **48** the stay and medicines reconciliation and tailored information at discharge, according to the  
42  
43 **49** Integrated Medicines Management (IMM) model. Control patients received standard care.  
44  
45  
46

47 **50 Primary and secondary outcome measures:** The primary endpoint was difference in time to  
48  
49 **51** readmission or death within 12 months. Overall survival was a priori the clinically most  
50  
51 **52** important secondary endpoint.  
52  
53

54 **53 Results:** The pharmacist-led medicines management had no significant effect on time to  
55  
56 **54** readmission or death within 12 months after discharge (median 116 versus 184 days, HR  
57  
58  
59  
60

1  
2  
3 55 0.82, 95% CI 0.64 to 1.04, p=0.106). A statistically significantly increased overall survival was  
4  
5  
6 56 observed (HR 0.66, 95% CI 0.48 to 0.90, p=0.008).  
7

8  
9 57 **Conclusions:** Pharmacist-led medicines management to multimorbid patients had no  
10  
11 58 statistically significant effect on time until readmission or death. A statistically significant  
12  
13 59 increased overall survival was seen. Further studies should be conducted to investigate the  
14  
15  
16 60 effect of such an intervention on a larger scale.  
17

18  
19 61 **Trial Registration:** ClinicalTrials.gov-Identifier:NCT02336113. The trial is closed for new  
20  
21 62 participants.  
22  
23

24  
25 63

26  
27  
28 64

## 29 30 31 65 **ARTICLE SUMMARY**

### 32 33 34 66 **Strengths and limitations of this study**

- 35  
36  
37 67 • Randomized controlled design, blinded on the steps possible to blind  
38  
39 68 • Included almost 200 high-risk multimorbid patients in each group and followed them  
40  
41  
42 69 for 20-41 months  
43  
44 70 • Hard endpoints, readmissions and mortality, collected from national registers  
45  
46  
47 71 • Inclusion from a single hospital in Norway  
48  
49 72 • Spill-over effect may have reduced the effect estimate  
50  
51

52 73

53  
54  
55 74 **KEYWORDS:** multimorbid patients, integrated medicines management, pharmacist-led,  
56  
57 75 internal medicine, hospital readmissions, survival  
58  
59  
60

## 76 INTRODUCTION

77 Increased life expectancy and steadily improving healthcare contribute to a growing  
78 subpopulation of multimorbid patients, commonly defined as having minimum two  
79 conditions.[1-3] The prevalence of multimorbidity is reported to be 20-30% in the general  
80 population, 55-98% in the elderly and 22-65% in hospitalized patients.[4-6] Multimorbidity is  
81 associated with the use of multiple drugs, increased use of healthcare services and reduced  
82 life expectancy.[3, 7-9] The organization of healthcare services and treatment guidelines is  
83 however mainly focused on single diagnoses, while coexisting diagnoses or use of multiple  
84 drugs are rarely taken into account.[10, 11] Studying the care of multimorbid patients is  
85 crucial to managing the future global challenge of ensuring safe, effective and evidence-  
86 based care to these patients.[1, 11, 12]

87 Multimorbid patients using numerous drugs are at high risk of harm by drug-related  
88 problems (DRPs).[13, 14] DRPs are reported to cause 10-30% of all hospital admissions,  
89 whereof a high proportion is preventable.[15-17] Drugs also cause problems during the  
90 hospital stay[18, 19], which pose a risk of readmissions.[20, 21] A recent Cochrane review  
91 found no evidence that medicines reviews reduce hospital readmissions or mortality.[22]  
92 The authors state that important effects may have been overlooked due to short follow-up  
93 in included studies, and request high-quality studies with long follow-up in high-risk patient  
94 populations.[22]

95 The Integrated Medicines Management (IMM) model has been established as a tool for  
96 clinical pharmacists to optimize and individualize drug therapy.[23] IMM comprises a  
97 systematic approach to ensure high quality of the use of drugs throughout the hospital stay,  
98 comprising a three-step procedure, i.e. medicines reconciliation at admission, medicines

1  
2  
3 99 reviews during the stay and medicines reconciliation and -information at discharge.[23-27]  
4  
5  
6 100 Nevertheless, only a very limited number of clinical pharmacists are working in Norwegian  
7  
8 101 hospitals, hence standard care for hospitalized patients does not include IMM or other  
9  
10 102 services by clinical pharmacists. Several studies have investigated the effect of implementing  
11  
12 103 either parts of, or the complete IMM model on different efficacy measures[23-25, 28], but to  
13  
14 104 our knowledge, not in multimorbid patients. The objective of the present study was to  
15  
16 105 investigate the effect of pharmacist-led medicines management in multimorbid, hospitalized  
17  
18 106 patients on long-term hospital readmissions and survival.  
19  
20  
21  
22

## 23 107 **MATERIALS AND METHODS**

### 24 25 26 108 **Study Design**

27  
28  
29  
30 109 This parallel-group, randomized controlled trial, approved by the Regional Committee for  
31  
32 110 Medical and Health Research Ethics (2014/704/REK south-eastern D) and the Privacy  
33  
34 111 Ombudsman, was conducted at the internal medicine ward, Oslo University hospital  
35  
36 112 (Ullevaal), Norway. The ward comprised 24 beds and mainly received patients with multiple  
37  
38 113 medical issues, in particular hematological, endocrine, infectious and/or cardiovascular.  
39  
40 114 Patients were considered for inclusion Monday to Friday during regular daytime working  
41  
42 115 hours, from August 30, 2014, until the predetermined target number of 400 patients was  
43  
44 116 enrolled. Eligible patients were prospectively invited and enrolled in the study following  
45  
46 117 written informed consent. S1 Appendix shows the original trial protocol, protocol  
47  
48 118 amendments, the statistical analysis plan and the timeline of the study with the milestones.  
49  
50 119 Figure 1 gives a graphical depiction of the study design, as suggested for studies of complex  
51  
52 120 interventions.[29]  
53  
54  
55  
56  
57  
58  
59  
60



1  
2  
3 121 The trial was registered in ClinicalTrials.gov, identifier: NCT02336113, in June 2014. Due to a  
4  
5 122 minor Protocol Registration and Results System (PRS) review comment, the trial was first  
6  
7  
8 123 published on their website in January 2015. A clarification that readmission data were to be  
9  
10 124 harvested from the Norwegian Patient Registry, was the only addition to the original  
11  
12  
13 125 registration. The trial is closed for new participants.

## 16 126 **Participants**

17  
18  
19 127 Inclusion criteria were: acute admission, age  $\geq 18$  years and use of at least four regular drugs  
20  
21 128 from minimum two therapy classes (Anatomical Therapeutic Chemical (ATC)[30] at 1st level)  
22  
23  
24 129 at admission. The latter was chosen as the preferred multimorbidity measure[31], as drug  
25  
26 130 counts were considered more reliable than disease counts in the acute hospital admission  
27  
28  
29 131 setting. Exclusion criteria were i) terminally ill, ii) isolated due to severe infections or iii)  
30  
31 132 unable to communicate in Norwegian or English and no translator available. Patients  
32  
33  
34 133 readmitted during the study period were not invited for 'a second' inclusion.

## 37 134 **Randomization and blinding**

38  
39  
40 135 The patients were randomized 1:1 to the intervention or control group. Centre for  
41  
42 136 Biostatistics and Epidemiology, Oslo University Hospital, was responsible for the  
43  
44  
45 137 randomization procedure. Their staff had no contact with patients, study pharmacists or  
46  
47 138 ward staff. A random number generator program and a permuted block design were used to  
48  
49  
50 139 generate the randomization sequence, which was delivered to the study pharmacists in  
51  
52 140 sequentially numbered, opaque, sealed envelopes. The investigators were blinded to block  
53  
54  
55 141 size, which was randomly varied. Randomization took place following patient inclusion and  
56  
57 142 baseline assessments. A study pharmacist assigned the envelope with the lowest number to  
58  
59 143 the individual participant and signed the allocation before the envelope was opened.

1  
2  
3 144 It was neither feasible to blind participants nor study pharmacists to the allocation. It was  
4  
5  
6 145 also known by ward staff which patients belonged to the intervention group. Ward staff was,  
7  
8 146 however, unable to distinguish between patients randomized to the control group and  
9  
10 147 patients not participating in the trial. The primary endpoint analysis was conducted on a  
11  
12 148 blinded dataset (by researchers who did not see patients). The staff providing outcome data  
13  
14 149 were not involved in data collection or preparation of data files and were blinded to group  
15  
16 150 allocation.

### 21 151 **Data collection and baseline assessments**

22  
23  
24 152 During the inclusion period, six clinical pharmacists, all with a master`s degree in clinical  
25  
26 153 pharmacy and standardized training in IMM, collected data, conducted baseline assessments  
27  
28 154 and provided the various steps of the intervention. All steps were standardized using  
29  
30 155 translated IMM procedures adapted to the Norwegian hospital setting.[23-27, 32] A DRP was  
31  
32 156 defined according to the Pharmaceutical Care Network Europe (PCNE) as *“an event or*  
33  
34 157 *circumstance involving drug therapy that actually or potentially interferes with desired*  
35  
36 158 *health outcomes”*.[33]

37  
38  
39 159 Blood samples were collected for biochemical analyses. Glomerular filtration rate (GFR) was  
40  
41 160 calculated using the Cockcroft-Gault formula[34], except for obese patients (body-mass  
42  
43 161 index > 30), for whom the Salazar-Corcoran formula was used.[35] An experienced senior  
44  
45 162 physician retrospectively collected information from medical records to calculate the  
46  
47 163 Charlson Comorbidity Index (CCI) score.[36]

48  
49 164 Before allocation, baseline assessments were conducted for all included patients, comprising  
50  
51 165 medicines reconciliation and review. These medicines reviews included only drugs used prior  
52  
53 166 to admission, not drugs initiated during transport, or following hospital admission. The

1  
2  
3 167 pharmacists had access to the patient's medical history and laboratory results up to and  
4  
5  
6 168 including admission time. All medicines discrepancies, i.e. mismatches between the  
7  
8 169 reconciled drug list and the list recorded at hospital admission, and DRPs revealed were  
9  
10 170 registered in the research database, however not systematically discussed in the  
11  
12  
13 171 multidisciplinary treatment team. Before allocation, the study pharmacist assessed whether  
14  
15 172 any medicines discrepancy or DRP could result in irreversible detrimental effects or death if  
16  
17  
18 173 not handled immediately. If the patient was allocated to the control group, any such issue  
19  
20 174 was discussed with a senior physician (MM) who decided whether it was necessary to  
21  
22  
23 175 intervene.

#### 24 25 26 176 **The intervention group – in-hospital pharmacist-led medicines management**

27  
28  
29 177 The thorough intervention implied the inclusion of clinical pharmacist(s) in the patients`  
30  
31 178 multidisciplinary treatment team throughout the hospital stay, working in close  
32  
33  
34 179 collaboration with the patient, physicians and other members of the team, as shown in  
35  
36 180 Figure 1. The medicines management process can be divided into three parts covering the  
37  
38 181 patients` hospital stay; medicines reconciliation at admission, medicines review repeatedly  
39  
40  
41 182 during the entire stay and medicines reconciliation and tailored information at  
42  
43  
44 183 discharge.[23-27] Medicines reviews were performed at admission and repeatedly as  
45  
46 184 needed due to changes in either prescription, patient symptoms, clinical state, and/or  
47  
48 185 laboratory values. Patients were reviewed for such changes daily, Monday to Friday, during  
49  
50  
51 186 regular daytime working hours.  
52  
53 187 During medicines reviews, a list of pre-defined risk categories, all described in detail in Table  
54  
55  
56 188 1, were systematically addressed for each drug in each patient. Furthermore, an overall  
57  
58 189 benefit-risk assessment was made with the main goal of tailoring drug therapy to the  
59  
60

1  
2  
3 190 individual participant, giving significant weight to the patient perspective. Medicines  
4  
5  
6 191 discrepancies and DRPs revealed during both baseline assessments and the hospital stay  
7  
8 192 were were discussed in the multidisciplinary treatment team. At discharge, a medicines  
9  
10 193 reconciliation was conducted, followed by written and oral information tailored to the  
11  
12  
13 194 patient's further needs of care, provided to the patient and/or next care provider, see Figure  
14  
15 195 1. The main goals of this step were to answer drug questions, to ensure continuous  
16  
17  
18 196 treatment, to increase adherence, and to provide the patient and/or next care provider a  
19  
20 197 complete overview of all drugs.  
21  
22

23 198  
24  
25  
26  
27  
28  
29  
30  
31  
32  
33  
34  
35  
36  
37  
38  
39  
40  
41  
42  
43  
44  
45  
46  
47  
48  
49  
50  
51  
52  
53  
54  
55  
56  
57  
58  
59  
60

199 **Table 1.** Detailed description of the risk categories that were systematically addressed for each drug  
 200 in each patient during the medicines reviews, and examples of sources used by clinical pharmacists  
 201 to address them.

| Risk category                             | Detailed description                                                                                                              | Examples of sources                                                                                                                                                                                                                                                                                                                                                                                                                                                                     |
|-------------------------------------------|-----------------------------------------------------------------------------------------------------------------------------------|-----------------------------------------------------------------------------------------------------------------------------------------------------------------------------------------------------------------------------------------------------------------------------------------------------------------------------------------------------------------------------------------------------------------------------------------------------------------------------------------|
| Drug monitoring                           | Need for therapeutic drug monitoring or laboratory monitoring, e.g. digoxin, warfarin, antiepileptics                             | <ul style="list-style-type: none"> <li>• The Pharmacology Portal – Norwegian portal for drug and intoxicant analyses - <a href="http://www.farmakologiportalen.no/">http://www.farmakologiportalen.no/</a></li> <li>• Norwegian National Centre for Epilepsy</li> <li>• Centre for Psychopharmacology, Diakonhjemmet Hospital, Norway</li> </ul>                                                                                                                                        |
| Adverse effect                            | Presence of symptoms or changes in laboratory values possibly caused by drug(s)                                                   | <ul style="list-style-type: none"> <li>• Summary of Product Characteristics (SPC)</li> <li>• UpToDate</li> <li>• Micromedex</li> <li>• CredibleMeds, QTDrugs List, - <a href="https://crediblemeds.org/">https://crediblemeds.org/</a></li> </ul>                                                                                                                                                                                                                                       |
| Drug-drug interaction                     | Clinically relevant drug-drug interactions                                                                                        | <ul style="list-style-type: none"> <li>• The Norwegian Medicines Agency – Drug interactions checker</li> <li>• Micromedex – Drug interactions</li> <li>• Drugs.com – Drug interactions checker</li> </ul>                                                                                                                                                                                                                                                                               |
| Non-optimal drug therapy                  | Lack of drug treatment or non-optimal drug treatment of a symptom/disease                                                         | <ul style="list-style-type: none"> <li>• Therapy guidelines</li> <li>• BMJ Best Practice</li> <li>• UpToDate</li> <li>• Summary of Product Characteristics (SPC)</li> </ul>                                                                                                                                                                                                                                                                                                             |
| Reduced organ function / contraindication | Drug or dosage of drug inappropriate due to reduced kidney function, reduced liver function, contraindications or other diseases. | <ul style="list-style-type: none"> <li>• The Renal Drug Handbook - <a href="https://renaldrugdatabase.com/">https://renaldrugdatabase.com/</a></li> <li>• UpToDate</li> <li>• Micromedex</li> <li>• Internetmedicin<br/><a href="https://www.internetmedicin.se/searchresult.aspx?search=lever">https://www.internetmedicin.se/searchresult.aspx?search=lever</a> (reduced liver function/drugs that can harm the liver)</li> <li>• Summary of Product Characteristics (SPC)</li> </ul> |
| Inappropriate drug in elderly             | Use of less favourable drug in patients >65 years old, e.g. anticholinergics                                                      | <ul style="list-style-type: none"> <li>• STOPP 2 (Screening Tool of Older Persons' Prescriptions)</li> <li>• Beers criteria</li> </ul>                                                                                                                                                                                                                                                                                                                                                  |
| Unnecessary drug                          | Drug in use is not indicated                                                                                                      | <ul style="list-style-type: none"> <li>• Therapy guidelines</li> <li>• Summary of Product Characteristics (SPC)</li> <li>• UpToDate</li> </ul>                                                                                                                                                                                                                                                                                                                                          |
| Course length                             | Consideration of appropriate duration of course length, e.g. duration of antibiotics                                              | <ul style="list-style-type: none"> <li>• Summary of Product Characteristics (SPC)</li> <li>• The Norwegian Directorate of Health – National guideline for the use of antibiotics in hospitals</li> <li>• The European Committee on Antimicrobial Susceptibility Testing - EUCAST - minimum inhibitory concentrations</li> </ul>                                                                                                                                                         |
| Practical problem                         | Practical challenges in drug handling, e.g. inhalation devices                                                                    | <ul style="list-style-type: none"> <li>• Summary of Product Characteristics (SPC)</li> <li>• Local procedure for tablets and capsules - dividing, opening and crushing</li> <li>• Handbook of Drug Administration via Enteral Feeding Tubes - <a href="https://about.medicinescomplete.com/publication/drug-administration-via-enteral-feeding-tubes/">https://about.medicinescomplete.com/publication/drug-administration-via-enteral-feeding-tubes/</a></li> </ul>                    |
| Adherence issue                           | Patient does not, intentionally or unintentionally, use / take drug as agreed                                                     | <ul style="list-style-type: none"> <li>• Quick guide inhalators - <a href="https://sykehusapoteket.no/Documents/Inhalasjonsmedisin%20for%200sykehusleger.pdf">https://sykehusapoteket.no/Documents/Inhalasjonsmedisin%20for%200sykehusleger.pdf</a></li> <li>• Videos – use of inhalators - <a href="https://www.felleskatalogen.no/medisin/bruk-av-inhalatorer/aerochamber">https://www.felleskatalogen.no/medisin/bruk-av-inhalatorer/aerochamber</a></li> </ul>                      |
| Other                                     | E.g. prescription errors, documentation errors                                                                                    | <ul style="list-style-type: none"> <li>• The patient's medical record</li> </ul>                                                                                                                                                                                                                                                                                                                                                                                                        |

202

203

1  
2  
3 204 **The control group - standard care**  
4  
5

6 205 The control group received standard care, see Figure 1, which in line with standard  
7  
8 206 procedures in Norwegian hospitals did not include either IMM or any other service from  
9  
10  
11 207 clinical pharmacists.  
12  
13

14 208 **Endpoints**  
15

16 209 The primary endpoint was time to first hospital readmission or death within 12 months after  
17  
18 210 discharge.  
19  
20

21  
22 211 Secondary endpoints:  
23

- 24  
25 212 • Overall survival  
26  
27 213 • Number of unplanned hospitalizations per patient within 12 months after  
28  
29 214 discharge  
30  
31  
32 215 • Proportion of patients:  
33  
34 216 ○ with unplanned hospitalizations within 30 days, 6 months and 12 months  
35  
36 217 after discharge  
37  
38 218 ○ who died within 30 days, 6 months, 12 months and 20 months after  
39  
40 219 discharge  
41  
42 220 ○ who died or had unplanned hospitalizations within 30 days, 6 months and  
43  
44 221 12 months after discharge  
45  
46  
47 222 • Length of stay (LOS) of first hospital readmission  
48  
49 223 • Time to the first unplanned readmission within 12 months after discharge,  
50  
51 224 censored for deaths  
52  
53  
54  
55

56  
57 225 In the original trial protocol, included in S1 Appendix, *difference between the control and*  
58  
59 226 *intervention group in time to the first readmission* was defined as the primary endpoint  
60

1  
2  
3 227 without further specification. As death is a competing risk to readmissions, it was considered  
4  
5 228 appropriate to use *difference in time to readmission or death* as the primary endpoint. This  
6  
7  
8 229 was clarified in the statistical analysis plan, which was finalized and signed before outcome  
9  
10 230 data files were available.

11  
12  
13 231 Data on readmissions were provided by The Norwegian Patient Registry, and data on  
14  
15 232 mortality by The Norwegian Cause of Death Registry. We had originally planned a follow-up  
16  
17 233 of 12 months. However, as both the inclusion period and the retrieval of outcome data took  
18  
19 234 longer than planned, we decided to extend the follow-up of all patients to December 31,  
20  
21 235 2017 to increase statistical power. This amendment was described in the statistical analysis  
22  
23 236 plan, which was finalized and signed before any outcome data files were available. Beacuse  
24  
25 237 the inclusion period lasted approximately 1.5 year, the follow up of each individual patient  
26  
27 238 was in the range 21 – 40 months.

28  
29  
30 239 The primary efficacy analysis excluded patients who died during the index hospital stay as  
31  
32 240 they were never at risk for readmission, as well as erroneously included patients. The  
33  
34 241 analysis population was defined before outcome data files were received.  
35  
36  
37  
38  
39  
40  
41  
42  
43  
44

#### 45 243 **Sample size**

46  
47  
48 244 The sample size calculation was based on an expected 12-month readmission frequency of  
49  
50 245 50%.[23] It was estimated that to detect a 15% absolute reduction in hospital readmissions  
51  
52 246 with 80% power and a significance level of 5%, we would need 168 patients in each group.  
53  
54 247 To compensate for any dropouts, it was decided to enroll 200 patients in each group. Sample  
55  
56 248 size calculations based on proportions are generally considered reliable for survival analysis,  
57  
58 249 but might in some instances over estimate the required sample size.[37] In other words:  
59  
60

1  
2  
3 250 since a survival analysis utilizes the information better than a comparison of proportions at a  
4  
5  
6 251 given time, the power will be somewhat higher than estimated above.  
7

## 8 9 252 **Statistics**

10  
11  
12 253 Time-to-event endpoints were compared between groups by the Kaplan Meier method and  
13  
14 254 the log-rank test. Cox's proportional hazards model was applied to estimate hazard ratios  
15  
16 255 (HRs), which are presented with 95% confidence intervals (CIs). The proportionality  
17  
18 256 assumption was checked by visual inspection of log(-log) plots. Continuous variables were  
19  
20  
21  
22 257 compared between the two groups using Mann-Whitney tests.  
23

24  
25 258 IBM SPSS Software version 25.0 (IBM Corp. NY), was used for all statistical analyses. P values  
26  
27 259 < 0.05 were regarded as statistically significant.  
28

## 29 30 260 **Patient and Public Involvement**

31  
32  
33 261 During the planning of the study, patient representatives from the medical clinic participated  
34  
35  
36 262 in the preparation of the patient information leaflet and commented on the study design.  
37  
38 263 Study results will be presented for the patient representatives and they will be involved in  
39  
40  
41 264 choosing the methods and agreeing on plans for dissemination of study results to patients  
42  
43 265 and relevant communities.  
44

45  
46 266  
47

## 48 49 50 267 **RESULTS**

51  
52  
53 268 During the study period, August 30, 2014, to March 17, 2016, 2174 patients were admitted  
54  
55  
56 269 to the internal medicine ward and 1769 (81%) were assessed for eligibility. Figure 2 shows  
57  
58 270 the patient flow. Among the 598 patients invited to participate, 175 (29%) declined  
59  
60



1  
2  
3 271 (permission to register reasons for declining not obtained). 399 patients were randomized,  
4  
5  
6 272 200 to the intervention group and 199 to the control group. Following randomization, 11  
7  
8 273 patients (5 intervention and 6 control) who died during the hospital stay and 2 patients  
9  
10 274 (both intervention) who were erroneously included, were excluded from the analyses. Thus,  
11  
12  
13 275 the analysis population for all endpoints comprised 193 patients in each group, all followed-  
14  
15 276 up until December 31, 2017, i.e. for a minimum of 21 months and a maximum 40 months.  
16  
17  
18 277 The median age in the analysis population was 79 years (range 23-96), 356 (92%) were  
19  
20  
21 278 home-dwelling before hospitalization and 213 (55%) were women. The median number of  
22  
23 279 regular drugs at hospital admission was 8 (range 4-19). The median number of diseases was  
24  
25  
26 280 7 (range 2-17) and the median CCI score was 3 (range 0-12). The median number of DRPs per  
27  
28 281 patient identified during baseline assessments was 13 (range 3-42). The baseline  
29  
30  
31 282 characteristics of the patients in the control versus the intervention group are presented in  
32  
33 283 Table 2. No differences of importance were observed between the groups.  
34  
35  
36  
37  
38  
39  
40  
41  
42  
43  
44  
45  
46  
47  
48  
49  
50  
51  
52  
53  
54  
55  
56  
57  
58  
59  
60

Table 2. Characteristics of patients in the analysis population.

| Characteristic                                                 | Control<br>(n=193) | Intervention<br>(n=193) |
|----------------------------------------------------------------|--------------------|-------------------------|
| Women                                                          | 106 (55%)          | 102 (53%)               |
| Age                                                            | 80.7 (23.1-96.4)   | 78.0 (25.7-95.6)        |
| Number of unplanned hospitalizations last 6 months             | 1 (0-6)            | 0 (0-11)                |
| Charlson Comorbidity Index score                               | 3 (0-12)           | 2 (0-11)                |
| Most frequent medical history:                                 |                    |                         |
| • Hypertension                                                 | 91 (47%)           | 108 (56%)               |
| • Endocrine and metabolic diseases                             | 77 (40%)           | 80 (42%)                |
| • Kidney disease                                               | 63 (33%)           | 73 (38%)                |
| • Congestive heart failure                                     | 81 (42%)           | 68 (35%)                |
| • Arythmia                                                     | 72 (37%)           | 71 (37%)                |
| Body-mass index <sup>a</sup>                                   | 24.4 (14.4-48.4)   | 25.0 (13.1-43.3)        |
| Laboratory results:                                            |                    |                         |
| • Glomerular filtration rate (ml/min)                          | 49 (8-235)         | 52 (9-229)              |
| • Serum-albumin (g/L) <sup>b</sup>                             | 38 (24-51)         | 38 (22-56)              |
| • C-reactive protein (nmol/L)                                  | 133 (0-3419)       | 152 (0-5248)            |
| Number of prescribed drugs <sup>c</sup> at hospital admission: |                    |                         |
| • Regular                                                      | 8 (4-19)           | 8 (4-19)                |
| • On demand                                                    | 2 (0-10)           | 2 (0-11)                |
| Assistance with drug administration before hospitalization:    |                    |                         |
| • Multidose                                                    | 51 (26%)           | 46 (24%)                |
| • Home nurse                                                   | 33 (17%)           | 28 (15%)                |
| • Nursing home                                                 | 15 (8%)            | 15 (8%)                 |
| • Relative                                                     | 13 (7%)            | 14 (7%)                 |
| Home-dwelling before hospitalization                           | 178 (92%)          | 178 (92%)               |
| Number of drug-related problems                                | 13 (3-31)          | 13 (3-42)               |
| Length of index hospital stay, number of days                  | 8 (2-57)           | 7 (1-66)                |
| Total number of prescribed drugs at hospital discharge         | 11 (3-24)          | 11 (3-23)               |
| Discharged to home                                             | 124 (64%)          | 129 (67%)               |
| Assistance with drug administration after discharge:           |                    |                         |
| • Multidose                                                    | 28 (15%)           | 26 (14%)                |
| • Home nurse                                                   | 32 (17%)           | 21 (11%)                |
| • Nursing home                                                 | 51 (26%)           | 51 (26%)                |
| • Relative                                                     | 7 (4%)             | 11 (6%)                 |
| • Other institution/hospital ward                              | 18 (9%)            | 13 (7%)                 |

Data are n (%) or median (range).

<sup>a</sup> Body-mass index was registered for 144/193 control patients and 148/193 intervention patients.

<sup>b</sup> Serum-albumin was registered for 181/193 control patients and 187/193 intervention patients.

<sup>c</sup> After medicines reconciliation

1  
2  
3 285 In the group receiving pharmacist-led medicines management, a total of 3826 DRPs were  
4  
5 286 revealed at hospital admission and during the hospital stay. Type of DRPs revealed and  
6  
7  
8 287 presented for discussion in the multidisciplinary team and the respective acceptance rates  
9  
10 288 will be presented in a separate publication. In overall numbers, 1100 of the 3826 identified  
11  
12  
13 289 DRPs (29 %) were solved without the need for discussion in the multidisciplinary treatment  
14  
15 290 team, while 1075 (28%) were not prioritized for discussion, i.e. considered of low  
16  
17  
18 291 importance compared to other DRPs or the patients' clinical state. The remaining 1651 (43  
19  
20 292 %) DRPs were discussed in the multidisciplinary team, whereof 1022 (62 %) led to immediate  
21  
22  
23 293 changes of the individual patient's drug treatment. In 6 of the 193 control patients (1.5 %)  
24  
25 294 severe medicines discrepancies or DRPs that had to be intervened on were revealed during  
26  
27  
28 295 baseline assessments.

29  
30 296 Figure 3a shows time to first readmission or death in the two groups. The median time to  
31  
32  
33 297 readmission or death was 184 days in the intervention group and 116 days in the control  
34  
35  
36 298 group, but the difference was not statistically significant (HR 0.82, 95% CI 0.64 to 1.04,  
37  
38 299  $p=0.106$ ). Sensitivity analyses, extending follow-up until December 31, 2017 or excluding  
39  
40  
41 300 control patients who were intervened on, did not influence the effect estimate (HR 0.84,  
42  
43 301 95% CI 0.68 to 1.05,  $p=0.118$  and HR 0.85, 95% CI 0.68 to 1.06,  $p=0.149$ , respectively). The  
44  
45  
46 302 secondary endpoint analysis of time to first readmission, censoring for 20 deaths, gave a  
47  
48 303 similar effect estimate (HR 0.81, 95% CI 0.63-1.04,  $p=0.104$ ), shown in S2 Figure. There was a  
49  
50 304 statistically significant difference in overall survival (HR 0.66, 95% CI 0.48 to 0.90,  $p=0.008$ ),  
51  
52  
53 305 as shown in Figure 3b.

306 The results of other the secondary endpoint analyses are shown in Table 3. Within 20  
 307 months after the index discharge, 27% of the intervention patients had died versus 39% of  
 308 the control patients.

309 Table 3. Secondary endpoint analyses.

| Endpoint                                                                                          | Intervention group<br>(n=193) | Control group<br>(n = 193) |
|---------------------------------------------------------------------------------------------------|-------------------------------|----------------------------|
| Number of unplanned hospitalizations per patient within 12 months after discharge, median (range) | 1 (0-13)                      | 1 (0-12)                   |
| Length of hospital stay of first unplanned hospitalization, median number of days (range)         | 6 (1-58)                      | 6 (1-71)                   |
| Number of patients unplanned hospitalized within                                                  |                               |                            |
| • 30 days after index discharge, n (%)                                                            | 37 (19)                       | 46 (24)                    |
| • 6 months after index discharge, n (%)                                                           | 89 (46)                       | 103 (53)                   |
| • 12 months after index discharge, n (%)                                                          | 115 (60)                      | 129 (67)                   |
| Number of patients who died within                                                                |                               |                            |
| • 30 days after index discharge, n (%)                                                            | 4 (2)                         | 7 (4)                      |
| • 6 months after index discharge, n (%)                                                           | 24 (12)                       | 36 (19)                    |
| • 12 months after index discharge, n (%)                                                          | 44 (23)                       | 56 (29)                    |
| • 20 months after index discharge, n (%)                                                          | 52 (27)                       | 76 (39)                    |
| Number of patients who died or was unplanned hospitalized within                                  |                               |                            |
| • 30 days after index discharge, n (%)                                                            | 41 (21)                       | 51 (26)                    |
| • 6 months after index discharge, n (%)                                                           | 96 (50)                       | 113 (59)                   |
| • 12 months after index discharge, n (%)                                                          | 125 (65)                      | 139 (72)                   |

310

## 311 DISCUSSION

312 Pharmacist-led medicines management in multimorbid patients did not statistically  
 313 significantly prolong the time until first readmission or death compared to control patients.  
 314 The result are in contrast with previous randomized controlled trials (RCTs) on similar  
 315 interventions provided to other patient populations, showing a decreased readmission rate,  
 316 prolonged time to readmission, and a reduction in hospital visits.[23, 38-40] This contrast  
 317 may be explained by the patient population. To our knowledge, our study is the first to  
 318 investigate the effect of a medicines management intervention on clinically relevant  
 319 endpoints in multimorbid patients with complex drug regimens. In this population, urgent

1  
2  
3 320 medical care like hospital readmissions, might be difficult to avoid. This theory is supported  
4  
5  
6 321 by a subgroup analysis of one of the previous RCTs, which found that in patients 80 years or  
7  
8 322 older a pharmacist intervention was more effective in preventing emergency department  
9  
10 323 visits in patients using less than 5 drugs compared to patients using 5 drugs or more.[28]  
11  
12  
13 324 However, it should be noted that the 95% confidence interval in our study is wide and  
14  
15 325 compatible with a risk reduction of 36% as well as a 4% increased risk. The sample size  
16  
17 326 calculation in the current study was based on a target 15% reduction in readmissions, which  
18  
19 327 may have been optimistic, and insufficient power may therefore explain the non-significant  
20  
21 328 result.  
22  
23  
24  
25

26 329 A statistically significantly increased overall survival, one of the secondary endpoints, was  
27  
28 330 seen in patients in the intervention versus control group. The hazard reduction of 34% is  
29  
30 331 indisputably clinically relevant and reflects a great improvement potential in the care of  
31  
32 332 multimorbid patients. To our knowledge, this is the first study to show an effect of  
33  
34 333 pharmacist-led medicines management on survival. This endpoint was either not  
35  
36 334 investigated[23, 40], or no effect was seen[38, 39] in the previous RCTs. The results of our  
37  
38 335 study are in contrast to the recent Cochrane review concluding that “medication review  
39  
40 336 does not seem to prevent death and hospital readmissions”. [22] The reason for this  
41  
42 337 discrepancy is most likely multifactorial and due to differences in patient populations,  
43  
44 338 characteristics of the interventions, and the duration of the follow-up. Important differences  
45  
46 339 in the patient populations include older patients in the study by Gillespie et al.[38], and that  
47  
48 340 the study by Ravn-Nielsen et al.[41] included patients with lower mortality than the current  
49  
50 341 study, i.e. mortality rates of 10% versus 19%, respectively, in the control group at 6 months  
51  
52 342 after index discharge. In our study, a thorough intervention conducted close to the patient,  
53  
54 343 including medicines reconciliation both at admission and discharge as well as improved  
55  
56  
57  
58  
59  
60

1  
2  
3 344 information at discharge to ensure continuous treatment and increase adherence, may  
4  
5 345 constitute characteristics of the intervention important for the effect on survival. Clinical  
6  
7  
8 346 pharmacists performing the procedures of the intervention in close collaboration with the  
9  
10 347 patient, physician and other members of the treatment team are most likely also important  
11  
12  
13 348 for obtaining the effect on survival. At last, the longer follow-up in the present study,  
14  
15 349 prolonged by several months compared to the other RCTs[38, 41], could have allowed  
16  
17 350 prophylactic drugs added during medicine reviews enough time to achieve beneficial  
18  
19 351 effects[22] and probably contributes to explain the intervention`s effect on survival.  
20  
21  
22  
23 352 Heterogeneity in the pharmacist-led in-hospital interventions, including various elements of  
24  
25 353 various intensity, make comparisons of results amongst studies, as well as interpretation of  
26  
27 354 results, challenging.[22, 42] Furthermore, such interventions are indisputably complex, and  
28  
29 355 evaluating such interventions is complicated.[43, 44] The intervention consists of various  
30  
31 356 components delivered as an overall intervention. With such a design, it is not known  
32  
33 357 whether the overall intervention or only parts of it are important for effect. The intervention  
34  
35 358 in the current study consisted of elements of the highest level of intensity, i.e. diamond level  
36  
37 359 medicines reconciliation[42, 45] and advanced medicines reviews.[46] In the recent RCT  
38  
39 360 from Denmark, a similar intervention of similar intensity reduced emergency department  
40  
41 361 visits and hospital readmissions, but did not have effect on mortality[41], i.e. the opposite of  
42  
43 362 our results. Differences in eligibility criteria, nuances in the delivered intervention and/or  
44  
45 363 care delivered to control patients, clinical pharmacists` training and how they interacted  
46  
47 364 with the rest of the multidisciplinary treatment team may be factors contributing to explain  
48  
49 365 this. The current study nevertheless adds to the international body of literature that high-  
50  
51 366 intensity, in-hospital pharmacist-led interventions to tailor drug therapy may improve clinical  
52  
53 367 outcomes in high-risk patients.  
54  
55  
56  
57  
58  
59  
60

1  
2  
3 368 The intervention had no effect on the length of stay (LOS) of the first readmission. This was  
4  
5  
6 369 not surprising, as hospitals in Norway for several years have received incentives to reduce  
7  
8 370 LOS, illustrated by as short as 6 days median LOS of the first readmission in the present  
9  
10 371 study. In comparison, an IMM-intervention showed a reduction from 13.1 days to 9.7 days  
11  
12 372 LOS of the first readmission in Northern Ireland.[23] The number of unplanned  
13  
14  
15 373 hospitalizations during 12 months follow-up did not differ between the groups in the present  
16  
17  
18 374 study, in line with findings by Gillespie et al.[38]  
19  
20  
21 375 Drug counts were chosen as the preferred multimorbidity measure at patient inclusion,  
22  
23 376 which could be seen as a limitation. Nonetheless, this strategy resulted in the inclusion of a  
24  
25  
26 377 multimorbid patient population, as validated by diseases counts according to the generally  
27  
28 378 accepted definition.[3] Our study included patients from a single hospital in Norway which  
29  
30  
31 379 may challenge the generalizability. However, the study had few exclusion criteria, thus  
32  
33 380 comprising a broad population. The low drop-out rate further contributes favourably to  
34  
35  
36 381 external validity.

37  
38  
39 382 It was not feasible to blind participants, study pharmacists or ward physicians to group  
40  
41 383 allocation. To limit bias, the study was blinded on all steps considered possible to blind. Any  
42  
43  
44 384 spill-over effect of the intervention to control patients would, in any case, reduce the effect  
45  
46 385 estimate. Due to the complexity of the intervention a proportion of the intervention patients  
47  
48 386 did not receive the complete intervention, which may also have contributed to the non-  
49  
50  
51 387 significance on the primary endpoint and an underestimation of the effect on survival. The  
52  
53 388 broad inclusion criteria may have resulted in the inclusion of participants at low risk of  
54  
55  
56 389 readmission and death, which might also have contributed to the non-significant result on  
57  
58 390 the primary endpoint, as well as buffered the effect of the intervention on survival. Studying  
59  
60

1  
2  
3 391 the effect of pharmacist-led medicines management in a subgroup of multimorbid patients  
4  
5 392 at the highest risk of readmission, e.g. by stratifying on frailty, could be useful. The  
6  
7  
8 393 randomized controlled design, almost 200 patients in each group, and the long follow-up of  
9  
10 394 all patients are factors that strengthen the study.

## 13 395 **CONCLUSION**

16  
17 396 Pharmacist-led medicines management in-hospital to multimorbid patients had no  
18  
19 397 statistically significant effect on time until readmission or death. A statistically significant  
20  
21  
22 398 increase in overall survival was seen. As a response to the increasing challenges of providing  
23  
24 399 safe and evidence-based healthcare to high-risk multimorbid patients, further studies should  
25  
26  
27 400 be conducted to investigate the effect of such an intervention on a larger scale.

28  
29  
30 401

31  
32  
33 402

## 35 403 **Competing interests statement**

36  
37  
38  
39 404 Author ML received PhD funding from the South-Eastern Norway Regional Health Authority  
40  
41  
42 405 (grant number 12/00718). The other authors declare that they have no competing interests.

## 43 44 406 **Acknowledgments**

45  
46  
47  
48 407 The authors thank the study pharmacists Anne Schwinghammer, Anette Engnes, Elin  
49  
50 408 Trapnes, Hanne Steen and Petra Foyndland for their valuable contribution in patient inclusion,  
51  
52  
53 409 medicines reconciliation and review, senior physician Jo Fuglestved for summarizing the CCI  
54  
55 410 scores, Anne Mette Njaastad, Kristin Hestad Solheim, Kristin Thomassen and Torhild  
56  
57  
58 411 Heggstad for valuable input on the study design, employees at the internal medicine ward  
59  
60



1  
2  
3 412 for positive attitude to the study, and finally Dominic Anthony Hoff for valuable support  
4  
5 413 regarding data punching.  
6  
7

#### 8 414 **Data sharing statement**

9  
10  
11 415 The data that support the findings of this study are available from Oslo University Hospital  
12  
13 416 but restrictions apply to the availability of these data, which were used under license for the  
14  
15 417 current study, and so are not publicly available. Deidentified participant data are however  
16  
17 418 available from the authors upon reasonable request and with permission of Oslo University  
18  
19 419 Hospital, with publication. Additional related documents, e.g. patient consent forms, are  
20  
21 420 available at request.  
22  
23  
24  
25

#### 26 421 **Funding**

27  
28  
29 422 This work was supported by South-Eastern Norway Regional Health Authority (PhD grant  
30  
31 423 number 12/00718 to author ML). Additional support was provided by the Hospital  
32  
33 424 Pharmacies Enterprise and Oslo University Hospital and Diakonhjemmet hospital. The  
34  
35 425 funders had no role in study design, data collection and analysis, decision to publish, or  
36  
37 426 preparation of the manuscript.  
38  
39  
40  
41  
42

#### 43 427 **Author contributions**

44  
45  
46 428 **Marianne Lea:** Conceptualization, Formal analysis, Funding acquisition, Investigation,  
47  
48 429 Methodology, Project administration, Software, Writing – original draft, Writing – review &  
49  
50 430 editing  
51  
52  
53

54 431 **Morten Mowe:** Conceptualization, Funding acquisition, Methodology, Project  
55  
56 432 administration, Supervision, Writing – review & editing  
57  
58  
59  
60

- 1  
2  
3 433 **Espen Molden:** Conceptualization, Funding acquisition, Methodology, Supervision, Writing –  
4  
5  
6 434 review & editing  
7  
8  
9 435 **Kristin Kvernørød:** Investigation, Methodology, Resources, Writing – review & editing  
10  
11  
12 436 **Eva Skovlund:** Conceptualization, Formal analysis, Funding acquisition, Methodology,  
13  
14 437 Writing – review & editing  
15  
16  
17 438 **Liv Mathiesen:** Conceptualization, Formal analysis, Funding acquisition, Methodology,  
18  
19 439 Project administration, Supervision, Writing – original draft, Writing – review & editing  
20  
21  
22 440 **Disclaimer:** Data from the the Norwegian Patient Registry has been used in this publication.  
23  
24 441 The interpretation and reporting of these data are the sole responsibility of the authors, and  
25  
26 442 no endorsement by the Norwegian Patient Registry is intended nor should be inferred.  
27  
28  
29  
30  
31  
32  
33  
34  
35  
36  
37  
38  
39  
40  
41  
42  
43  
44  
45  
46  
47  
48  
49  
50  
51  
52  
53  
54  
55  
56  
57  
58  
59  
60

## REFERENCES

1. Uijen AA, van de Lisdonk EH. Multimorbidity in primary care: prevalence and trend over the last 20 years. *The European journal of general practice*. 2008;14 Suppl 1:28-32.
2. Jureviciene E, Onder G, Visockiene Z, Puronaite R, Petrikonyte D, Gargalskaite U, et al. Does multimorbidity still remain a matter of the elderly: Lithuanian national data analysis. *Health policy (Amsterdam, Netherlands)*. 2018;122(6):681-6.
3. Mercer S, Salisbury C, Fortin M. ABC of Multimorbidity. First ed: John Wiley & Sons; 2014.
4. Marengoni A, Angleman S, Melis R, Mangialasche F, Karp A, Garmen A, et al. Aging with multimorbidity: a systematic review of the literature. *Ageing research reviews*. 2011;10(4):430-9.
5. Roberts KC, Rao DP, Bennett TL, Loukine L, Jayaraman GC. Prevalence and patterns of chronic disease multimorbidity and associated determinants in Canada. *Health promotion and chronic disease prevention in Canada : research, policy and practice*. 2015;35(6):87-94.
6. Brett T, Arnold-Reed DE, Popescu A, Soliman B, Bulsara MK, Fine H, et al. Multimorbidity in patients attending 2 Australian primary care practices. *Annals of family medicine*. 2013;11(6):535-42.
7. Nobili A, Marengoni A, Tettamanti M, Salerno F, Pasina L, Franchi C, et al. Association between clusters of diseases and polypharmacy in hospitalized elderly patients: results from the REPOSI study. *European journal of internal medicine*. 2011;22(6):597-602.
8. DuGoff EH, Canudas-Romo V, Buttorff C, Leff B, Anderson GF. Multiple chronic conditions and life expectancy: a life table analysis. *Medical care*. 2014;52(8):688-94.
9. Lehnert T, Heider D, Leicht H, Heinrich S, Corrieri S, Lupp M, et al. Review: health care utilization and costs of elderly persons with multiple chronic conditions. *Medical care research and review : MCRR*. 2011;68(4):387-420.
10. Boyd CM, Darer J, Boult C, Fried LP, Boult L, Wu AW. Clinical practice guidelines and quality of care for older patients with multiple comorbid diseases: implications for pay for performance. *Jama*. 2005;294(6):716-24.
11. Tinetti ME, Fried TR, Boyd CM. Designing health care for the most common chronic condition--multimorbidity. *Jama*. 2012;307(23):2493-4.
12. Barnett K, Mercer SW, Norbury M, Watt G, Wyke S, Guthrie B. Epidemiology of multimorbidity and implications for health care, research, and medical education: a cross-sectional study. *Lancet (London, England)*. 2012;380(9836):37-43.
13. Koberlein-Neu J, Mennemann H, Hamacher S, Waltering I, Jaehde U, Schaffert C, et al. Interprofessional Medication Management in Patients With Multiple Morbidities. *Deutsches Arzteblatt international*. 2016;113(44):741-8.
14. Fiss T, Meinke-Franze C, van den Berg N, Hoffmann W. Effects of a three party healthcare network on the incidence levels of drug related problems. *International journal of clinical pharmacy*. 2013;35(5):763-71.
15. Al Hamid A, Ghaleb M, Aljadhey H, Aslanpour Z. A systematic review of hospitalization resulting from medicine-related problems in adult patients. *British journal of clinical pharmacology*. 2014;78(2):202-17.
16. Gustafsson M, Sjolander M, Pfister B, Jonsson J, Schneede J, Lovheim H. Drug-related hospital admissions among old people with dementia. *European journal of clinical pharmacology*. 2016;72(9):1143-53.
17. Rafter N, Hickey A, Conroy RM, Condell S, O'Connor P, Vaughan D, et al. The Irish National Adverse Events Study (INAES): the frequency and nature of adverse events in Irish hospitals-a retrospective record review study. *BMJ quality & safety*. 2017;26(2):111-9.
18. Lea M, Rognan SE, Koristovic R, Wyller TB, Molden E. Severity and management of drug-drug interactions in acute geriatric patients. *Drugs & aging*. 2013;30(9):721-7.
19. Hohmann C, Neumann-Haefelin T, Klotz JM, Freidank A, Radziwill R. Drug-related problems in patients with ischemic stroke in hospital. *International journal of clinical pharmacy*. 2012;34(6):828-31.

- 1  
2  
3 492 20. El Morabet N, Uitvlugt EB, van den Bemt BJB, van den Bemt P, Janssen MJA, Karapinar-Carkit  
4 493 F. Prevalence and Preventability of Drug-Related Hospital Readmissions: A Systematic Review.  
5 494 *Journal of the American Geriatrics Society*. 2018;66(3):602-8.
- 6 495 21. Schwab C, Korb-Savoldelli V, Escudie JB, Fernandez C, Durieux P, Saint-Jean O, et al.  
7 496 Iatrogenic risk factors associated with hospital readmission of elderly patients: A matched case-  
8 497 control study using a clinical data warehouse. *Journal of clinical pharmacy and therapeutics*.  
9 498 2018;43(3):393-400.
- 11 499 22. Christensen M, Lundh A. Medication review in hospitalised patients to reduce morbidity and  
12 500 mortality. *The Cochrane database of systematic reviews*. 2016;2:Cd008986.
- 13 501 23. Scullin C, Scott MG, Hogg A, McElnay JC. An innovative approach to integrated medicines  
14 502 management. *Journal of evaluation in clinical practice*. 2007;13(5):781-8.
- 15 503 24. Midlov P, Holmdahl L, Eriksson T, Bergkvist A, Ljungberg B, Widner H, et al. Medication report  
16 504 reduces number of medication errors when elderly patients are discharged from hospital. *Pharmacy  
17 505 world & science : PWS*. 2008;30(1):92-8.
- 19 506 25. Scullin C, Hogg A, Luo R, Scott MG, McElnay JC. Integrated medicines management - can  
20 507 routine implementation improve quality? *Journal of evaluation in clinical practice*. 2012;18(4):807-  
21 508 15.
- 22 509 26. Midlov P, Deierborg E, Holmdahl L, Hoglund P, Eriksson T. Clinical outcomes from the use of  
23 510 Medication Report when elderly patients are discharged from hospital. *Pharmacy world & science :  
24 511 PWS*. 2008;30(6):840-5.
- 25 512 27. Bergkvist A, Midlov P, Hoglund P, Larsson L, Bondesson A, Eriksson T. Improved quality in the  
26 513 hospital discharge summary reduces medication errors--LIMM: Landskrona Integrated Medicines  
27 514 Management. *European journal of clinical pharmacology*. 2009;65(10):1037-46.
- 29 515 28. Alassaad A, Bertilsson M, Gillespie U, Sundstrom J, Hammarlund-Udenaes M, Melhus H. The  
30 516 effects of pharmacist intervention on emergency department visits in patients 80 years and older:  
31 517 subgroup analyses by number of prescribed drugs and appropriate prescribing. *PloS one*.  
32 518 2014;9(11):e111797.
- 33 519 29. Perera R, Heneghan C, Yudkin P. Graphical method for depicting randomised trials of complex  
34 520 interventions. *BMJ (Clinical research ed)*. 2007;334(7585):127-9.
- 35 521 30. World Health Organization. Collaborating Centre for Drug Statistics Methodology. ATC index  
36 522 with DDDs [cited 2018 September 20]. Available from: [https://www.whocc.no/atc\\_ddd\\_index/](https://www.whocc.no/atc_ddd_index/).
- 37 523 31. Wallace E, McDowell R, Bennett K, Fahey T, Smith SM. Comparison of count-based  
38 524 multimorbidity measures in predicting emergency admission and functional decline in older  
39 525 community-dwelling adults: a prospective cohort study. *BMJ open*. 2016;6(9):e013089.
- 41 526 32. Nilsson N, Lea M, Lao Y, Wendelbo K, Gløersen G, Mowé M, et al. Medication discrepancies  
42 527 revealed by medication reconciliation and their potential short-term and long-term effects: a  
43 528 Norwegian multicentre study carried out on internal medicine wards. *European Journal of Hospital  
44 529 Pharmacy*. 2015;22:298-303.
- 45 530 33. Pharmaceutical Care Network Europe (PCNE). Classification for Drug related problems V 6.2.  
46 531 [cited 2018 April 3]. Available from: [http://www.pcne.org/upload/files/11\\_PCNE\\_classification\\_V6-  
47 532 2.pdf](http://www.pcne.org/upload/files/11_PCNE_classification_V6-2.pdf).
- 49 533 34. Cockcroft DW, Gault MH. Prediction of creatinine clearance from serum creatinine. *Nephron*.  
50 534 1976;16(1):31-41.
- 51 535 35. Salazar DE, Corcoran GB. Predicting creatinine clearance and renal drug clearance in obese  
52 536 patients from estimated fat-free body mass. *The American journal of medicine*. 1988;84(6):1053-60.
- 53 537 36. Charlson ME, Pompei P, Ales KL, MacKenzie CR. A new method of classifying prognostic  
54 538 comorbidity in longitudinal studies: development and validation. *Journal of chronic diseases*.  
55 539 1987;40(5):373-83.
- 57 540 37. Gail MH. Applicability of sample size calculations based on a comparison of proportions for  
58 541 use with the logrank test. *Controlled Clinical Trials*. 1985;6(2):112-9.

- 1  
2  
3 542 38. Gillespie U, Alassaad A, Henrohn D, Garmo H, Hammarlund-Udenaes M, Toss H, et al. A  
4 543 comprehensive pharmacist intervention to reduce morbidity in patients 80 years or older: a  
5 544 randomized controlled trial. *Archives of internal medicine*. 2009;169(9):894-900.  
6 545 39. Ravn-Nielsen LV, Duckert ML, Lund ML, Henriksen JP, Nielsen ML, Eriksen CS, et al. Effect of  
7 546 an In-Hospital Multifaceted Clinical Pharmacist Intervention on the Risk of Readmission: A  
8 547 Randomized Clinical Trial. *JAMA internal medicine*. 2018;178(3):375-82.  
9 548 40. Makowsky MJ, Koshman SL, Midodzi WK, Tsuyuki RT. Capturing outcomes of clinical activities  
10 549 performed by a rounding pharmacist practicing in a team environment: the COLLABORATE study  
11 550 [NCT00351676]. *Medical care*. 2009;47(6):642-50.  
12 551 41. Ravn-Nielsen LV, Duckert M-L, Lund ML, Henriksen JP, Nielsen ML, Eriksen CS, et al. Effect of  
13 552 an In-Hospital Multifaceted Clinical Pharmacist Intervention on the Risk of Readmission: A  
14 553 Randomized Clinical Trial. *JAMA internal medicine*. 2018;178(3):375-82.  
15 554 42. Baker M, Bell CM, Xiong W, Etchells E, Rossos PG, Shojania KG, et al. Do Combined  
16 555 Pharmacist and Prescriber Efforts on Medication Reconciliation Reduce Postdischarge Patient  
17 556 Emergency Department Visits and Hospital Readmissions? *J Hosp Med*. 2018;13(3):152-7.  
18 557 43. Craig P, Dieppe P, Macintyre S, Michie S, Nazareth I, Petticrew M. Developing and evaluating  
19 558 complex interventions: the new Medical Research Council guidance. *BMJ (Clinical research ed)*.  
20 559 2008;337:a1655.  
21 560 44. Richards D, Hallberg IR. Complex interventions in health. An overview of research methods.:  
22 561 Routledge; 2015.  
23 562 45. Fernandes O. Medication reconciliation in the hospital: what, why, where, when, who and  
24 563 how? *Healthc Q*. 2012;15 Spec No:42-9.  
25 564 46. Griese-Mammen N, Hersberger KE, Messerli M, Leikola S, Horvat N, van Mil JWF, et al. PCNE  
26 565 definition of medication review: reaching agreement. *International journal of clinical pharmacy*.  
27 566 2018;40(5):1199-208.

31  
32  
33  
34  
35 567

36 568

37 569

38  
39  
40 570 **FIGURE LEGENDS**41  
42 **Figure 1.** Title: Graphical depiction of the study design, inspired by Perera and colleagues [29].43  
44 Objects are represented by squares and activities by circles.45  
46  
47 **Figure 2.** Title: Patient flow.48  
49  
50 **Figure 3**51  
52 **a)** Title: Time to first hospital readmission or death in the intervention versus control group.53  
54 **b)** Title: Overall survival in the intervention versus control group.  
55  
56  
57  
58  
59  
60

1  
2  
3  
4  
5 **SUPPLEMENTARY MATERIAL**  
6

7 **S1 Appendix.** Original trial protocol, protocol amendments, statistical analysis plan, statistical  
8 analysis plan amendment and timeline of the study with milestones.  
9

10 **S2 Figure.** Time to first hospital readmission in the intervention versus control group, censored for  
11 deaths.  
12

13 **S3 Appendix.** CONSORT Checklist.  
14  
15  
16  
17  
18  
19  
20  
21  
22  
23  
24  
25  
26  
27  
28  
29  
30  
31  
32  
33  
34  
35  
36  
37  
38  
39  
40  
41  
42  
43  
44  
45  
46  
47  
48  
49  
50  
51  
52  
53  
54  
55  
56  
57  
58  
59  
60

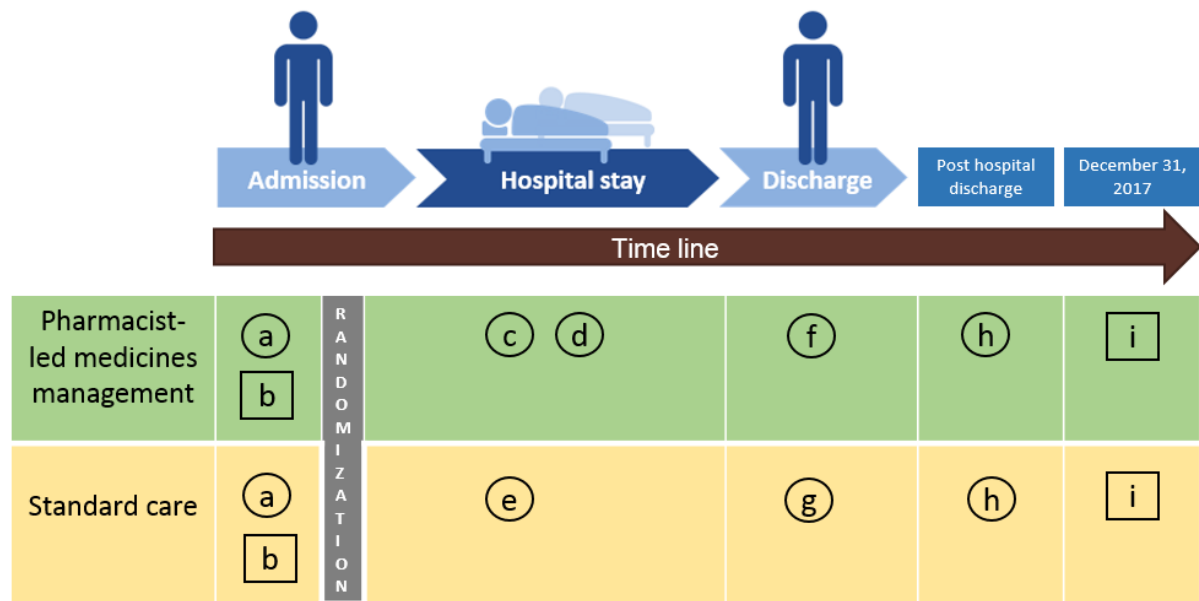

|     |                                                                                                                                                                                                                                                                                                                                                                                                                                                                                                                                                                                                                                                                                                                                                                                                                                                                                                                                                                                              |
|-----|----------------------------------------------------------------------------------------------------------------------------------------------------------------------------------------------------------------------------------------------------------------------------------------------------------------------------------------------------------------------------------------------------------------------------------------------------------------------------------------------------------------------------------------------------------------------------------------------------------------------------------------------------------------------------------------------------------------------------------------------------------------------------------------------------------------------------------------------------------------------------------------------------------------------------------------------------------------------------------------------|
| (a) | Medicines reconciliation and review conducted by clinical pharmacist <i>without</i> discussion of medicine discrepancies or drug-related problems (DRPs) and possible solutions in the multidisciplinary team <sup>a</sup>                                                                                                                                                                                                                                                                                                                                                                                                                                                                                                                                                                                                                                                                                                                                                                   |
| [b] | Patient characteristics collected                                                                                                                                                                                                                                                                                                                                                                                                                                                                                                                                                                                                                                                                                                                                                                                                                                                                                                                                                            |
| (c) | Multidisciplinary treatment team <sup>a</sup> discussions of medicine discrepancies and DRPs revealed at hospital admission and possible solutions                                                                                                                                                                                                                                                                                                                                                                                                                                                                                                                                                                                                                                                                                                                                                                                                                                           |
| (d) | Medicines review conducted by clinical pharmacists by systematically addressing 11 pre-defined risk categories for each drug each patient was prescribed at a given point of time; drug monitoring, adverse effect, drug-drug interaction, non-optimal drug therapy, reduced organ function/contraindication, inappropriate drug in elderly, unnecessary drug, course length, practical problem, adherence issue and other. Medicines reviews were performed at admission and repeatedly as needed due to changes in either prescription, patient symptoms, clinical state, and/or laboratory values. Patients were reviewed for such changes daily, Monday to Friday, during regular daytime working hours. Consecutively multidisciplinary treatment team <sup>a</sup> discussions of identified DRPs and possible solutions.                                                                                                                                                              |
| (e) | Standard in-hospital care provided by physicians with internal medicine expertise, nursing staff and when needed; clinical nutrition physiologists and/or physiotherapists                                                                                                                                                                                                                                                                                                                                                                                                                                                                                                                                                                                                                                                                                                                                                                                                                   |
| (f) | Medicines reconciliation, followed by written and verbal information tailored to the patient's further needs of care, as well as discharge activities aiming to ensure continuous treatment and increase adherence: <ul style="list-style-type: none"> <li>• Written systematic information comprising a reconciled drug list with description and justification for all changes made during the hospital stay, to the next care provider<sup>b</sup> (all patients), and to the patient/relative if they to some extent would be involved in handling the drugs after discharge</li> <li>• Verbal information/conversation with the patient and/or relative adapted to the patient needs<sup>c</sup> - if they to some extent would be involved in handling the drugs after discharge</li> <li>• Assistance with retrieving drugs from the pharmacy, if needed</li> <li>• Providing the patient with drugs from the hospital pending on an updated multidose delivery, if needed</li> </ul> |
| (g) | Discharge medicine information (not standardized) provided by physicians with internal medicine expertise and nursing staff                                                                                                                                                                                                                                                                                                                                                                                                                                                                                                                                                                                                                                                                                                                                                                                                                                                                  |
| (h) | Standard care in the primary health care (details not collected)                                                                                                                                                                                                                                                                                                                                                                                                                                                                                                                                                                                                                                                                                                                                                                                                                                                                                                                             |
| [i] | Last day of follow-up on readmissions and mortality outcomes                                                                                                                                                                                                                                                                                                                                                                                                                                                                                                                                                                                                                                                                                                                                                                                                                                                                                                                                 |

<sup>a</sup> The multidisciplinary treatment team consisted of physician with expertise in internal medicine, nursing staff, clinical pharmacist, and when needed; clinical nutrition physiologists and/or physiotherapists

<sup>b</sup> The general practitioner, nursing home, home nurse and/or multidose delivering pharmacy.

<sup>c</sup> Sometimes regarding the entire drug list, sometimes the most important changes, sometimes regarding one specific drug. If the patient was considered to benefit from any provided information or given the opportunity to ask questions, such a targeted conversation was conducted, even if a complex conversation was not considered favorable.

**Enrollment**

1769 Patients assessed for eligibility

24 Patients lost before randomization  
 8 Withdrawal of consent  
 5 Transferred to other hospital ward  
 5 Discharged  
 3 Died  
 3 Medicines reconciliation revealed use of less than 4 regular drugs

1346 Excluded patients  
 913 Not meeting inclusion criteria  
 258 Not asked to participate due to study pharmacist capacity  
 175 Declined to participate

399 Randomized

**Allocation**

199 Allocated to control group  
 193 Received allocated care  
 6 Did not receive allocated care - intervention due to severe medicines discrepancy or drug-related problem

200 Allocated to intervention group  
 123 Received allocated intervention  
 77 Did not receive complete allocated intervention

6 Died during index hospital stay

5 Died during index hospital stay

2 Erroneous inclusions  
 1 Re-inclusion  
 1 Lacking Norwegian personal Identification number

**Follow-Up**

193 Included in analysis

**Analysis**

193 Included in analysis

6 No intervention  
 4 Transferred to other ward  
 2 Discharged

3 Intervention only at hospital admission  
 1 Then transferred to other ward  
 2 Then discharged

184 Intervention at hospital admission & during hospital stay

Intervention at hospital discharge

| Oral information to patient | Written information to patient | Written information to next care level | Number of patients, n |
|-----------------------------|--------------------------------|----------------------------------------|-----------------------|
| Not applicable              | Not applicable                 | No                                     | 8                     |
| No                          | No                             | No                                     | 14                    |
| Yes                         | No                             | No                                     | 11                    |
| No                          | Yes                            | No                                     | 3                     |
| Yes                         | Yes                            | No                                     | 21                    |
| No                          | Yes                            | Yes                                    | 4                     |
| Yes                         | Yes                            | Yes                                    | 123                   |



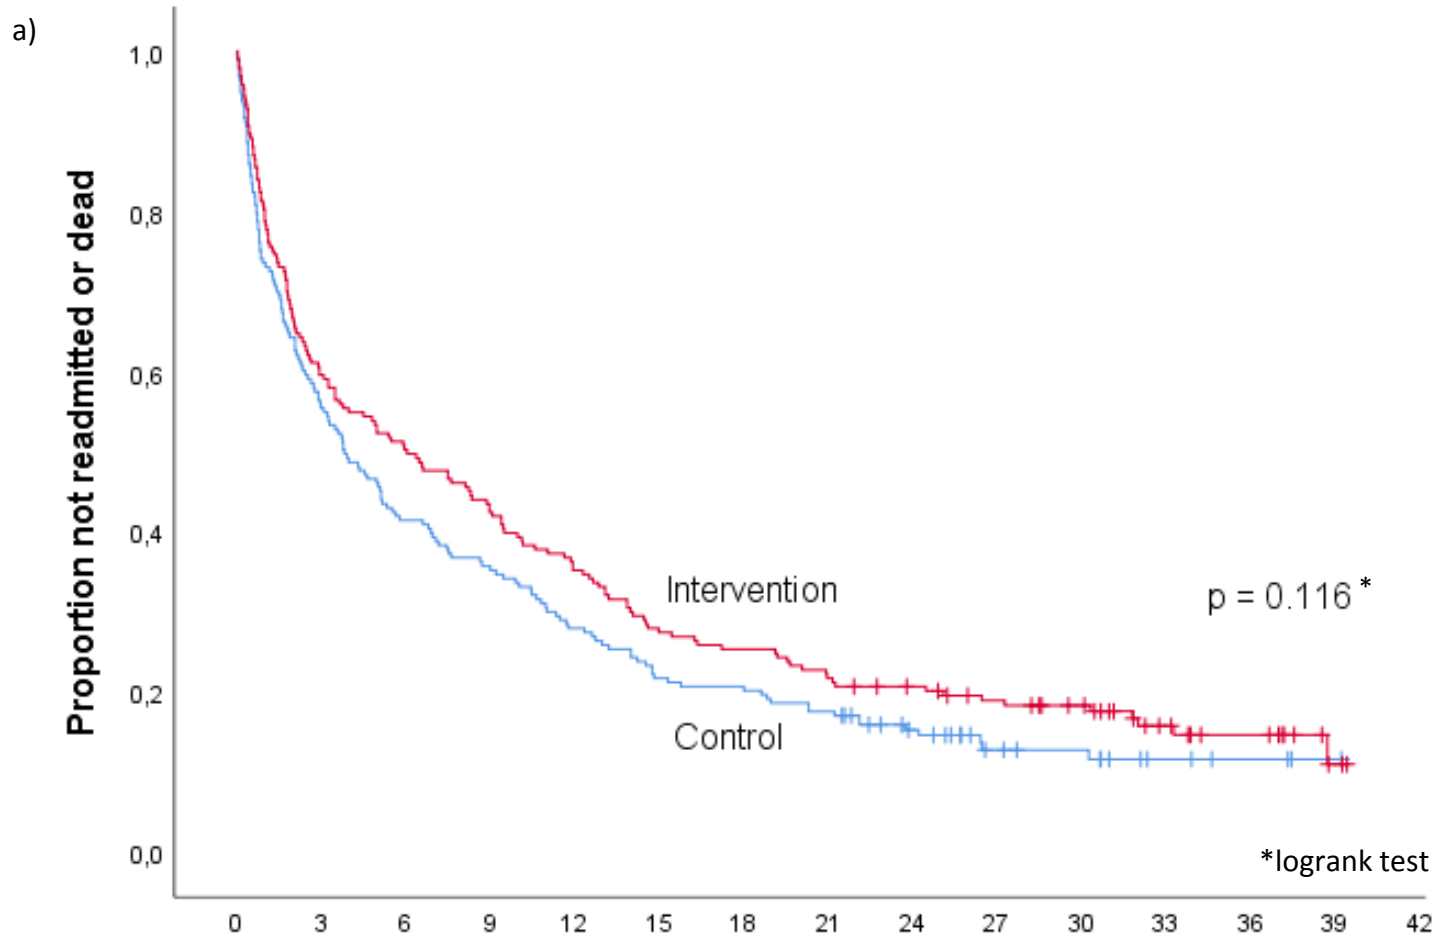

| Number at risk | Time since discharge, months |     |    |    |    |    |    |    |    |    |    |    |    |    |
|----------------|------------------------------|-----|----|----|----|----|----|----|----|----|----|----|----|----|
|                | 0                            | 3   | 6  | 9  | 12 | 15 | 18 | 21 | 24 | 27 | 30 | 33 | 36 | 39 |
| Intervention   | 193                          | 115 | 97 | 82 | 68 | 53 | 49 | 42 | 37 | 31 | 26 | 15 | 10 | 2  |
| Control        | 193                          | 107 | 80 | 69 | 54 | 42 | 40 | 34 | 23 | 13 | 11 | 5  | 3  | 1  |

1  
2  
3  
4  
5  
6  
7  
8  
9  
10  
11  
12  
13  
14  
15  
16  
17  
18  
19  
20  
21  
22  
23  
24  
25  
26  
27  
28  
29  
30  
31  
32  
33  
34  
35  
36  
37  
38  
39  
40  
41  
42  
43  
44  
45  
46

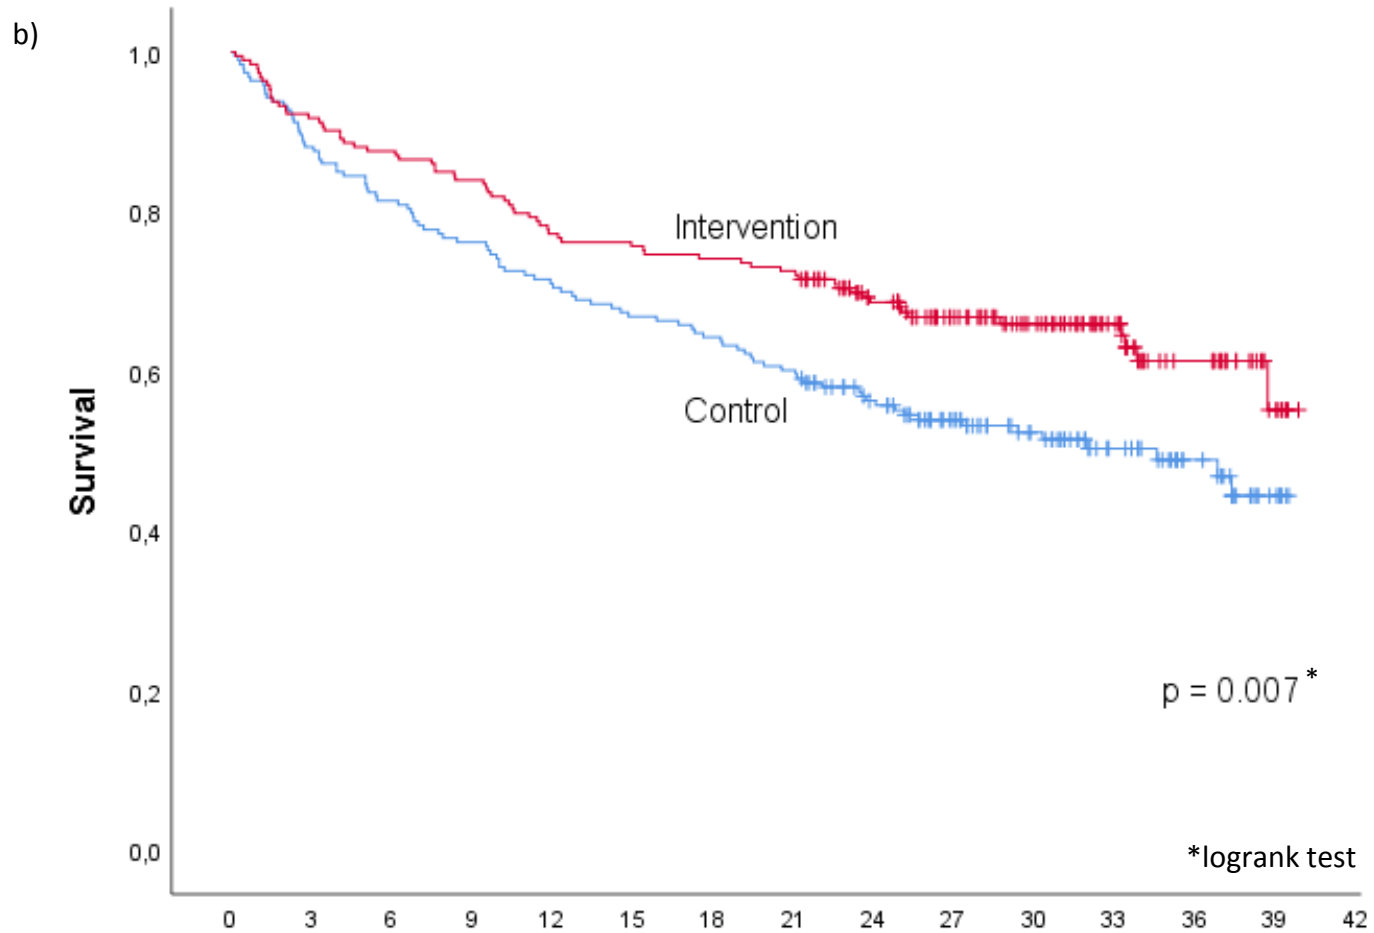

| Number at risk | Time since discharge, months |     |     |     |     |     |     |     |     |    |    |    |    |    |
|----------------|------------------------------|-----|-----|-----|-----|-----|-----|-----|-----|----|----|----|----|----|
|                | 0                            | 3   | 6   | 9   | 12  | 15  | 18  | 21  | 24  | 27 | 30 | 33 | 36 | 39 |
| Intervention   | 193                          | 177 | 169 | 162 | 149 | 146 | 143 | 140 | 115 | 93 | 73 | 49 | 27 | 8  |
| Control        | 193                          | 170 | 157 | 147 | 137 | 129 | 124 | 116 | 97  | 76 | 59 | 40 | 25 | 7  |

1  
2  
3  
4  
5  
6  
7  
8  
9  
10  
11  
12  
13  
14  
15  
16  
17  
18  
19  
20  
21  
22  
23  
24  
25  
26  
27  
28  
29  
30  
31  
32  
33  
34  
35  
36  
37  
38  
39  
40  
41  
42  
43  
44  
45  
46  
47  
48  
49  
50  
51  
52  
53  
54  
55  
56  
57  
58  
59  
60

## S1 Appendix

### Contents

|                                   |         |
|-----------------------------------|---------|
| Original trial protocol           | Page 2  |
| Protocol amendments               | Page 17 |
| Statistical analysis plan (SAP)   | Page 19 |
| SAP amendment                     | Page 28 |
| Timeline of the study, milestones | Page 29 |

For peer review only

## ORIGINAL TRIAL PROTOCOL

**English title:****Effect of a Pharmacist Intervention on Hospital Readmissions**

**A project at the Internal Medicine Ward, the Medical Clinic, Oslo University Hospital, Norway, in cooperation with Hospital Pharmacies Enterprise, South-Eastern Norway Regional Health Authority and University of Oslo, Norway**

Study protocol version number 1 – 07-04-2014

## Project members

**Project leader and co-supervisor:** Associate professor at University of Oslo, Norway, Head of the internal medicine ward at Oslo University Hospital, Norway, MD, PhD Morten Mowe, [mormow@ous-hf.no](mailto:mormow@ous-hf.no)

**PhD student and responsible study pharmacist:** Marianne Lea, MScPharm, MScClinPharm, [marianne.lea@sykehusapotekene.no](mailto:marianne.lea@sykehusapotekene.no)

**Responsible for the study:** Oslo University Hospital, Norway. Contact: Morten Mowe, head of the internal medicine ward, [mormow@ous-hf.no](mailto:mormow@ous-hf.no)

**Responsible for data processing:** Oslo University Hospital, Norway. Contact: Morten Mowe, head of the internal medicine ward, [mormow@ous-hf.no](mailto:mormow@ous-hf.no)

Other project members and collaborators:

- Espen Molden, professor at the School of Pharmacy, University of Oslo, Norway main supervisor
- Liv Mathiesen, Dr. scient, head of research and development, Hospital Pharmacies Enterprise, co-supervisor
- Kristin Hestad, section head nurse of the internal medicine ward, The Medical Clinic, Oslo University Hospital, project member
- Anne Mette Njaastad, senior physician at the internal medicine ward, The Medical Clinic, Oslo University Hospital, project member
- Kristin Thomassen, quality adviser, The Medical Clinic Oslo University Hospital, project member
- Britt Petterson, nurse at the internal medicine ward, The Medical Clinic, Oslo University Hospital, project member
- Anette Engnes, master student at the School of Pharmacy, University of Oslo, Norway, project member

Torhild Heggstad, MD, PhD, advisor in Helse-Bergen, Norway, collaborator

## Abstract

Several Norwegian studies have shown that pharmacists working in multidisciplinary treatment teams solve and prevent drug-related problems (DRP). Studies investigating the effect of pharmacist interventions on clinical relevant outcome measures are however lacking. Readmissions have both negative clinical and economic consequences, and time to the first readmission is considered as a clinical relevant outcome measure. The main aim of the current study is to investigate the effect of a pharmacist intervention, on patients' time to the first hospital readmission. The study is carried out as a randomised controlled, unblinded study. In total, 400 patients will be included.

Patients acutely admitted to the internal medicine ward at Oslo University Hospital, Ullevaal, using a minimum of 4 regular drugs from a minimum of 2 therapeutic classes (ATC level 1), will be enrolled in the study following written informed consent. The patient inclusion period starts in August 2014, and will last until the target number of patients have been included, estimated to approximately one year.

A "baseline assessment" will be conducted by a pharmacist for all included patients, consisting of medicines reconciliation and review at hospitalization, to measure frequency of DRPs at admission. Retrospectively, an assessment of whether DRPs may have led to the hospitalisation will be conducted, by comparing possible consequences of the DRPs with the admission cause.

Following the baseline assessment, the patients will be randomized to the control- or intervention group. Patients in the control group will receive in-hospital standard care, i.e. without pharmacist involved. Patients in the intervention group will receive a pharmacist intervention comprising inclusion of a pharmacist in the multidisciplinary treatment team during the hospital stay. The pharmacist will conduct medication reconciliation at admission, perform medication reviews during the hospital stay and provide drug information (written and oral) to the patient before discharge, as well as written drug information to the next level of care.

The main outcome measure is difference between the control- and intervention groups in time to the first readmission, in the intention-to-treat population. Data on readmissions will be retrieved from the Norwegian Patient Registry.

**Contents**

1

2

3

4

5 Project members ..... 3

6 Abstract ..... 4

7

8 Abbreviations: ..... 6

9

10 Introduction..... 7

11

12 Aim ..... 7

13

14 Methods ..... 7

15

16 Ethics and safety..... 14

17

18 Statistics ..... 15

19

20 Time Schedule ..... 15

21

22 Budget ..... 16

23

24

25

26

27

28

29

30

31

32

33

34

35

36

37

38

39

40

41

42

43

44

45

46

47

48

49

50

51

52

53

54

55

56

57

58

59

60

References..... 16

For peer review only

**Abbreviations:**

|      |                                  |
|------|----------------------------------|
| ATC  | Anatomical Therapeutic Chemical  |
| CIRS | Cumulative Illness Rating Scale  |
| DRP  | Drug-related problem             |
| IMM  | Integrated Medicines Management  |
| ITT  | Intention to treat               |
| MAI  | Medication Appropriateness Index |
| xPR  | x Patient Registry               |
| REK  | Regional ethics committee        |
| Ulx  | University of x                  |



## Introduction

The individual patient's drug therapy steadily becomes more complicated (1). It has been estimated that more than half of the drugs prescribed are used inappropriately, and 5-10% of admissions to internal medicine hospital wards can be attributed to inappropriate use of drugs (1). Inappropriate drug use has both clinical and economic consequences and "the Norwegian's" Medicines Agency have estimated that direct cost of hospital admissions caused by adverse drug reactions equals 300-400 million annually (1).

A significant proportion of the medication errors appear at transition points between care levels, due to missing or uncomplete information provided during transition. At hospital admission, errors in the drug lists have been reported in 85-95 % of patients (2, 3). Furthermore, up to 40% of hospitalizations in the elderly are known to be caused by adverse drug reactions, whereof the majority could be avoided (4, 5).

Pharmacists may contribute in multidisciplinary treatment teams in hospitals by tailoring and optimizing patients' drug therapy during hospitalizations, and preventing drug errors at transition points between different levels in the healthcare system (6, 7). In Norway, several studies have shown that pharmacists solve and prevent DRPs when working in multidisciplinary treatment teams in hospitals (8-10), but studies investigating the effect of such interventions on clinical relevant outcome measures is lacking. Readmissions is perceived as a burden to both patients and their relatives, in addition to being resource demanding to the society. Time to the first readmission is therefore considered as a clinical relevant outcome measure.

The internal medicine ward in the Medical Clinic at Oslo University Hospital, Norway, comprises 24 beds, and have around 100 patient admissions per month according to the annual report of the Medical Clinic, Oslo University Hospital. The patients are often multimorbid and use many drugs. The most common reasons for hospitalization are deep vein thrombosis, pulmonary embolism, diabetes and pneumonia. Due to its patient population, the internal medicine ward is a suitable place to conduct the present study.

## Aim

The main aim of this study is to investigate the effect of a pharmacist intervention on the patients' time to the first hospital readmission.

## Methods

- *Study design*  
Randomized controlled, unblinded, intervention study
- *Study location and –period*

The study will be conducted at the internal medicine ward, Oslo University Hospital, Ullevaal location, Norway. Patient inclusion will start autumn 2014, and last until the target number of patients are included. The goal is to include the target number of patients within one year. The follow-up will last for 12 months after discharge for readmissions and contact with emergency rooms, by data from the Norwegian Patient Registry, and mortality, by data from Statistics Norway.

- *Inclusion criteria*

1  
2  
3 Adult women and men acutely admitted to the internal medicine ward, using a minimum of 4  
4 regular drugs from a minimum of 2 therapeutic classes (ATC level 1) before medicines  
5 reconciliation – the latter as a surrogate for the number of diagnoses. If it is revealed during  
6 medicines reconciliation that a patient was using less than 4 regular drugs from less than 2  
7 therapeutic classes (ATC level 1) before hospitalization, the patient will be excluded from the  
8 study.  
9  
10

11 *Exclusion criteria*

- 12  
13  
14
  - Terminally ill patients
  - Patients not able to communicate in Norwegian language or English
  - Patients who do not want to participate in the study
  - Patients previously included into the study, will not be re-included during their  
19 second admission to the general internal medicine ward, neither receive the study  
20 intervention during this second hospitalization

21  
22  
23  
24
  - *Number of patients that will be included*  
25 Readmission frequencies in earlier studies in Ireland and Sweden, as well as Oslo University  
26 Hospital , is estimated to approximately 50% in a year. To be able to detect a 15% absolute  
27 reduction in readmissions, with 80% power, 168 patients must be included to both treatment  
28 groups. To account for dropouts, 200 patients will be included to both the control and the  
29 intervention groups.  
30  
31
  - *Randomization procedure*  
32 Following inclusion, patients will be allocated by a randomization sequence with a permuted  
33 block design, to the control- or intervention group. The Centre for Biostatistics and  
34 Epidemiology, Oslo University Hospital, Norway, is responsible for the randomization  
35 procedure and will deliver allocation envelopes. Study pharmacists will conduct the inclusion  
36 according to the randomizing procedure, for all included patients.  
37  
38  
39  
40  
41  
42  
43  
44  
45  
46  
47  
48  
49  
50  
51  
52  
53  
54  
55  
56  
57  
58  
59  
60

• *Flow chart and description of study arms:*

Figure 1 shows the flowchart for the study, including a description of when the different steps in the study should be conducted

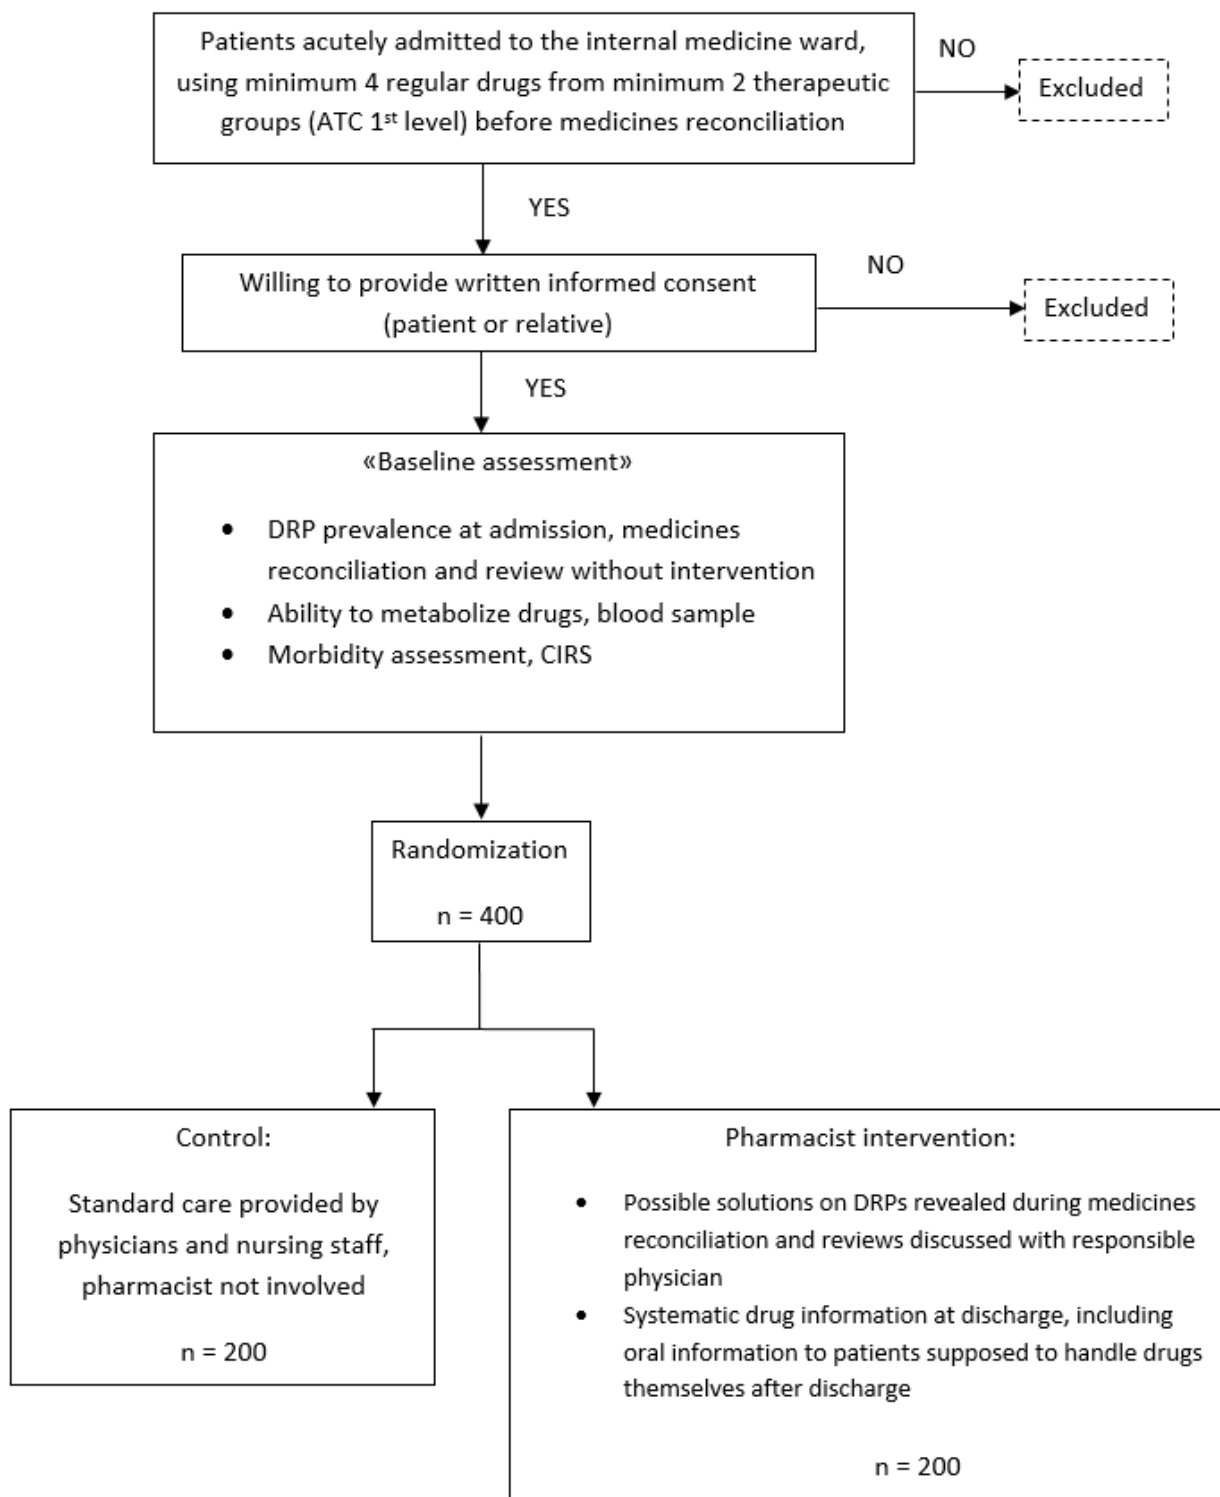

Figure 1. Overview over how the study will be conducted.

ATC = Anatomical Therapeutic Chemical, DRP = drug-related problems, CIRS = Cumulative Illness Rating Scale.

### "Baseline assessment"

For all included patients, a «baseline assessment» will be conducted, consisting of three steps:

- Assessing the DRP prevalence at admission, by conducting medicines reconciliation and –review
- Assessing the patients` ability to metabolize drugs, as determined from a blood sample
- Assessing the patients` morbidity, by using the standardized method Cumulative Illness Rating Scale (CIRS)

The "baseline assessment" will be conducted before the randomization, to avoid data collection bias.

For all included patients, a blood sample (full blood) will be sent to Center for Psychopharmacology at Diakonhjemmet Hospital, and analysed for the patient`s ability to metabolize drugs. The blood sample will be drawn as a part of standard blood tests at hospitalization. It will be investigated whether congenital variation in the ability to metabolize drugs correlates with DRP and/or morbidity. By comparing possible consequences of DRP at hospitalization, it will be investigated whether DRPs may have caused the hospitalization. A group of physicians and pharmacists will conduct these assessments in collaboration.

### Control group and intervention group

Patients randomized to the control group will receive standard care at the internal medicine ward, provided by physicians and nursing staff, without pharmacist involved. If a physician should request pharmacist advice regarding a patient randomized to the control group, a pharmacist will deliver this, and the patient will be excluded from the study.

Patients randomized to the intervention group will receive pharmacist intervention in addition to standard care during the hospital stay. This comprises inclusion of a pharmacist in the multidisciplinary treatment team around the patients, conducting the following tasks:

- 1) Discussion with physician responsible for the patient regarding possible solutions on DRPs revealed at baseline (admission) by medicines reconciliation (11) and review (12). Medicines review will be conducted repeatedly at changes in drug therapy or the patient`s clinical state.
- 2) Drug information at discharge will be written by a template where all changes in the patient`s drug list during the hospital stay will be systematically described and justified. The drug information will be approved by the hospital physician responsible for the patient`s treatment and delivered to the patient and the next care level at hospital discharge.
- 3) Oral drug information before discharge, where the aim is to improve the patient`s adherence, for patients supposed to handle drugs themselves after discharge.

### Procedures and training

1  
2  
3 The Hospital Pharmacies Enterprise's procedures for the conduct of medicines reconciliation and  
4 review will be followed during the conduct of these tasks (11, 12). The procedures are based on the  
5 "Integrated Medicines Management" (IMM)- model, for clinical pharmacists, developed in Northern  
6 Ireland (6, 13) and further developed in Sweden (14) and Central Norway (15). When working  
7 according to this model, the pharmacists' continuous and systematic evaluation of the patient's drug  
8 treatment at hospital admission (medicines reconciliation), during the hospital stay (medicines  
9 review) and at discharge (systematic drug information) is ensured. Procedures and forms are used  
10 during each step of IMM.  
11  
12  
13

14 Medicines reconciliation involves the identification of a complete and accurate list of drugs currently  
15 in use by a patient, by using different and the most optimal sources of information, including the  
16 patient, their next of kin, home care nurse, nursing home staff, pharmacy and/or general  
17 practitioner. Medicines discrepancies between drugs prescribed at hospitalization and the complete  
18 drug list, are revealed. Medicines review is a systematic review of a patients' drug treatment, using a  
19 checklist of risk categories, where the drugs' effect, safety and indications are evaluated. Potential  
20 and manifested DRPs are revealed.  
21  
22  
23

24 DRPs revealed in patients who, following the baseline assessment are allocated to the control group,  
25 will not be discussed with the physician responsible for the patient's treatment, unless they are  
26 considered by the pharmacists as being of major clinical relevance, i.e. that they may cause  
27 detrimental effects or death. If the pharmacist is in doubt regarding the severity of a DRP, the  
28 decision will be taken by the project leader Dr. nn, or the medical responsible senior physician at the  
29 internal medicine ward, nn. If DRPs with severe clinical relevance are revealed in patients allocated  
30 to the control group, they will be discussed with the ward physician responsible for patient  
31 treatment, and the patient will be excluded from the study.  
32  
33  
34

35 Clinical pharmacists conducting the pharmacist intervention in the study shall attend and get  
36 approval of training in the different working methods;  
37  
38

- 39 ○ Three day theoretical course in medicines reconciliations and reviews by IMM,  
40 followed by practical training including feedback on their individual performance  
41 provided by a clinical supervisor.
- 42 ○ The course "From monologue to dialogue – communicating with patients in  
43 theory and practice", comprising theoretical and practical training in talking with  
44 patients about drugs, with feedback from a supervisor.  
45  
46  
47  
48

- 49 ● *Demographic data and measurements*

50 The following demographic data and measurements will be registered for the study population:  
51  
52

- 53 ✓ Age
- 54 ✓ Sex
- 55 ✓ Cause of hospitalization
- 56 ✓ Diagnoses according to ICD-10, as described in the patient's medical record,  
57 i.e. diagnoses in the epicrisis, and in addition other diagnoses clearly  
58  
59  
60

described in the medical record during the hospital stay, but not listed in the epicrisis.

- ✓ Where the patient is admitted from (home, other hospital, other hospital ward in the same hospital, nursing home, emergency room, general practitioner, municipal emergency room, others)
- ✓ Assistance with handling of drugs prior to admission: nursing home, home nurse, multidose dispensed drugs, patients handling drugs themselves or not
- ✓ Hospital admission date
- ✓ Internal medicine ward admission date
- ✓ Date for last hospitalization (from the Norwegian Patient Registry)
- ✓ Date for medicines reconciliation and review conducted by pharmacist
- ✓ Drug list documented at hospital admission, including over-the-counter drugs, natural/herbal drugs (when documented). Drug name, strength, dosage, formulation (e.g. injection, rectal, oral) and time of dose.
- ✓ Drug list obtained by pharmacist, including over-the-counter drugs and natural/herbal drugs. Drug name, strength, dosage, formulation (e.g. injection, rectal, oral) and time of dose.
- ✓ Source(s) used during the medicines reconciliation (nursing home, general practitioner, multidose delivering pharmacy or next of kin)
- ✓ Drug treatment during the hospital stay
- ✓ Number and type DRPs revealed by medicines reconciliation and review, if the DRPs are discussed with the ward physician responsible for the treatment or not, and eventual results of such discussion
- ✓ Discharge date
- ✓ Where the patient is discharged to (home, other hospital, other ward at the same hospital, nursing home, others)
- ✓ Drug list at discharge. Drug name, strength, dosage, formulation (e.g. injection, rectal, oral) and time of dose.
- ✓ Results from the blood test, ability to metabolize drugs
- ✓ Morbidity at hospitalization, by using Cumulative Illness Rating Scale (CIRS)

The primary endpoint is difference between the control and intervention group in time to the first readmission, for the intention-to-treat-population. Data on readmissions will be obtained from the Norwegian Patient Registry.

Differences in clinically relevant outcome measures will be investigated between patients receiving the pharmacist intervention (intervention group) and patients not receiving pharmacist intervention (control group). Secondary endpoints will include:

- ✓ Number of readmissions during 30 days, 6 months, 12 months
- ✓ Proportion of patients readmitted during 30 days, 6 months and 12 months after discharge
- ✓ Number of contacts with emergency rooms during 30 days, 6 months and 12 months after discharge
- ✓ Proportion of patients in contact with emergency rooms during 30 days, 6 months and 12 months after discharge

- ✓ Number of days to the first readmission
- ✓ Length of stay (days) during the first readmission
- ✓ Number of days to contact with emergency room
- ✓ Mortality: Proportion of patients who dies in the 12 months after discharge
- ✓ Difference in Medicines Appropriateness Index (MAI)-score (16) from admission to discharge
- ✓ Quality of discharge drug information
- ✓ Difference in DRP prevalence (number and type of DRPs) at hospitalization
- ✓ Difference in morbidity (CIRS) at hospitalization

Further, any difference in “DRP -load” and morbidity (CIRS) at hospitalization will be investigated in patients hospitalized compared to those not hospitalized during the last 6 months before index admission. Any possible causal relationship between DRPs and hospitalizations will be assessed. Congestinal variations in ability to metabolize drugs will be assessed against “DRP-load” and/or morbidity.

The number of phone calls after discharge from the next care level to the internal medicine ward, will be measured by statistical process control (SPC).

Outcome measures including readmissions, emergency room contacts and mortality will be registered in the control- and intervention group at three points of time: 30 days, 6 months and 12 months after discharge. All cause readmissions will be registered. The main cause of readmission or contact with the emergency room will be registered. Data on readmissions and emergency room contacts will be obtained from NPR. Data on mortality will be obtained from Statistics Norway, after necessary permissions from the State Health Authority and the The Norwegian Data Protection Authority are obtained.

- *Privacy policy and information*

Patients will be enrolled following written informed consent. The physician responsible for the patient’s treatment at the hospital decides whether the patient is competent to consent or not. Written informed consent will be obtained from next of kin for patients who are not competent to consent. After written consent is obtained, the patient will be provided a study number. The enrolled patients will have the right to withdraw their consent at any time point, without giving any explanation. The participants will receive a copy of the informed consent. The information leaflet will describe that participation in the study includes extraction of data from the Norwegian Patient Registry and Statistics Norway during the first year after hospital discharge. The signed consents will be stored in a locked cabinet at the hospital together with the code list.

- *Processing and storage of data*

All data will be handled confidentially and personal, identifiable data will not be taken out of the hospital. The data will be processed without patient names or personal identification numbers, after each participant has been given a study number. The code list linking the study number to the



1  
2  
3 personal identification number, will be stored in a locked cabinet at the hospital, separately from  
4 other data. The code list will be shredded August 2018 at latest. Signed informed consents will be  
5 stored together with the code list. Study forms (paper) will be stored without patient names or  
6 personal identification numbers, in a locked cabinet and unavailable for unauthorized persons.  
7 Electronic data files will be stored without patient names or personal identification numbers, and  
8 processed in a research database at Oslo University Hospitals research server.  
9  
10  
11  
12  
13

- 14 • *Definition of analysis population*

15 An Intention-to-treat (ITT) analysis will be conducted. All randomized patients will be included in the  
16 analysis. Patients lost to follow-up will be included in the analysis as «not readmitted», «not had  
17 contact with emergency rooms». A per protocol analysis will also be conducted. Patients dying during  
18 the study period will only be included in mortality analysis.  
19  
20

## 21 **Ethics and safety**

22  
23 The study hypothesis is that pharmacists' care in the intervention group, will lead to increased quality  
24 of drug treatment compared to the control group, and that this may be reflected by reduced risk of  
25 hospital readmission after discharge. There might be a risk of lower quality drug treatment in the  
26 intervention group. We consider the probability of this to be low.  
27  
28

29 Pharmacists' care during a hospital stay is not included in standard care today. Patients in the control  
30 group will therefore be provided with the same care during their hospital stay, as they would have  
31 been provided with if they did not participate in the study. All included patients will have a  
32 conversation with a pharmacist and a blood sample will be drawn, which is not considered to cause  
33 any disadvantage to the patients. The blood sample will be drawn as a part of the samples taken due  
34 to hospitalization. Before patients are enrolled, they will receive an information leaflet of the study  
35 and they will themselves decide whether they want to participate or not.  
36  
37  
38

39 To document the effect of clinical pharmaceutical intervention in Norwegian hospitals is necessary,  
40 and randomized controlled trials are the gold standard. On this basis, it is considered necessary to  
41 randomize to a control group receiving standard care, i.e. without pharmacist involved. During  
42 standard care at the internal medicine ward, no patients receive pharmacist intervention the way it is  
43 planned conducted in the study. This means that it makes no difference for patients in the control  
44 group, whether the study is conducted or not. If potentially severe DRPs are revealed after  
45 hospitalization, they will be discussed with the responsible ward physician, and the patient will be  
46 excluded from the study. If a physician at the general internal medicine ward request a pharmacist's  
47 opinion in some degree to patients allocated to the control group, this will be provided, and the  
48 patient will be excluded from the study. In this way, the safety of patients in the control group is  
49 secured, and we hence consider the study as ethical acceptable.  
50  
51  
52  
53

54  
55 A biobank will be established, called «blood samples for analysis of drug metabolizing enzymes». The  
56 project leader is responsible for the biobank. Blood samples will be marked with the patient's study  
57 number and locked in and separated from the code list connecting patient identity to study number.  
58  
59  
60



1  
2  
3 The blood samples will be transported by a project group member from the ward at Oslo University  
4 Hospital to Center for Psychopharmacology at Diakonhjemmet Hospital, where the analysis will be  
5 conducted.  
6

7  
8 All collected data will be handled confidentially and personal identifiable data will not be taken out of  
9 the hospital. The data will be processed without patient identification, with a study number per  
10 patient. The code list connecting patient identity to study number will be locked in at the hospital  
11 and separated from other data. The code list will be deleted December 31th 2018 at the latest.  
12 Signed informed consents will be stored locked in, together with the code list. Paper versions of data  
13 registration forms will be without patient identification and stored locked in and not available for  
14 unauthorized persons. Electronical data without patient identification will be stored and processed in  
15 a research database, stored at Oslo University Hospital`s research server.  
16  
17

18  
19 Approvals from Regional committees for medical and health research ethics (REK) and the Personal  
20 Ombudsman will be obtained. For retrieval of data on mortality from Statistics Norway will necessary  
21 approvals be obtained from the State Health Authority and the The Norwegian Data Protection  
22 Authority.  
23  
24

25 There is no conflicts of interests by conducting the study.  
26

## 27 **Statistics**

28 Demographics will be presented as proportions, means with standard deviations or medians with  
29 ranges. The primary endpoint (time to first readmission) will be estimated using Kaplan Meier  
30 analysis and the groups will be compared by log rank test. The frequency endpoints will be analysed  
31 by chi square tests. Continuous variables will be analysed with Mann-Whitney tests or t-tests. A  
32 significance level at 5% will be used.  
33  
34  
35

## 36 **Time Schedule**

37 Spring 2014: Complete study protocol, clarify collaborators  
38

39 By April 8<sup>th</sup> 2014: Application to Regional committees for medical and health research ethics  
40

41 March to August 2014: Necessary training provided to clinical pharmacists  
42

43 May to June 2014: Develop and complete databases and data collection forms  
44

45 August 2014: Data inclusion start, assumed duration of patient inclusion approximately 1 year, then 1  
46 more year before data on readmissions can be retrieved  
47

48 August 2015 to December 2016: Data processing, data analysis, prepare papers  
49

50 Spring 2017: Write PhD thesis  
51

52 Autumn 2017: Submit and defend PhD thesis  
53  
54  
55  
56  
57  
58  
59  
60

## Budget

The project is assigned a PhD grant, 4 years 75% position, from South-Eastern Norway Regional Health Authority, project number 2013055. In addition, an 80% pharmacist position, funded by Oslo University Hospital and the Medical Clinic will be used into the project.

## References

1. White paper number 18 (Norway 2004-2005). [Right direction towards more optimal use of drugs.] Legemiddelpolitikken.
2. Myhr R, Kimsas A. [Medication errors when transferring within health care services]. Tidsskrift for den Norske lægeforening : tidsskrift for praktisk medicin, ny række. 1999;119(8):1087-91.
3. Midlov P, Bergkvist A, Bondesson A, Eriksson T, Hoglund P. Medication errors when transferring elderly patients between primary health care and hospital care. Pharmacy world & science : PWS. 2005;27(2):116-20.
4. Lazarou J, Pomeranz BH, Corey PN. Incidence of adverse drug reactions in hospitalized patients: a meta-analysis of prospective studies. JAMA. 1998;279(15):1200-5.
5. Beijer HJ, de Blaey CJ. Hospitalisations caused by adverse drug reactions (ADR): a meta-analysis of observational studies. Pharm World Sci. 2002;24(2):46-54.
6. Scullin C, Scott MG, Hogg A, McElnay JC. An innovative approach to integrated medicines management. Journal of evaluation in clinical practice. 2007;13(5):781-8.
7. Hellstrom LM, Bondesson A, Hoglund P, Midlov P, Holmdahl L, Rickhag E, et al. Impact of the Lund Integrated Medicines Management (LIMM) model on medication appropriateness and drug-related hospital revisits. Eur J Clin Pharmacol. 2011;67(7):741-52.
8. Blix HS, Viktil KK, Moger TA, Reikvam A. Characteristics of drug-related problems discussed by hospital pharmacists in multidisciplinary teams. Pharm World Sci. 2006;28(3):152-8.
9. Blix HS, Viktil KK, Reikvam A, Moger TA, Hjemaas BJ, Pretsch P, et al. The majority of hospitalised patients have drug-related problems: results from a prospective study in general hospitals. European journal of clinical pharmacology. 2004;60(9):651-8.
10. Viktil KK, Blix HS, Moger TA, Reikvam A. Interview of patients by pharmacists contributes significantly to the identification of drug-related problems (DRPs). Pharmacoepidemiology and drug safety. 2006;15(9):667-74.
11. Hospital Pharmacies Enterprise, South-Eastern Norway Regional Health Authority. Procedure for medicines reconciliation. Internal document.
12. Hospital Pharmacies Enterprise, South-Eastern Norway Regional Health Authority. Procedure for medicines review. Internal document.
13. Scullin C, Hogg A, Luo R, Scott MG, McElnay JC. Integrated medicines management - can routine implementation improve quality? Journal of evaluation in clinical practice. 2012;18(4):807-15.
14. Eriksson T, Holmdahl L, Bondesson Å, Midlov P, Hoglund P. [Medicine and pharmacy cooperation for more optimal use of drugs: the LIMM-model]. I vården. 2010;9:22-7.
15. Major ALS. Integrated Medicines Management in Central Norway. EJHPPractice. 2011;17(4):10-.
16. Hanlon JT, Schmader KE, Samsa GP, Weinberger M, Uttech KM, Lewis IK, et al. A method for assessing drug therapy appropriateness. Journal of clinical epidemiology. 1992;45(10):1045-51.

## PROTOCOL AMENDMENTS

June 16<sup>th</sup> 2014

Amendment to “Inclusion criteria”: To count the number of drugs from different ATC groups, all drugs marked as “used before hospital admission”, i.e. marked with “→” on the paper medical record, either by physicians at the internal medicine ward or at another hospital ward which the patient is transferred from, should be included. If the patient is transferred from another hospital ward where drugs used before hospital admission clearly are not written on the paper medical record, e.g. the intensive care unit, number of drugs described in the electronic admission record, should be counted.

August 15<sup>th</sup> 2014

Amendment to “Inclusion criteria”:

- The patient must have a Norwegian personal identification number (to be able to retrieve readmission data from the Norwegian Patient Registry)

Amendments to “Exclusion criteria”:

- Patients isolated due to severe infections
- Patients with temporary lack of consent due to acute illness, assessed by the responsible ward physician. If the patient have not handled their drugs themselves before hospitalization, and consent can be retrieved from the patients next of kin, the patient may be included.

June 7<sup>th</sup> 2016

Charlson comorbidity index (CCI) score will be used as the morbidity measure, instead of CIRS.

April 10<sup>th</sup> 2017

The data collected in the study will be used in additional analysis. The aim is to investigate which patients who will benefit most of the pharmacist intervention, and which patients that have the highest risk of hospital readmissions. We will also investigate the importance of the different components of the intervention. Data from all included patients in both the intervention and the control group will be used to investigate significant explanatory variables for the risk of readmissions.

Candidate variables will consist of both clinical and drug-related variables. A Cox regression analysis will be conducted, with “time to first readmission or death” as dependent variable.

Candidate variables will be:

- Age
- Sex
- Kidney function
- Pharmacogenetic variability in drug metabolizing enzymes
- If the patient is admitted from or discharged to a nursing home or home nurse care
- If the patient receives multidose dispensed drugs

- Length of hospital stay
- Charlson Comorbidity Index?
- Diagnoses, e.g.
  - Lung diseases
  - Heart failure
  - Coronary disease
  - Malignant disease
  - Dementia
- Drug related variables
  - Number of drugs at hospital discharge
  - Drugs in different ATC groups

The modelling will start with univariate analysis of all variables which may be associated with time to first readmission. Explanatory variables with p values < 0.2 will be included in the multivariate analysis. Dependant on the number of explanatory variables to be included in the multivariate analysis, the variables in the final model will be decided by 1) forward inclusion of one and one variable or 2) backwards elimination of one and one variable, until the model consists of only statistically significant variables.

To investigate if subgroups of patients have increased effect of the intervention, an interaction term will be added to the model, the same way as described above.

The model will be validated with data collected in a new cohort of patients from the internal medicine ward and from observational data from other internal medicine wards at hospitals in the South-Eastern Norway Regional Health Authority.

The study is approved with end-date October 31st 2017, and storing of data until October 31st 2022. Due to the planned additional analysis, new end-date will be January 1st 2020, and data will be stored until January 1st 2025.

#### May 22<sup>th</sup> 2018

According to the original protocol mortality outcome data would be retrieved 12 months after index hospital discharge for each patient. Since the inclusion period lasted 1.5 years, followed by time spent on developing of the research database, we were unable to conduct data analysis before now. The first patient was enrolled August 2014, the last March 2016. Follow-up regarding mortality will be extended to December 31<sup>th</sup> 2017 for all included patients, to increase statistical power.

#### June 26<sup>th</sup> 2018

According to the original protocol readmission outcome data would be retrieved 12 months after index hospital discharge for each patient. Since the inclusion period lasted 1.5 years, followed by time spent on developing of the research database, we were unable to conduct data analysis before now. The first patient was enrolled August 2014, the last March 2016. Follow-up regarding readmissions will be extended to December 31<sup>th</sup> 2017 for all included patients. The primary endpoint will however not be changed, but remain as detailed in the statistical analysis plan which was signed May 25<sup>th</sup> 2018.

## Statistical analysis plan – Oslo pharmacist intervention study - effect on readmissions (OPERA)

### 1. Introduction

The aim of this study is to investigate the effect of an in-hospital pharmacist intervention in multimorbid patients using at least four drugs. The study is registered in Clinicaltrials.gov (NCT02336113). Some basic elements from the study protocol are recapitulated below. The aim of this document is, prior to the conduction of analysis, to establish a detailed plan for statistical analysis, beyond what is written in the protocol.

#### *Inclusion and exclusion criteria*

Inclusion criteria were age  $\geq 18$  years, Norwegian citizen, unplanned hospitalization, and use of a minimum of four regular drugs at admission. The drugs were required to represent a minimum of two Anatomical Therapeutic Chemical (ATC) groups [1] at 1st level to enrich the inclusion of multimorbid patients.

Patients who were i) terminally ill, ii) isolated due to severe infections or iii) unable to communicate in Norwegian or English and in lack of an interpreter, were excluded. Patients readmitted during the study period were not eligible for a second inclusion. Patients, for whom medicines reconciliation revealed use of less than four regular drugs at admission, were excluded.

#### *Randomization and blinding*

The patients were randomized 1:1 to usual care or pharmacist intervention. Staff at the Centre for Biostatistics and Epidemiology, Oslo University Hospital, was responsible for the randomization procedure. This staff had no contact with the patients, study pharmacists or ward staff. A permuted block randomization was generated and delivered to the study pharmacists in sequentially numbered, opaque, sealed envelopes. Investigators were blinded to block size. In order to minimize the risk of selection bias, the randomization took place after patient inclusion, after baseline assessments were conducted. The randomization envelopes were drawn by one of the study pharmacists after controlling that the envelope with the lowest number was used.

It was not feasible to blind the patients or the study pharmacists. Nor was it feasible to blind ward staff to which patients were allocated to the pharmacist intervention group. The ward staff were however not informed of which patients that were control patients in the study. Data on readmissions were provided by The Norwegian Patient Registry and data on deaths were provided by The Norwegian Cause of Death Registry, by staff blinded for group allocation.

#### *Primary endpoint*

The primary endpoint is difference between the patient groups in time to the first unplanned hospital admission or death within 12 months after index stay discharge.

### ***Secondary endpoints***

Secondary endpoints are differences between the patient groups in:

- Time to the first unplanned readmission within 12 months after index stay discharge (censored for deaths)
- Number of unplanned and planned readmissions per patient, within 30 days, 6 months and 12 months after index discharge
- Proportion of patients unplanned hospitalized within 30 days, 6 months and 12 months after index discharge
- Proportion of patients dead or unplanned hospitalized within 30 days, 6 months and 12 months after index discharge
- Proportion of patients dead within 30 days, 6 months, 12 months and 20 months after index discharge
- Length of hospital stay of the first unplanned readmission
- Total mortality, from index discharge date until 31.12.2017
- Change in Medicines Appropriateness Index (MAI)-score [2] from index hospital admission to index hospital discharge
- Quality of drug discharge information at index hospital discharge

Some of the secondary endpoint analyses may be published in separate papers.

### ***Background variables***

The following background variables have been collected:

- Age
  - Sex
  - Reason for admission
  - Medicine administration assistance prior to admission, and after discharge, i.e. receiving drugs from a home care nurse
  - Living situation prior to admission, and after discharge, i.e. living at home or at a nursing home
  - Diagnoses (ICD-10)
  - Charlson Comorbidity Index Score [3]
  - Last hospital admission, up to 6 months prior to index stay
  - Date for index hospital admission and discharge, hence length of index stay
  - Drugs prior to admission, during hospital stay and at hospital discharge, including posology
  - Drug-related problems at baseline for all included patients
  - Drug related problems during hospital stay for intervention patients
  - Genetic variability in drug metabolizing enzymes
  - Body-mass index
  - Glomerular filtration rate
  - Serum-albumine
  - C reactive protein (CRP)
-



### ***Power calculation***

The sample size calculation was based on a previous study on a similar patient population reporting a readmission frequency of 50% in 12 months [4], as well corresponding readmission frequencies for patients discharged from the internal medicine ward (information from South-Eastern Norway Regional Health Authority). It was estimated that to detect a 15% absolute reduction in hospital readmissions with 80% power and a significance level of 5%, we would require 168 patients in each group. To compensate for any drop outs a total of 200 patients in each group were enrolled in the study.

Since a survival analyse utilizes the information better than a comparison of proportions at a given time, the power will be somewhat higher than estimated above.

### ***Patient flow***

Patient flow is illustrated in Figure 1. Figure 2 shows a further description of the 200 patients allocated to the pharmacist intervention group.

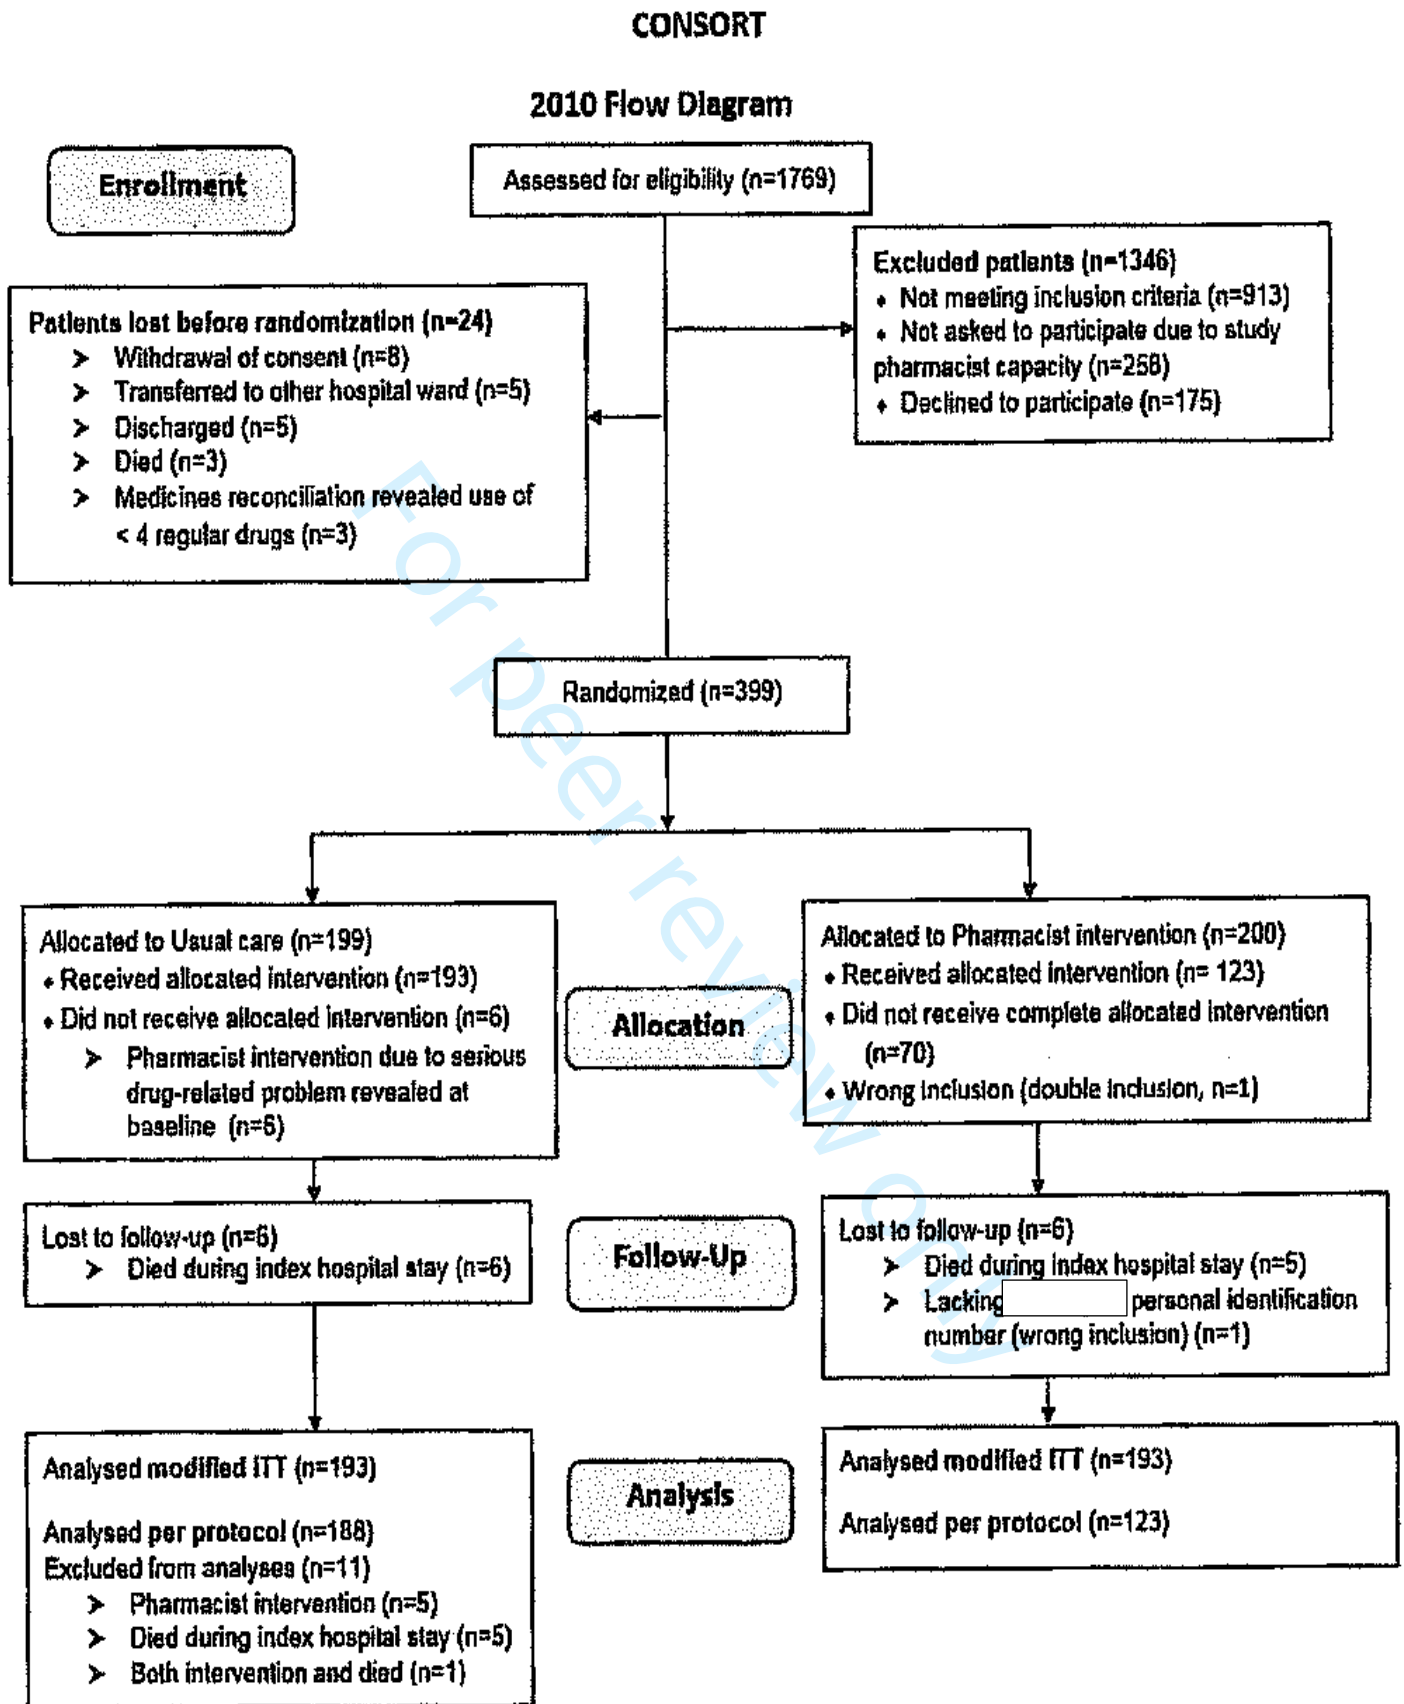

Figure 1. Patient flowchart. ITT = intention to treat.



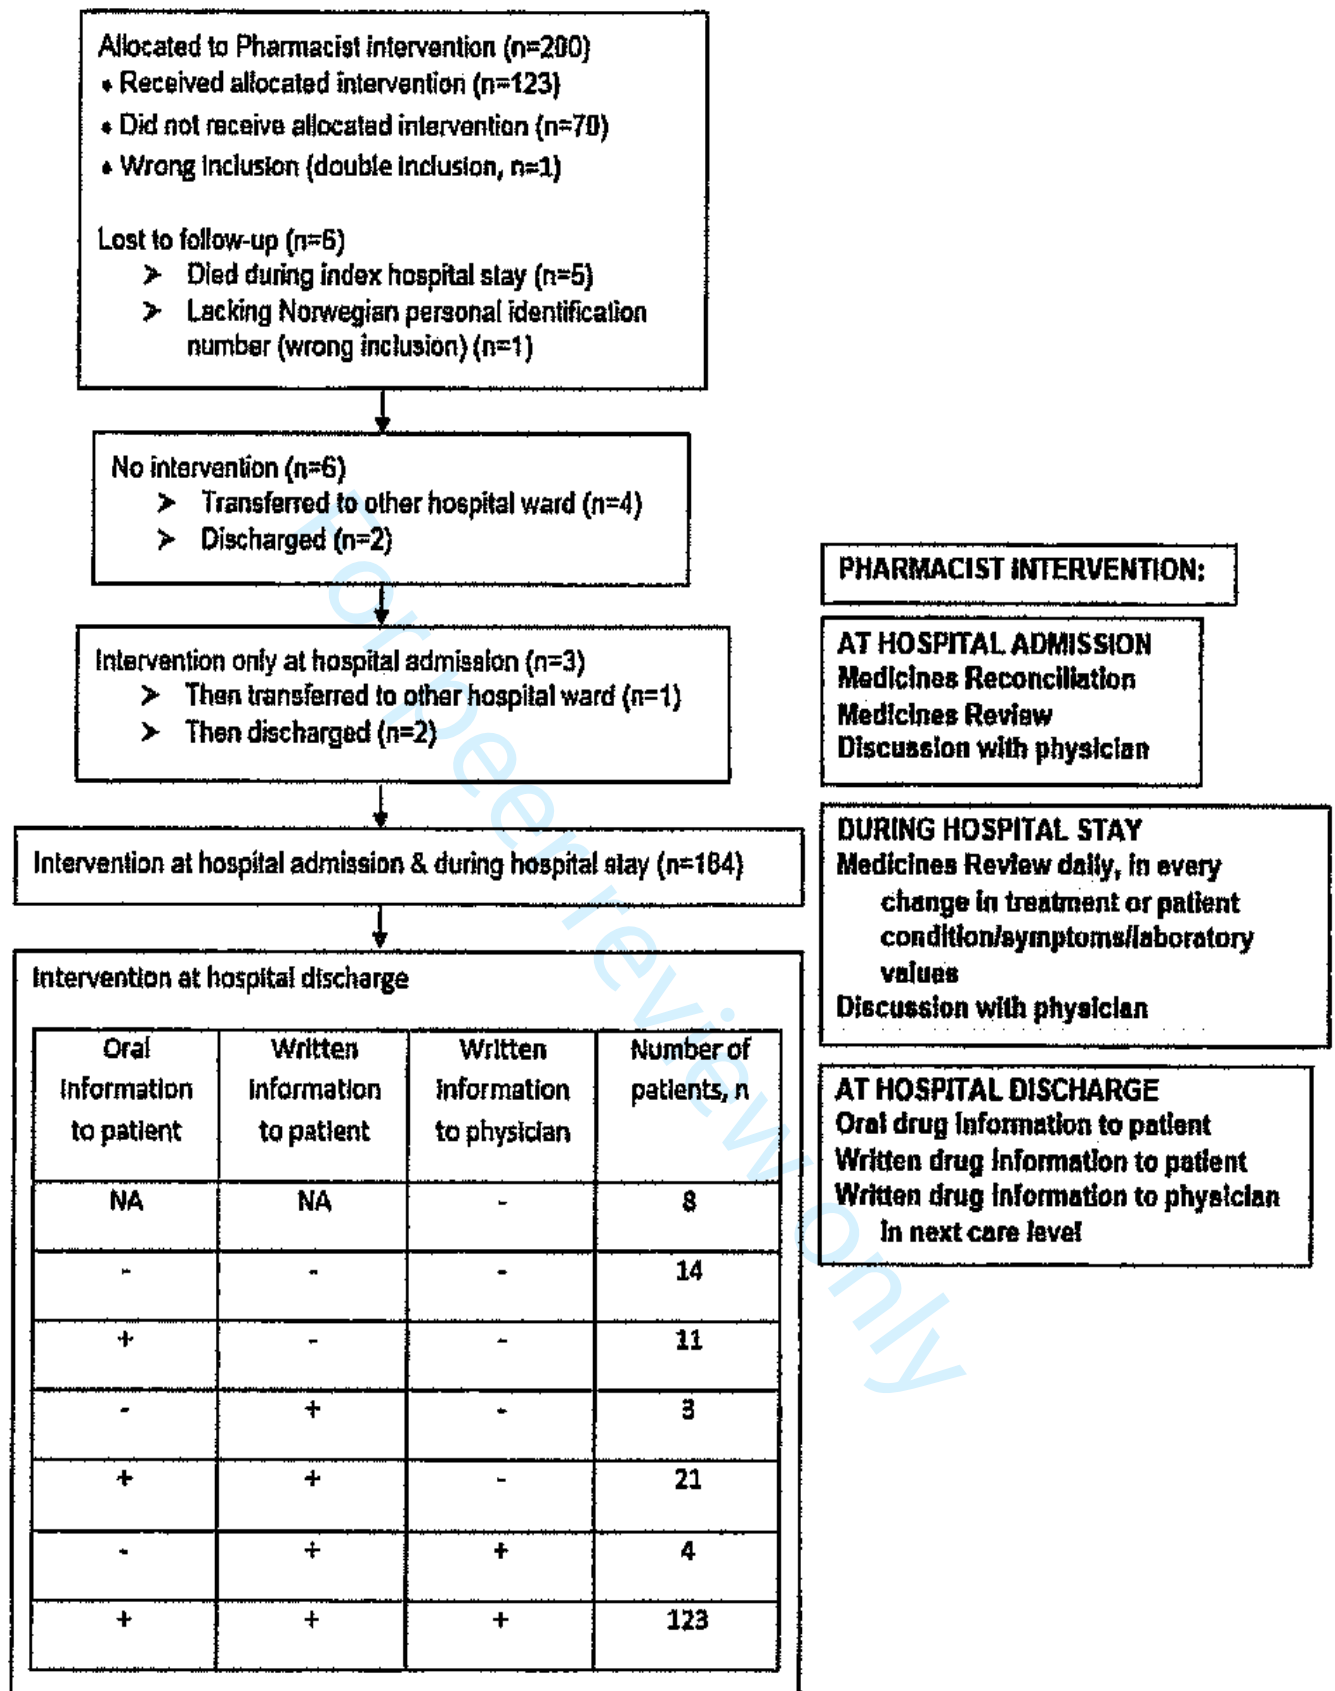

Figure 2. Flowchart further describing the patients allocated to the pharmacist intervention group. NA = not applicable.

### **Definition of analysis populations**

The primary efficacy analysis is a modified intention to treat (MITT):

- Patients who died during the index hospital stay were excluded because they never were discharged and at risk for hospital readmissions or death after discharge.
- One patient was lost to follow up due to a lack of Norwegian personal Identification number (wrong inclusion) and was excluded.
- One patient was wrongly included, in terms of being a readmitted patient, already included in the study. The second, wrong inclusion, was excluded. The patient is included in the analysis using data related to the first admission.

A per protocol (PP) analysis consists of patients that received the complete allocated intervention:

- In the control group, for patients with drug related problems revealed at baseline suspected to cause detrimental effects or death if not acted upon, the study pharmacist intervened. These patients were excluded.
- In the pharmacist intervention group, all patients receiving none or only parts of the predefined intervention were excluded.

## **2. Primary endpoint analysis**

The primary endpoint analysis will be done at the MITT population.

The primary endpoint analysis is a time-to-event analysis. The Kaplan Meier method and the log-rank test will be applied. Further, a Cox proportional hazards model will be applied to estimate hazard ratios. A p value below 0.05 will be regarded as statistically significant. Hazard ratios will be presented with 95% confidence intervals. The analysis will be performed in SPSS.

## **3. Handling of protocol violations**

### ***Wrongly included patients (n=2)***

One patient was wrongly included, lacking a Norwegian personal identification number. This identification number is essential to collect information on hospital admissions and death respectively from The Norwegian Patient Registry and The Norwegian Cause of Death Registry. We have therefore chosen to exclude this patient from the analyses.

One patient was wrongly included, in terms of being included in the study earlier, hence the second inclusion actually was a hospital readmission. The second inclusion of the patient is therefore excluded from the analyses.

### ***Patients lost before randomization (n=24)***

A few patients were lost before the randomization took place, due to different reasons listed in Figure 1. These 24 patients are will be excluded from all analyses.

### ***Randomized patients who died during the index hospital stay (n=11)***

Five patients in the intervention group and six patients in the control group died during the index hospital stay. As we defined the start point for the 12 months follow up at hospital discharge, we have chosen to exclude these 11 patients both from the MITT and PP analysis populations.

### ***Patients not handled according to randomisation***

These patients are described under the section *Definition of analysis populations*.

## **4. Handling of missing data**

No missing data on readmissions or mortality is present for the patient population MITT or PP. When data is missing in background variables, results will be presented with specified total number of patients contributing to each variable.

## **5. Sensitivity analysis**

A per protocol analyses will be performed.

## **6. Variables of adjustments**

Since the present study is a randomized controlled trial, there should by default not be done any adjustments. However, if the patients in the control and intervention group turn out to be substantially different in some of the background variables, it will be considered if adjustments have to be made, in additional analyses.

## **7. Secondary endpoint analysis**

Time to the first unplanned hospital readmission within 12 months after index discharge date, censored for deaths, will be analysed with the Kaplan Meier method and the log-rank-test. Hazard ratios with 95% confidence intervals will be estimated using a Cox proportional hazards model.

Total mortality will be analysed as a time-to-event analysis. To exploit the long time period of both inclusion and follow up in the study, all patients will be followed until 31.12.2017 regarding total mortality. The Kaplan Meier method and the log-rank test will be applied. Further, a Cox proportional hazards model will be applied to estimate hazard ratios. Hazard ratios will be presented with 95% confidence intervals.

Continuous variables will be analysed by two-sample t-tests. If extreme outliers are identified, variables will be analysed with the Mann-Whitney test. Proportions will be analysed with the Chi square test.

All analyses will be performed in SPSS. P values below 0.05 will be regarded as statistically significant.

## 8. Blind analysis

The project administrator and PhD student (ML) has been one of the main study pharmacists, as well as building the research database, has in depth knowledge of the data files, and may recognize whether the patient is in the control or intervention group. Neither the main supervisor (LM) nor the statistician (ES) have been involved in data collection, data punching or in preparation of the data files to statistical analyses.

To maintain blind analyses and prevent bias due to the expectations of the project administrator, data analyses on the primary endpoint, will be performed as follows: ML prepares the data files replacing a random letter to patients in the control group and another random letter to the patients in the intervention group. This new allocation code is written and stored safely and not provided to LM or ES. LM and ES receive the dataset with the new code for the allocated group and carry out the primary analysis. When the statistical analysis is finalized, group allocation will be unblinded by ML, with LM and ES present.

## 9. References

1. World Health Organization (WHO) Collaboration Centre for Drug Statistics Methodology, ATC/DDD Index. [cited 2018 03.04]. Available from: [https://www.whocc.no/atc\\_ddd\\_index/](https://www.whocc.no/atc_ddd_index/).
2. Hanlon JT, Schmader KE, Samsa GP, Weinberger M, Uttech KM, Lewis IK, et al. A method for assessing drug therapy appropriateness. *J Clin Epidemiol.* 1992;45(10):1045-51.
3. Charlson ME, Pompei P, Ales KL, MacKenzie CR. A new method of classifying prognostic comorbidity in longitudinal studies: development and validation. *J Chronic Dis.* 1987;40(5):373-83.
4. Scullin C, Scott MG, Hogg A, McElnay JC. An innovative approach to integrated medicines management. *J Eval Clin Pract.* 2007;13(5):781-8.

## 10. Signatures

We hereby vouch for the fidelity of the study to this statistical analysis plan.

Oslo and Trondheim, Norway, 25 th May 2018



**Marianne Lea, MSc, PhD student**

**Project administrator**

**Hospital Pharmacies Enterprise, South Eastern Norway & University of Oslo**



**Eva Skovlund, MSc, PhD**

**Professor of medical statistics**

**Norwegian University of Science and Technology, NTNU**



**Liv Mathiesen, MSc, PhD**

**Associate professor in clinical pharmacy**

**Main supervisor**

**University of Oslo**



### Statistical analysis plan amendment 30<sup>th</sup> May 2018

We discovered that one of the secondary endpoints not was in accordance with a change we made 2<sup>th</sup> May 2018 after discussions with and recommendations from the Norwegian patients registry (NPR). The following secondary endpoint will therefore be changed from:

- Number of unplanned and planned readmissions per patients within 30 days, 6 months and 12 months after index discharge

to:

- Number of unplanned readmissions per patient within 12 months after index discharge

Documentation:

Excerpt of email correspondence with NPR 2<sup>th</sup> May 2018:

---

**Fra:** Marianne Lea [<mailto:mlea10@hotmail.com>]  
**Sendt:** 2. mai 2018 08:50  
**Til:** Trude Solbakken  
**Emne:** Re: SV: SV: [17/20673](#) Søknad om data fra NPR

Hei,

Bra!

Ja, har forstått at dere ikke har data på legevakt/KADer, men at dere hadde info på om sykehusinnleggelsen var akutt eller planlagt? I forhold til reinnleggelser er det akutte innleggelser vi er ute etter, ikke planlagte/elektive.

Hilsen Marianne

2. mai 2018 kl. 08:41 skrev Trude Solbakken  
<[Trude.Solbakken@helseidir.no](mailto:Trude.Solbakken@helseidir.no)>:

Excerpt of letter from (original correspondence 13.12.2017)

Avdeling helseregistre skal motta utvalget fra søker. I forbindelse med gjennomgang av søknaden og dialog med søker (08.12.2017 og 12.12.2017) tas det sikte på at det skal utleveres opplysninger om følgende forhold:

- Tidspunkter for innleggelser og utskrivelser for evt siste sykehusopphold de siste 12 mnd før innleggingsdatoen i studien
- Antall sykehusinnleggelser de siste 6 månedene før innleggingsdatoen i studien
- Tidspunkter for innleggelser og utskrivelser for første gjeninnleggelse på sykehus etter utskrivelsesdatoen i studien
- Antall gjeninnleggelser i løpet av 12 måneder etter utskrivelsesdatoen i studien
- Hovedårsak til første gjeninnleggelse
- Antall kontakter med legevakt i løpet av 12 måneder etter utskrivelsesdatoen i studien

Søker er orientert om at det ikke er mulig å skille mellom legevakt og sykehus, men at det finnes informasjon om kontakten/innleggelsen er ø-hjelp eller planlagt.

## TIMELINE OF THE STUDY, MILESTONES

August 15, 2012: Original Trial protocol written

December 20, 2012: Received funding - PhD grant

March 2013 to December 2013: Maternity leave PhD student

January to August 2014 - Practical planning of data inclusion period

May 2014: Necessary approvals obtained

June 2014: Registration of the trial, based on the original trial protocol, in [clinicaltrials.gov](http://clinicaltrials.gov), identifier: NCT02336113. The trial was published on [clinicaltrials.gov](http://clinicaltrials.gov)'s website in January 2015.\*

August 30, 2014: Patient inclusion started

March 17, 2016: Patient inclusion completed

December 31, 2017: Last day of follow-up on readmissions and mortality

June 2017 to May 2018 Application process for outcome data to the Patient Registers\*\*

May 25, 2018: Statistical analysis plan was finalized and signed, hereunder analysis population defined and endpoint analyses detailed

May 29 to June 6, 2018 Outcome data files from Patient registries prepared for analysis

June 8, 2018 Blinded outcome analyses conducted

\* Due to a minor Protocol Registration and Results System (PRS) review comment. However, a clarification in the outcome measure, i.e. that readmission data should be collected from the Norwegian Patient Registry, was the only addition made from the original registration made in June 2014.

\*\*Huge workload at the Registers entails a very long processing time for outcome data.

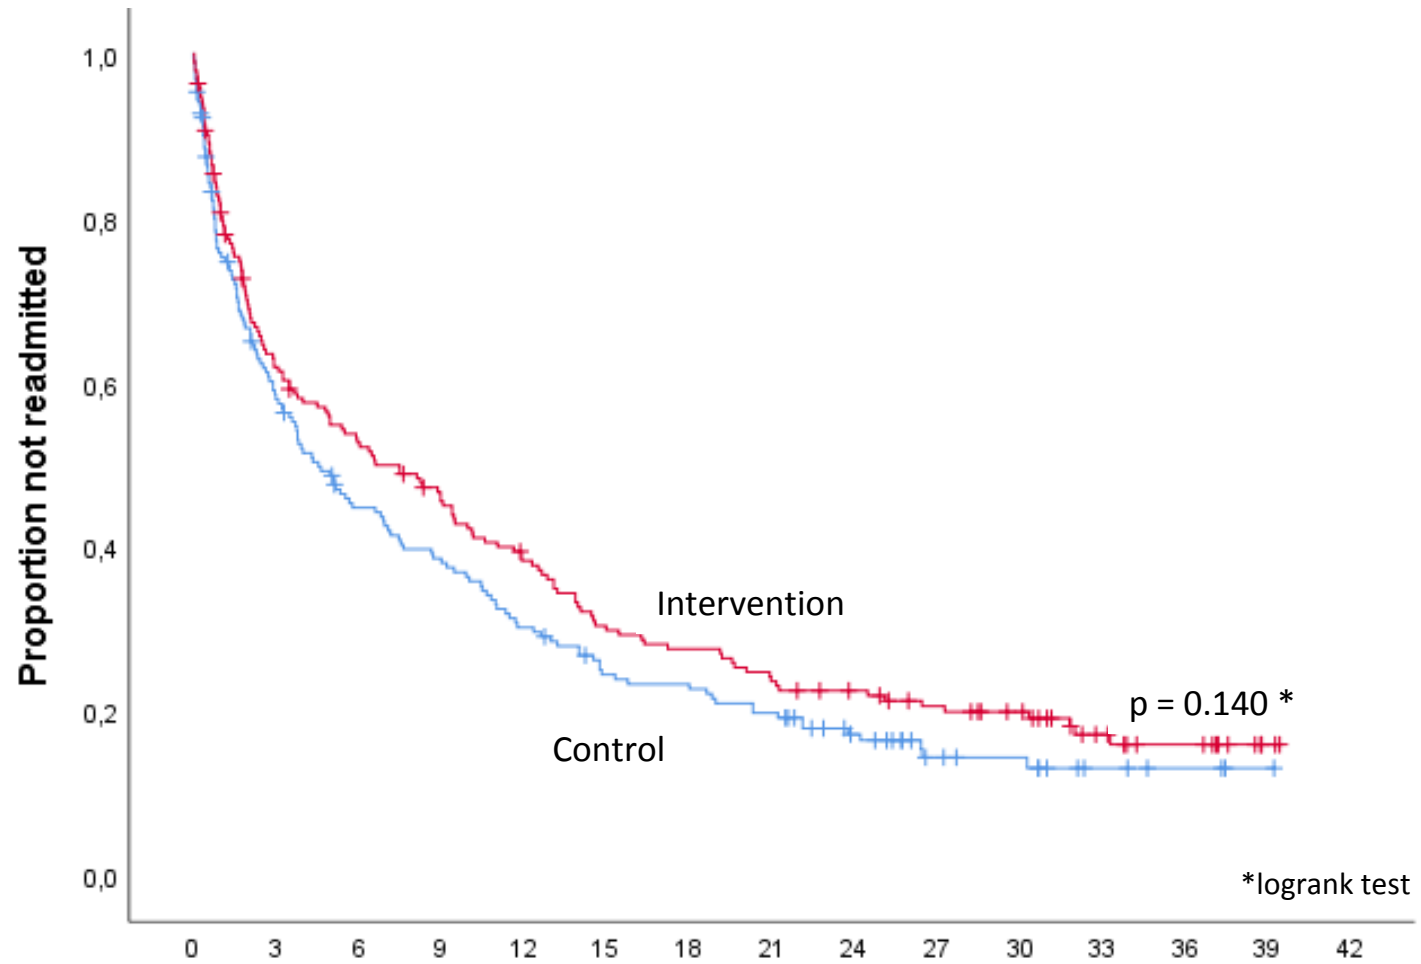

|                |  | Time since discharge, months |     |    |    |    |    |    |    |    |    |    |    |    |    |
|----------------|--|------------------------------|-----|----|----|----|----|----|----|----|----|----|----|----|----|
| Number at risk |  | 0                            | 3   | 6  | 9  | 12 | 15 | 18 | 21 | 24 | 27 | 30 | 33 | 36 | 39 |
| Intervention   |  | 193                          | 115 | 97 | 82 | 68 | 53 | 49 | 42 | 37 | 31 | 26 | 15 | 10 | 2  |
| Control        |  | 193                          | 107 | 80 | 69 | 54 | 42 | 40 | 34 | 23 | 13 | 11 | 5  | 3  | 1  |



## CONSORT CHECKLIST

**Table.** CONSORT 2010 Checklist of Information to Include When Reporting a Randomized Trial<sup>a</sup>

| Section and Topic                                    | Item No. | Checklist Item                                                                                                                                                                              | Reported on Page No. |
|------------------------------------------------------|----------|---------------------------------------------------------------------------------------------------------------------------------------------------------------------------------------------|----------------------|
| <b>Title and abstract</b>                            | 1a       | Identification as a randomized trial in the title                                                                                                                                           |                      |
|                                                      | 1b       | Structured summary of trial design, methods, results, and conclusions (for specific guidance see CONSORT for abstracts)                                                                     |                      |
| <b>Introduction</b>                                  |          |                                                                                                                                                                                             |                      |
| Background and objectives                            | 2a       | Scientific background and explanation of rationale                                                                                                                                          |                      |
|                                                      | 2b       | Specific objectives or hypotheses                                                                                                                                                           |                      |
| <b>Methods</b>                                       |          |                                                                                                                                                                                             |                      |
| Trial design                                         | 3a       | Description of trial design (such as parallel, factorial) including allocation ratio                                                                                                        |                      |
|                                                      | 3b       | Important changes to methods after trial commencement (such as eligibility criteria), with reasons                                                                                          |                      |
| Participants                                         | 4a       | Eligibility criteria for participants                                                                                                                                                       |                      |
|                                                      | 4b       | Settings and locations where the data were collected                                                                                                                                        |                      |
| Interventions                                        | 5        | The interventions for each group with sufficient details to allow replication, including how and when they were actually administered                                                       |                      |
| Outcomes                                             | 6a       | Completely defined prespecified primary and secondary outcome measures, including how and when they were assessed                                                                           |                      |
|                                                      | 6b       | Any changes to trial outcomes after the trial commenced, with reasons                                                                                                                       |                      |
| Sample size                                          | 7a       | How sample size was determined                                                                                                                                                              |                      |
|                                                      | 7b       | When applicable, explanation of any interim analyses and stopping guidelines                                                                                                                |                      |
| Randomization                                        |          |                                                                                                                                                                                             |                      |
| Sequence generation                                  | 8a       | Method used to generate the random allocation sequence                                                                                                                                      |                      |
|                                                      | 8b       | Type of randomization; details of any restriction (such as blocking and block size)                                                                                                         |                      |
| Allocation concealment mechanism                     | 9        | Mechanism used to implement the random allocation sequence (such as sequentially numbered containers), describing any steps taken to conceal the sequence until interventions were assigned |                      |
| Implementation                                       | 10       | Who generated the random allocation sequence, who enrolled participants, and who assigned participants to interventions                                                                     |                      |
| Blinding                                             | 11a      | If done, who was blinded after assignment to interventions (for example, participants, care providers, those assessing outcomes) and how                                                    |                      |
|                                                      | 11b      | If relevant, description of the similarity of interventions                                                                                                                                 |                      |
| Statistical methods                                  | 12a      | Statistical methods used to compare groups for primary and secondary outcomes                                                                                                               |                      |
|                                                      | 12b      | Methods for additional analyses, such as subgroup analyses and adjusted analyses                                                                                                            |                      |
| <b>Results</b>                                       |          |                                                                                                                                                                                             |                      |
| Participant flow (a diagram is strongly recommended) | 13a      | For each group, the numbers of participants who were randomly assigned, received intended treatment, and were analyzed for the primary outcome                                              |                      |
|                                                      | 13b      | For each group, losses and exclusions after randomization, together with reasons                                                                                                            |                      |
| Recruitment                                          | 14a      | Dates defining the periods of recruitment and follow-up                                                                                                                                     |                      |
|                                                      | 14b      | Why the trial ended or was stopped                                                                                                                                                          |                      |
| Baseline data                                        | 15       | A table showing baseline demographic and clinical characteristics for each group                                                                                                            |                      |
| Numbers analyzed                                     | 16       | For each group, number of participants (denominator) included in each analysis and whether the analysis was by original assigned groups                                                     |                      |
| Outcomes and estimation                              | 17a      | For each primary and secondary outcome, results for each group, and the estimated effect size and its precision (such as 95% confidence interval)                                           |                      |
|                                                      | 17b      | For binary outcomes, presentation of both absolute and relative effect sizes is recommended                                                                                                 |                      |
| Ancillary analyses                                   | 18       | Results of any other analyses performed, including subgroup analyses and adjusted analyses, distinguishing prespecified from exploratory                                                    |                      |
| Harms                                                | 19       | All important harms or unintended effects in each group (for specific guidance see CONSORT for harms)                                                                                       |                      |
| <b>Comment</b>                                       |          |                                                                                                                                                                                             |                      |
| Limitations                                          | 20       | Trial limitations, addressing sources of potential bias, imprecision, and, if relevant, multiplicity of analyses                                                                            |                      |
| Generalizability                                     | 21       | Generalizability (external validity, applicability) of the trial findings                                                                                                                   |                      |
| Interpretation                                       | 22       | Interpretation consistent with results, balancing benefits and harms, and considering other relevant evidence                                                                               |                      |
| <b>Other information</b>                             |          |                                                                                                                                                                                             |                      |
| Registration                                         | 23       | Registration number and name of trial registry                                                                                                                                              |                      |
| Protocol                                             | 24       | Where the full trial protocol can be accessed, if available                                                                                                                                 |                      |
| Funding                                              | 25       | Sources of funding and other support (such as supply of drugs), role of funders                                                                                                             |                      |

<sup>a</sup>We strongly recommend reading this statement in conjunction with the CONSORT 2010 Explanation and Elaboration for important clarifications on all the items. If relevant, we also recommend reading CONSORT extensions for cluster randomized trials, noninferiority and equivalence trials, nonpharmacological treatments, herbal interventions, and pragmatic trials. Additional extensions are forthcoming: for those and for up-to-date references relevant to this checklist, see <http://www.consort-statement.org>.

# BMJ Open

## Effect of medicines management versus standard care on readmissions in multimorbid patients: A randomized controlled trial

|                                 |                                                                                                                                                                                                                                                                                                                                                                                                                                                                                                                                                                                                                                                                                                                                                                                                                                                                                                          |
|---------------------------------|----------------------------------------------------------------------------------------------------------------------------------------------------------------------------------------------------------------------------------------------------------------------------------------------------------------------------------------------------------------------------------------------------------------------------------------------------------------------------------------------------------------------------------------------------------------------------------------------------------------------------------------------------------------------------------------------------------------------------------------------------------------------------------------------------------------------------------------------------------------------------------------------------------|
| Journal:                        | <i>BMJ Open</i>                                                                                                                                                                                                                                                                                                                                                                                                                                                                                                                                                                                                                                                                                                                                                                                                                                                                                          |
| Manuscript ID                   | bmjopen-2020-041558.R1                                                                                                                                                                                                                                                                                                                                                                                                                                                                                                                                                                                                                                                                                                                                                                                                                                                                                   |
| Article Type:                   | Original research                                                                                                                                                                                                                                                                                                                                                                                                                                                                                                                                                                                                                                                                                                                                                                                                                                                                                        |
| Date Submitted by the Author:   | 04-Oct-2020                                                                                                                                                                                                                                                                                                                                                                                                                                                                                                                                                                                                                                                                                                                                                                                                                                                                                              |
| Complete List of Authors:       | Lea, Marianne; Hospital Pharmacy Enterprise, Department of Pharmaceutical Services, Oslo Hospital Pharmacy<br>Mowe, Morten; Oslo University Hospital, General Internal Medicine Ward, the Medical Clinic; University of Oslo Faculty of Medicine<br>Molden, Espen; University of Oslo, Department of Pharmacy, Section for Pharmacology and Pharmaceutical Biosciences; Diakonhjemmet Hospital, Center for Psychopharmacology<br>Kvernørød, Kristin; Hospital Pharmacy Enterprise, Department of Pharmaceutical Services, Oslo Hospital Pharmacy<br>Skovlund, Eva; Norwegian University of Science and Technology, Department of Public Health and Nursing, Faculty of Medicine and Health Sciences<br>Mathiesen, Liv ; Universitetet i Oslo Det Matematisk-naturvitenskapelige Fakultet, Department of Pharmacy, Section for Pharmacology and Pharmaceutical Biosciences,; Hospital Pharmacy Enterprise |
| <b>Primary Subject Heading</b>: | Health services research                                                                                                                                                                                                                                                                                                                                                                                                                                                                                                                                                                                                                                                                                                                                                                                                                                                                                 |
| Secondary Subject Heading:      | Medical management, Pharmacology and therapeutics, Public health                                                                                                                                                                                                                                                                                                                                                                                                                                                                                                                                                                                                                                                                                                                                                                                                                                         |
| Keywords:                       | Quality in health care < HEALTH SERVICES ADMINISTRATION & MANAGEMENT, INTERNAL MEDICINE, PUBLIC HEALTH, THERAPEUTICS, CLINICAL PHARMACOLOGY                                                                                                                                                                                                                                                                                                                                                                                                                                                                                                                                                                                                                                                                                                                                                              |
|                                 |                                                                                                                                                                                                                                                                                                                                                                                                                                                                                                                                                                                                                                                                                                                                                                                                                                                                                                          |

SCHOLARONE™  
Manuscripts



I, the Submitting Author has the right to grant and does grant on behalf of all authors of the Work (as defined in the below author licence), an exclusive licence and/or a non-exclusive licence for contributions from authors who are: i) UK Crown employees; ii) where BMJ has agreed a CC-BY licence shall apply, and/or iii) in accordance with the terms applicable for US Federal Government officers or employees acting as part of their official duties; on a worldwide, perpetual, irrevocable, royalty-free basis to BMJ Publishing Group Ltd ("BMJ") its licensees and where the relevant Journal is co-owned by BMJ to the co-owners of the Journal, to publish the Work in this journal and any other BMJ products and to exploit all rights, as set out in our [licence](#).

The Submitting Author accepts and understands that any supply made under these terms is made by BMJ to the Submitting Author unless you are acting as an employee on behalf of your employer or a postgraduate student of an affiliated institution which is paying any applicable article publishing charge ("APC") for Open Access articles. Where the Submitting Author wishes to make the Work available on an Open Access basis (and intends to pay the relevant APC), the terms of reuse of such Open Access shall be governed by a Creative Commons licence – details of these licences and which [Creative Commons](#) licence will apply to this Work are set out in our licence referred to above.

Other than as permitted in any relevant BMJ Author's Self Archiving Policies, I confirm this Work has not been accepted for publication elsewhere, is not being considered for publication elsewhere and does not duplicate material already published. I confirm all authors consent to publication of this Work and authorise the granting of this licence.

1  
2  
3 1 **TITLE PAGE**  
4  
5

6 2  
7  
8 3 **TITLE**  
9

10 4 Effect of medicines management versus standard care on readmissions in  
11 5 multimorbid patients: A randomized controlled trial  
12  
13 6  
14  
15 7  
16  
17 8  
18

19 9 **AUTHORS**

20  
21 10 Marianne Lea\* (PhD)<sup>1</sup>, Morten Mowe (PhD)<sup>2,3</sup>, Espen Molden (PhD)<sup>4,5</sup>, Kristin Kvernørød (MSc)<sup>1</sup>, Eva  
22 11 Skovlund (PhD)<sup>6</sup> and Liv Mathiesen (PhD)<sup>5,7</sup>  
23

24 12 <sup>1</sup> Department of Pharmaceutical Services, Oslo Hospital Pharmacy, Hospital Pharmacies Enterprise,  
25 13 South Eastern Norway, Oslo, Norway

26  
27 14 <sup>2</sup> General Internal Medicine Ward, the Medical Clinic, Oslo University Hospital, Oslo, Norway

28  
29 15 <sup>3</sup> Faculty of Medicine, University of Oslo, Oslo, Norway

30  
31 16 <sup>4</sup> Center for Psychopharmacology, Diakonhjemmet Hospital, Oslo, Norway

32  
33 17 <sup>5</sup> Department of Pharmacy, Section for Pharmacology and Pharmaceutical Biosciences, University of  
34 18 Oslo, Oslo, Norway

35  
36 19 <sup>6</sup> Department of Public Health and Nursing, Faculty of Medicine and Health Sciences, Norwegian  
37 20 University of Science and Technology, NTNU, Trondheim, Norway

38  
39 21 <sup>7</sup> Hospital Pharmacies Enterprise, South Eastern Norway, Oslo, Norway  
40

41 22  
42  
43 23 \*Corresponding author

44 24 *Address:* Department of Pharmaceutical Services, Oslo Hospital Pharmacy, Kirkeveien 166, 0450 Oslo,  
45 25 Norway

46  
47 26 *Phone:* + 47- 23 20 52 94

48  
49 27 E-mail: [marianne.lea@sykehusapotekene.no](mailto:marianne.lea@sykehusapotekene.no)  
50

51 28  
52  
53 29  
54  
55 30 **WORD COUNT:** 3779  
56

57 31  
58  
59 32 **CATEGORY:** Original research  
60

1  
2  
3 **33 ABSTRACT**  
4

5 **34 Objective:** To investigate the effect of pharmacist-led medicines management in  
6  
7  
8 **35** multimorbid, hospitalized patients on long-term hospital readmissions and survival.  
9

10  
11 **36 Design:** Parallel-group, randomized controlled trial.  
12

13  
14 **37 Setting:** Recruitment from an internal medicine hospital ward in Oslo, Norway. Patients were  
15  
16 **38** enrolled consecutively from August 2014 until the predetermined target number of 400  
17  
18 **39** patients. The last participant was enrolled March 2016. Follow-up until December 31, 2017,  
19  
20 **40** i.e. 21-40 months.  
21  
22

23  
24 **41 Participants:** Acutely admitted multimorbid patients  $\geq 18$  years, using minimum four regular  
25  
26 **42** drugs from minimum two therapeutic classes. 399 patients were randomly assigned, 1:1, to  
27  
28 **43** the intervention or control group. After excluding 11 patients dying in-hospital and 2  
29  
30 **44** erroneously included, the primary analysis comprised 386 patients (193 in each group) with  
31  
32 **45** median age 79 years (range 23-96) and number of diseases 7 (range 2-17).  
33  
34  
35  
36

37 **46 Intervention:** Intervention patients received pharmacist-led medicines management  
38  
39 **47** comprising medicines reconciliation at admission, repeated medicines reviews throughout  
40  
41 **48** the stay and medicines reconciliation and tailored information at discharge, according to the  
42  
43 **49** Integrated Medicines Management (IMM) model. Control patients received standard care.  
44  
45  
46

47 **50 Primary and secondary outcome measures:** The primary endpoint was difference in time to  
48  
49 **51** readmission or death within 12 months. Overall survival was a priori the clinically most  
50  
51 **52** important secondary endpoint.  
52  
53  
54

55 **53 Results:** Pharmacist-led medicines management had no significant effect on the primary  
56  
57 **54** endpoint time to readmission or death within 12 months (median 116 versus 184 days, HR  
58  
59  
60

1  
2  
3 55 0.82, 95% CI 0.64 to 1.04, p=0.106). A statistically significantly increased overall survival was  
4  
5  
6 56 observed during 21-40 months follow-up (HR 0.66, 95% CI 0.48 to 0.90, p=0.008).  
7

8  
9 57 **Conclusions:** Pharmacist-led medicines management had no statistically significant effect on  
10  
11 58 time until readmission or death. A statistically significant increased overall survival was seen.  
12  
13 59 Further studies should be conducted to investigate the effect of such an intervention on a  
14  
15  
16 60 larger scale.  
17

18  
19 61 **Trial Registration:** ClinicalTrials.gov-Identifier:NCT02336113, closed for new participants.  
20  
21

22 62  
23  
24

25 63  
26  
27

28 64  
29  
30

## 31 65 **ARTICLE SUMMARY**

32  
33

### 34 66 **Strengths and limitations of this study**

35  
36

- 37  
38 67 • Randomized controlled design, blinded in the steps possible to blind  
39  
40 68 • Included almost 200 high-risk multimorbid patients in each group and followed them  
41  
42  
43 69 for 20-41 months  
44  
45 70 • Hard endpoints, readmissions and mortality, collected from national registers  
46  
47  
48 71 • Inclusion from a single hospital in Norway  
49  
50 72 • Spill-over effect may have reduced the effect estimate  
51  
52

53 73  
54

55  
56 74 **KEYWORDS:** multimorbid patients, integrated medicines management, pharmacist-led,  
57  
58 75 internal medicine, hospital readmissions, survival  
59  
60

## 76 INTRODUCTION

77 Increased life expectancy and steadily improving healthcare contribute to a growing  
78 subpopulation of multimorbid patients, commonly defined as having a minimum of two  
79 conditions.[1-3] The prevalence of multimorbidity is reported to be 20-30% in the general  
80 population, 55-98% in the elderly and 22-65% in hospitalized patients.[4-6] Multimorbidity is  
81 associated with the use of multiple drugs, increased use of healthcare services and reduced  
82 life expectancy.[3, 7-9] The organization of healthcare services and treatment guidelines is  
83 however mainly focused on single diagnoses, while coexisting diagnoses or use of multiple  
84 drugs are rarely taken into account.[10, 11] Studying the care of multimorbid patients is  
85 crucial to managing the future global challenge of ensuring safe, effective and evidence-  
86 based care to these patients.[1, 11, 12]

87 Multimorbid patients using numerous drugs are at high risk of harm by drug-related  
88 problems (DRPs).[13, 14] DRPs are reported to cause 10-30% of all hospital admissions,  
89 whereof a high proportion is preventable.[15-17] Drugs also cause problems during the  
90 hospital stay[18, 19], which pose a risk of readmissions.[20, 21] A recent Cochrane review  
91 found no evidence that medicines reviews reduce hospital readmissions or mortality.[22]  
92 The authors state that important effects may have been overlooked due to short follow-up  
93 in included studies, and request high-quality studies with long follow-up in high-risk patient  
94 populations.[22]

95 The Integrated Medicines Management (IMM) model has been established as a tool for  
96 clinical pharmacists to optimize and individualize drug therapy.[23] IMM comprises a  
97 systematic approach to ensure high quality of the use of drugs throughout the hospital stay,  
98 comprising a three-step procedure, i.e. medicines reconciliation at admission, medicines

1  
2  
3 99 reviews during the stay and medicines reconciliation and -information at discharge.[23-27]  
4  
5  
6 100 Nevertheless, only a very limited number of clinical pharmacists are working in Norwegian  
7  
8 101 hospitals, hence standard care for hospitalized patients does not include IMM or other  
9  
10 102 services by clinical pharmacists. Several studies have investigated the effect of implementing  
11  
12 103 either parts of, or the complete IMM model on different efficacy measures[23-25, 28], but to  
13  
14 104 our knowledge, not in multimorbid patients. The objective of the present study was to  
15  
16 105 investigate the effect of pharmacist-led medicines management in multimorbid, hospitalized  
17  
18 106 patients on long-term hospital readmissions and survival.  
19  
20  
21  
22

## 23 107 **MATERIALS AND METHODS**

### 24 25 26 108 **Study Design**

27  
28  
29  
30 109 This parallel-group, randomized controlled trial, approved by the Regional Committee for  
31  
32 110 Medical and Health Research Ethics (2014/704/REK south-eastern D) and the Privacy  
33  
34 111 Ombudsman, was conducted at the internal medicine ward, Oslo University hospital  
35  
36 112 (Ullevaal), Norway. The ward comprised 24 beds and mainly received patients with multiple  
37  
38 113 medical issues, in particular hematological, endocrine, infectious and/or cardiovascular.  
39  
40 114 Patients were considered for inclusion Monday to Friday during regular daytime working  
41  
42 115 hours, from August 30, 2014, until the predetermined target number of 400 patients was  
43  
44 116 enrolled. Eligible patients were prospectively invited and enrolled in the study following  
45  
46 117 written informed consent. S1 Appendix shows the original trial protocol, protocol  
47  
48 118 amendments, the statistical analysis plan and the timeline of the study with the milestones.  
49  
50 119 S2 Appendix shows the CONSORT Checklist. Figure 1 gives a graphical depiction of the study  
51  
52 120 design, as suggested for studies of complex interventions.[29]  
53  
54  
55  
56  
57  
58  
59  
60



1  
2  
3 121 The trial was registered in ClinicalTrials.gov, identifier: NCT02336113, in June 2014. Due to a  
4  
5 122 minor Protocol Registration and Results System (PRS) review comment, the trial was first  
6  
7  
8 123 published on their website in January 2015. A clarification that readmission data were to be  
9  
10 124 harvested from the Norwegian Patient Registry, was the only addition to the original  
11  
12  
13 125 registration. The trial is closed for new participants.  
14  
15

## 16 126 **Participants**

17  
18  
19 127 Inclusion criteria were: acute admission, age  $\geq 18$  years and use of at least four regular drugs  
20  
21 128 from minimum two therapy classes (Anatomical Therapeutic Chemical (ATC)[30] at 1st level)  
22  
23  
24 129 at admission. The latter was chosen as the preferred multimorbidity measure[31], as drug  
25  
26 130 counts were considered more reliable than disease counts in the acute hospital admission  
27  
28  
29 131 setting. Drugs were counted before medicines reconciliation. However, if the medicines  
30  
31 132 reconciliation revealed that this inclusion criterion was not fulfilled, the patient was  
32  
33  
34 133 excluded from the study. Exclusion criteria were i) terminally ill, ii) isolated due to severe  
35  
36 134 infections or iii) unable to communicate in Norwegian or English and no translator available.  
37  
38  
39 135 Patients readmitted during the study period were not invited for 'a second' inclusion.  
40

## 41 136 **Randomization and blinding**

42  
43  
44  
45 137 The patients were randomized 1:1 to the intervention or control group. Centre for  
46  
47 138 Biostatistics and Epidemiology, Oslo University Hospital, was responsible for the  
48  
49  
50 139 randomization procedure. Their staff had no contact with patients, study pharmacists or  
51  
52 140 ward staff. A random number generator program and a permuted block design were used to  
53  
54  
55 141 generate the randomization sequence, which was delivered to the study pharmacists in  
56  
57 142 sequentially numbered, opaque, sealed envelopes. The investigators were blinded to block  
58  
59 143 size, which was randomly varied. Randomization took place following patient inclusion and  
60

1  
2  
3 144 baseline assessments. A study pharmacist assigned the envelope with the lowest number to  
4  
5  
6 145 the individual participant and signed the allocation before the envelope was opened.  
7

8  
9 146 It was neither feasible to blind participants nor study pharmacists to the allocation. It was  
10  
11 147 also known by ward staff which of the patients belonged to the intervention group. Ward  
12  
13 148 staff was, however, unable to distinguish between patients randomized to the control group  
14  
15  
16 149 and patients not participating in the trial. The primary endpoint analysis was conducted on a  
17  
18 150 blinded dataset (by researchers who did not see patients). The staff from the Norwegian  
19  
20  
21 151 Patient Registry and the Norwegian Cause of Death Registry providing outcome data were  
22  
23 152 not involved in data collection or preparation of data files and were blinded to group  
24  
25  
26 153 allocation.  
27

#### 28 29 154 **Data collection and baseline assessments**

30  
31  
32 155 During the inclusion period, six clinical pharmacists, all with a master`s degree in clinical  
33  
34 156 pharmacy and standardized training in IMM, collected data, conducted baseline assessments  
35  
36  
37 157 and provided the various steps of the intervention. All steps were standardized using  
38  
39 158 translated IMM procedures adapted to the Norwegian hospital setting.[23-27, 32] A DRP was  
40  
41  
42 159 defined according to the Pharmaceutical Care Network Europe (PCNE) as *“an event or*  
43  
44 160 *circumstance involving drug therapy that actually or potentially interferes with desired*  
45  
46 161 *health outcomes”*.[33]  
47

48  
49  
50 162 Blood samples were collected for biochemical analyses. Glomerular filtration rate (GFR) was  
51  
52 163 calculated using the Cockcroft-Gault formula[34], except for obese patients (body-mass  
53  
54 164 index > 30), for whom the Salazar-Corcoran formula was used.[35] An experienced senior  
55  
56  
57 165 physician retrospectively collected information from medical records to calculate the  
58  
59 166 Charlson Comorbidity Index (CCI) score.[36]  
60

1  
2  
3 167 Before allocation, baseline assessments were conducted for all included patients, comprising  
4  
5 168 medicines reconciliation and review. The purpose of these baseline assessments was to  
6  
7 169 assess the prevalence of DRPs and drug-related hospitalizations [37]. These medicines  
8  
9 170 reviews included only drugs used before admission, not drugs initiated during transport, or  
10  
11 171 following hospital admission. The pharmacists had access to the patient's medical history  
12  
13 172 and laboratory results up to and including admission time. Importantly though, medicines  
14  
15 173 discrepancies, i.e. mismatches between the reconciled drug list and the list recorded at  
16  
17 174 hospital admission, and DRPs revealed during these baseline assessments were *not*  
18  
19 175 discussed in the multidisciplinary treatment team. Before allocation, the study pharmacist  
20  
21 176 assessed whether any medicines discrepancy or DRP could result in irreversible detrimental  
22  
23 177 effects or death if not handled immediately. If the patient was allocated to the control  
24  
25 178 group, any such issue was discussed with a senior physician (MM) who decided whether it  
26  
27 179 was necessary to intervene.  
28  
29  
30  
31  
32  
33  
34

### 35 180 **The intervention group – in-hospital pharmacist-led medicines management**

36  
37  
38 181 The thorough intervention implied the inclusion of clinical pharmacist(s) in the patients`  
39  
40 182 multidisciplinary treatment team throughout the hospital stay, working in close  
41  
42 183 collaboration with the patient, physicians and other members of the team, as shown in  
43  
44 184 Figure 1. The medicines management process can be divided into three parts covering the  
45  
46 185 patients` hospital stay; medicines reconciliation at admission, medicines review repeatedly  
47  
48 186 during the entire stay and medicines reconciliation and tailored information at  
49  
50 187 discharge.[23-27] Medicines reviews were performed at admission and repeatedly as  
51  
52 188 needed due to changes in either prescription, patient symptoms, clinical state, and/or  
53  
54  
55  
56  
57  
58  
59  
60

1  
2  
3 189 laboratory values. Patients were reviewed for such changes daily, Monday to Friday, during  
4  
5  
6 190 regular daytime working hours.  
7  
8 191 During medicines reviews, a list of pre-defined risk categories, all described in detail in Table  
9  
10 192 1, were systematically addressed for each drug in each patient. Furthermore, an overall  
11  
12  
13 193 benefit-risk assessment was made with the main goal of tailoring drug therapy to the  
14  
15 194 individual participant, giving significant weight to the patient perspective. Medicines  
16  
17  
18 195 discrepancies and DRPs revealed during both baseline assessments and the hospital stay  
19  
20 196 were discussed in the multidisciplinary treatment team. At discharge, a medicines  
21  
22  
23 197 reconciliation was conducted, followed by written and oral information tailored to the  
24  
25 198 patient's further needs of care, provided to the patient and/or next care provider, see Figure  
26  
27  
28 199 1. The main goals of this step were to answer drug questions, to ensure continuous  
29  
30 200 treatment, to increase adherence, and to provide the patient and/or next care provider a  
31  
32 201 complete overview of all drugs.  
33  
34  
35  
36  
37  
38  
39  
40  
41  
42  
43  
44  
45  
46  
47  
48  
49  
50  
51  
52  
53  
54  
55  
56  
57  
58  
59  
60

**Table 1.** Detailed description of the risk categories that were systematically addressed for each drug in each patient during the medicines reviews, and examples of sources used by clinical pharmacists to address them.

| Risk category                             | Detailed description                                                                                                              | Examples of sources                                                                                                                                                                                                                                                                                                                                                                                                                                                       |
|-------------------------------------------|-----------------------------------------------------------------------------------------------------------------------------------|---------------------------------------------------------------------------------------------------------------------------------------------------------------------------------------------------------------------------------------------------------------------------------------------------------------------------------------------------------------------------------------------------------------------------------------------------------------------------|
| Drug monitoring                           | Need for therapeutic drug monitoring or laboratory monitoring, e.g. digoxin, warfarin, antiepileptics                             | <ul style="list-style-type: none"> <li>The Pharmacology Portal – Norwegian portal for drug and intoxicant analyses - <a href="http://www.farmakologiportalen.no/">http://www.farmakologiportalen.no/</a></li> <li>Norwegian National Centre for Epilepsy</li> <li>Centre for Psychopharmacology, Diakonhjemmet Hospital, Norway</li> </ul>                                                                                                                                |
| Adverse effect                            | Presence of symptoms or changes in laboratory values possibly caused by drug(s)                                                   | <ul style="list-style-type: none"> <li>Summary of Product Characteristics (SPC)</li> <li>UpToDate</li> <li>Micromedex</li> <li>CredibleMeds, QTDrugs List, - <a href="https://crediblemeds.org/">https://crediblemeds.org/</a></li> </ul>                                                                                                                                                                                                                                 |
| Drug-drug interaction                     | Clinically relevant drug-drug interactions                                                                                        | <ul style="list-style-type: none"> <li>The Norwegian Medicines Agency – Drug interactions checker</li> <li>Micromedex – Drug interactions</li> <li>Drugs.com – Drug interactions checker</li> </ul>                                                                                                                                                                                                                                                                       |
| Non-optimal drug therapy                  | Lack of drug treatment or non-optimal drug treatment of a symptom/disease                                                         | <ul style="list-style-type: none"> <li>Therapy guidelines</li> <li>BMJ Best Practice</li> <li>UpToDate</li> <li>Summary of Product Characteristics (SPC)</li> </ul>                                                                                                                                                                                                                                                                                                       |
| Reduced organ function / contraindication | Drug or dosage of drug inappropriate due to reduced kidney function, reduced liver function, contraindications or other diseases. | <ul style="list-style-type: none"> <li>The Renal Drug Handbook - <a href="https://renaldrugdatabase.com/">https://renaldrugdatabase.com/</a></li> <li>UpToDate</li> <li>Micromedex</li> <li>Internetmedicin <a href="https://www.internetmedicin.se/searchresult.aspx?search=lever">https://www.internetmedicin.se/searchresult.aspx?search=lever</a> (reduced liver function/drugs that can harm the liver)</li> <li>Summary of Product Characteristics (SPC)</li> </ul> |
| Inappropriate drug in elderly             | Use of less favourable drug in patients over 65 years old, e.g. anticholinergics                                                  | <ul style="list-style-type: none"> <li>STOPP 2 (Screening Tool of Older Persons' Prescriptions)</li> <li>Beers criteria</li> </ul>                                                                                                                                                                                                                                                                                                                                        |
| Unnecessary drug                          | Drug in use is not indicated                                                                                                      | <ul style="list-style-type: none"> <li>Therapy guidelines</li> <li>Summary of Product Characteristics (SPC)</li> <li>UpToDate</li> </ul>                                                                                                                                                                                                                                                                                                                                  |
| Course length                             | Consideration of appropriate duration of course length, e.g. duration of antibiotics                                              | <ul style="list-style-type: none"> <li>Summary of Product Characteristics (SPC)</li> <li>The Norwegian Directorate of Health – National guideline for the use of antibiotics in hospitals</li> <li>The European Committee on Antimicrobial Susceptibility Testing - EUCAST - minimum inhibitory concentrations</li> </ul>                                                                                                                                                 |
| Practical problem                         | Practical challenges in drug handling, e.g. inhalation devices                                                                    | <ul style="list-style-type: none"> <li>Summary of Product Characteristics (SPC)</li> <li>Local procedure for tablets and capsules - dividing, opening and crushing</li> <li>Handbook of Drug Administration via Enteral Feeding Tubes - <a href="https://about.medicinescomplete.com/publication/drug-administration-via-enteral-feeding-tubes/">https://about.medicinescomplete.com/publication/drug-administration-via-enteral-feeding-tubes/</a></li> </ul>            |
| Adherence issue                           | Patient does not, intentionally or unintentionally, use / take drug as agreed                                                     | <ul style="list-style-type: none"> <li>Quick guide inhalators - <a href="https://sykehusapoteket.no/Documents/Inhalasjonsmedisin%20for%200sykehusleger.pdf">https://sykehusapoteket.no/Documents/Inhalasjonsmedisin%20for%200sykehusleger.pdf</a></li> <li>Videos – use of inhalators - <a href="https://www.felleskatalogen.no/medisin/bruk-av-inhalatorer/aerochamber">https://www.felleskatalogen.no/medisin/bruk-av-inhalatorer/aerochamber</a></li> </ul>            |
| Other                                     | Problem not applicable in other subgroups, e.g. prescription errors, documentation errors                                         | <ul style="list-style-type: none"> <li>The patient's medical record</li> </ul>                                                                                                                                                                                                                                                                                                                                                                                            |

205

1  
2  
3 206 **The control group - standard care**  
4  
5

6 207 The control group received standard care, see Figure 1, which in line with standard  
7  
8 208 procedures in Norwegian hospitals included neither medicines reconciliation nor medicines  
9  
10 209 reviews or any other service from clinical pharmacists. Medicines discrepancies and DRPs  
11  
12 210 revealed during baseline assessments in control patients were only registered in the  
13  
14 211 research database, and not discussed in the multidisciplinary treatment team.  
15  
16  
17  
18

19 212 **Endpoints**  
20

21 213 The primary endpoint was time to first hospital readmission or death within 12 months after  
22  
23 214 discharge.  
24  
25

26 215 Secondary endpoints:  
27  
28

- 29  
30 216 • Overall survival  
31  
32 217 • Number of unplanned hospitalizations per patient within 12 months after  
33  
34 218 discharge  
35  
36  
37 219 • Proportion of patients:  
38  
39 220 ○ with unplanned hospitalizations within 30 days, 6 months and 12 months  
40  
41 221 after discharge  
42  
43 222 ○ who died within 30 days, 6 months, 12 months and 20 months after  
44  
45 223 discharge  
46  
47 224 ○ who died or had unplanned hospitalizations within 30 days, 6 months and  
48  
49 225 12 months after discharge  
50  
51  
52  
53 226 • Length of stay (LOS) of first hospital readmission  
54  
55 227 • Time to the first unplanned readmission within 12 months after discharge,  
56  
57 228 censored for deaths  
58  
59  
60

1  
2  
3 229 In the original trial protocol, included in S1 Appendix, the *difference between the control and*  
4  
5 230 *intervention group in time to the first readmission* was defined as the primary endpoint  
6  
7  
8 231 without further specification. As death is a competing risk to readmissions, it was considered  
9  
10 232 appropriate to use the *difference in time to readmission or death* as the primary endpoint.  
11  
12  
13 233 This was clarified in the statistical analysis plan, which was finalized and signed before  
14  
15 234 outcome data files were available.

16  
17  
18 235 Data on readmissions were provided by the Norwegian Patient Registry and data on  
19  
20  
21 236 mortality by the Norwegian Cause of Death Registry. We had originally planned a follow-up  
22  
23 237 of 12 months. However, as both the inclusion period and the retrieval of outcome data took  
24  
25  
26 238 longer than planned, we decided to extend the follow-up of all patients to December 31,  
27  
28 239 2017, to increase statistical power. This amendment was described in the statistical analysis  
29  
30 240 plan, which was finalized and signed before any outcome data files were available. Because  
31  
32  
33 241 the inclusion period lasted approximately 1.5 years, the follow up of each individual patient  
34  
35 242 was in the range 21 – 40 months.

36  
37  
38 243 The primary efficacy analysis was a modified intention to treat-analysis excluding patients  
39  
40 244 who died during the index hospital stay as they were never at risk for readmission, as well as  
41  
42  
43 245 erroneously included patients. The analysis population was defined before outcome data  
44  
45  
46 246 files were received.

#### 47 48 49 247 **Sample size**

50  
51  
52 248 The sample size calculation was based on an expected 12-month readmission frequency of  
53  
54 249 50%.[23] It was estimated that to detect a 15% absolute reduction in hospital readmissions  
55  
56  
57 250 with 80% power and a significance level of 5%, we would need 168 patients in each group.  
58  
59 251 To compensate for any dropouts, it was decided to enroll 200 patients in each group. Sample  
60

1  
2  
3 252 size calculations based on proportions are generally considered reliable for survival analysis,  
4  
5  
6 253 but might in some instances overestimate the required sample size.[38] In other words:  
7  
8 254 since a survival analysis utilizes the information better than a comparison of proportions at a  
9  
10 255 given time, the power will be somewhat higher than estimated above.  
11  
12

### 13 256 **Statistics**

14  
15  
16 257 Time-to-event endpoints were compared between groups by the Kaplan Meier method and  
17  
18 258 the log-rank test. Cox's proportional hazards model was applied to estimate hazard ratios  
19  
20 259 (HRs), which are presented with 95% confidence intervals (CIs). The proportionality  
21  
22 260 assumption was checked by visual inspection of log(-log) plots. Continuous variables were  
23  
24 261 compared between the two groups using Mann-Whitney tests. In an additional sensitivity  
25  
26 262 analysis of time to readmission, which was not included in the statistical analysis plan, death  
27  
28 263 was treated as a competing risk using the Fine and Gray method [39].  
29  
30  
31  
32

33  
34 264 Statistical analyses were performed by IBM SPSS Software version 25.0 (IBM Corp. NY) and  
35  
36 265 STATA 16. P values < 0.05 were regarded as statistically significant.  
37  
38  
39

### 40 266 **Patient and Public Involvement**

41  
42  
43 267 During the planning of the study, patient representatives from the medical clinic participated  
44  
45 268 in the preparation of the patient information leaflet and provided input on the study design,  
46  
47 269 e.g. the choice of the primary endpoint.  
48  
49  
50

### 51 270 **RESULTS**

52  
53  
54 271 During the study period, August 30, 2014, to March 17, 2016, 2174 patients were admitted  
55  
56 272 to the internal medicine ward and 1769 (81%) were assessed for eligibility. Figure 2 shows  
57  
58 273 the patient flow. Among the 598 patients invited to participate, 175 (29%) declined  
59  
60



1  
2  
3 274 (permission to register reasons for declining not obtained). 399 patients were randomized,  
4  
5  
6 275 200 to the intervention group and 199 to the control group. Following randomization, 11  
7  
8 276 patients (5 intervention and 6 control) who died during the hospital stay and 2 patients  
9  
10 277 (both intervention) who were erroneously included, were excluded from the analyses. Thus,  
11  
12  
13 278 the analysis population for all endpoints comprised 193 patients in each group, all followed-  
14  
15 279 up until December 31, 2017, i.e. for a minimum of 21 months and a maximum of 40 months.  
16  
17  
18 280 The median age in the analysis population was 79 years (range 23-96), 356 (92%) were  
19  
20  
21 281 home-dwelling before hospitalization and 213 (55%) were women. The median number of  
22  
23 282 regular drugs at hospital admission was 8 (range 4-19). The median number of diseases was  
24  
25  
26 283 7 (range 2-17) and the median CCI score was 3 (range 0-12). The median number of DRPs per  
27  
28 284 patient identified during baseline assessments was 13 (range 3-42). The baseline  
29  
30  
31 285 characteristics of the patients in the control versus the intervention group are presented in  
32  
33 286 Table 2. No differences of importance were observed between the groups.  
34  
35  
36  
37  
38  
39  
40  
41  
42  
43  
44  
45  
46  
47  
48  
49  
50  
51  
52  
53  
54  
55  
56  
57  
58  
59  
60

Table 2. Characteristics of patients in the analysis population.

| Characteristic                                                 | Control<br>(n=193) | Intervention<br>(n=193) |
|----------------------------------------------------------------|--------------------|-------------------------|
| Women                                                          | 106 (55%)          | 102 (53%)               |
| Age                                                            | 80.7 (23.1-96.4)   | 78.0 (25.7-95.6)        |
| Number of unplanned hospitalizations last 6 months             | 1 (0-6)            | 0 (0-11)                |
| Charlson Comorbidity Index score                               | 3 (0-12)           | 2 (0-11)                |
| Most frequent medical history:                                 |                    |                         |
| • Hypertension                                                 | 91 (47%)           | 108 (56%)               |
| • Endocrine and metabolic diseases                             | 77 (40%)           | 80 (42%)                |
| • Kidney disease                                               | 63 (33%)           | 73 (38%)                |
| • Congestive heart failure                                     | 81 (42%)           | 68 (35%)                |
| • Arrhythmia                                                   | 72 (37%)           | 71 (37%)                |
| Body-mass index <sup>a</sup>                                   | 24.4 (14.4-48.4)   | 25.0 (13.1-43.3)        |
| Laboratory results:                                            |                    |                         |
| • Glomerular filtration rate (ml/min)                          | 49 (8-235)         | 52 (9-229)              |
| • Serum-albumin (g/L) <sup>b</sup>                             | 38 (24-51)         | 38 (22-56)              |
| • C-reactive protein (nmol/L)                                  | 133 (0-3419)       | 152 (0-5248)            |
| Number of prescribed drugs <sup>c</sup> at hospital admission: |                    |                         |
| • Regular                                                      | 8 (4-19)           | 8 (4-19)                |
| • On demand                                                    | 2 (0-10)           | 2 (0-11)                |
| Assistance with drug administration before hospitalization:    |                    |                         |
| • Multidose                                                    | 51 (26%)           | 46 (24%)                |
| • Home nurse                                                   | 33 (17%)           | 28 (15%)                |
| • Nursing home                                                 | 15 (8%)            | 15 (8%)                 |
| • Relative                                                     | 13 (7%)            | 14 (7%)                 |
| Home-dwelling before hospitalization                           | 178 (92%)          | 178 (92%)               |
| Number of drug-related problems                                | 13 (3-31)          | 13 (3-42)               |
| Length of index hospital stay, number of days                  | 8 (2-57)           | 7 (1-66)                |
| Total number of prescribed drugs at hospital discharge         | 11 (3-24)          | 11 (3-23)               |
| Discharged to home                                             | 124 (64%)          | 129 (67%)               |
| Assistance with drug administration after discharge:           |                    |                         |
| • Multidose                                                    | 28 (15%)           | 26 (14%)                |
| • Home nurse                                                   | 32 (17%)           | 21 (11%)                |
| • Nursing home                                                 | 51 (26%)           | 51 (26%)                |
| • Relative                                                     | 7 (4%)             | 11 (6%)                 |
| • Other institution/hospital ward                              | 18 (9%)            | 13 (7%)                 |

Data are n (%) or median (range).

<sup>a</sup> Body-mass index was registered for 144/193 control patients and 148/193 intervention patients.

<sup>b</sup> Serum-albumin was registered for 181/193 control patients and 187/193 intervention patients.

<sup>c</sup> After medicines reconciliation

1  
2  
3 288 In the group receiving pharmacist-led medicines management, a total of 3826 DRPs were  
4  
5 289 revealed at hospital admission and during the hospital stay. Type of DRPs revealed and  
6  
7  
8 290 presented for discussion in the multidisciplinary team and the respective acceptance rates  
9  
10 291 will be presented in a separate publication. In overall numbers, 1100 of the 3826 identified  
11  
12 292 DRPs (29 %) were solved without the need for discussion in the multidisciplinary treatment  
13  
14  
15 293 team, while 1075 (28%) were not prioritized for discussion, i.e. considered of low  
16  
17  
18 294 importance compared to other DRPs or the patients` clinical state. The remaining 1651 (43  
19  
20 295 %) DRPs were discussed in the multidisciplinary team, whereof 1022 (62 %) led to immediate  
21  
22 296 changes in the individual patient`s drug treatment. In 6 of the 193 control patients (1.5 %)  
23  
24  
25 297 severe medicines discrepancies or DRPs that had to be intervened on were revealed during  
26  
27  
28 298 baseline assessments.

29  
30 299 Figure 3a shows time to first readmission or death in the two groups. The median time to  
31  
32 300 readmission or death was 184 days in the intervention group and 116 days in the control  
33  
34 301 group, but the difference was not statistically significant (HR 0.82, 95% CI 0.64 to 1.04,  
35  
36 302  $p=0.106$ ). Sensitivity analyses, extending follow-up until December 31, 2017, or excluding  
37  
38 303 control patients who were intervened on, did not influence the effect estimate (HR 0.84,  
39  
40 304 95% CI 0.68 to 1.05,  $p=0.118$  and HR 0.85, 95% CI 0.68 to 1.06,  $p=0.149$ , respectively). The  
41  
42 305 secondary endpoint analysis of time to first readmission, censoring for 20 deaths, gave a  
43  
44 306 similar effect estimate (HR 0.81, 95% CI 0.63-1.04,  $p=0.104$ ), shown in S3 Appendix. When  
45  
46 307 death was instead treated as a competing risk the subdistribution hazard ratio was SHR 0.83,  
47  
48 308 95%CI 0.64-1.06,  $p=0.137$ .

49  
50  
51  
52  
53  
54  
55 309 There was a statistically significant difference in overall survival (HR 0.66, 95% CI 0.48 to  
56  
57 310 0.90,  $p=0.008$ ), as shown in Figure 3b. The results of other the secondary endpoint analyses  
58  
59  
60

311 are shown in Table 3. Within 20 months after the index discharge, 27% of the intervention  
 312 patients had died versus 39% of the control patients.

313 Table 3. Secondary endpoint analyses.

| Endpoint                                                                                          | Intervention group (n=193) | Control group (n=193) | p value |
|---------------------------------------------------------------------------------------------------|----------------------------|-----------------------|---------|
| Number of unplanned hospitalizations per patient within 12 months after discharge, median (range) | 1 (0-13)                   | 1 (0-12)              | 0.212   |
| Length of hospital stay of first unplanned hospitalization, median number of days (range)         | 6 (1-58)                   | 6 (1-71)              | 0.576   |
| Number of patients unplanned hospitalized within                                                  |                            |                       |         |
| • 30 days after index discharge, n (%)                                                            | 37 (19)                    | 46 (24)               | 0.265   |
| • 6 months after index discharge, n (%)                                                           | 89 (46)                    | 103 (53)              | 0.154   |
| • 12 months after index discharge, n (%)                                                          | 115 (60)                   | 129 (67)              | 0.139   |
| Number of patients who died within                                                                |                            |                       |         |
| • 30 days after index discharge, n (%)                                                            | 4 (2)                      | 7 (4)                 | 0.359   |
| • 6 months after index discharge, n (%)                                                           | 24 (12)                    | 36 (19)               | 0.092   |
| • 12 months after index discharge, n (%)                                                          | 44 (23)                    | 56 (29)               | 0.163   |
| • 20 months after index discharge, n (%)                                                          | 52 (27)                    | 76 (39)               | 0.009   |
| Number of patients who died or was unplanned hospitalized within                                  |                            |                       |         |
| • 30 days after index discharge, n (%)                                                            | 41 (21)                    | 51 (26)               | 0.232   |
| • 6 months after index discharge, n (%)                                                           | 96 (50)                    | 113 (59)              | 0.082   |
| • 12 months after index discharge, n (%)                                                          | 125 (65)                   | 139 (72)              | 0.125   |

314

## 315 DISCUSSION

316 Pharmacist-led medicines management in multimorbid patients did not statistically  
 317 significantly prolong the time until first readmission or death compared to control patients.  
 318 The result is in contrast with previous randomized controlled trials (RCTs) on similar  
 319 interventions provided to other patient populations, showing a decreased readmission rate,  
 320 prolonged time to readmission, and a reduction in hospital visits.[23, 40-42] This contrast  
 321 may be explained by the patient population. To our knowledge, our study is the first to  
 322 investigate the effect of a medicines management intervention on clinically relevant  
 323 endpoints in multimorbid patients with complex drug regimens. In this population, urgent

1  
2  
3 324 medical care like hospital readmissions might be difficult to avoid. This theory is supported  
4  
5  
6 325 by a subgroup analysis of one of the previous RCTs, which found that in patients 80 years or  
7  
8 326 older a pharmacist intervention was more effective in preventing emergency department  
9  
10 327 visits in patients using less than 5 drugs compared to patients using 5 drugs or more.[28]  
11  
12  
13 328 However, it should be noted that the 95% confidence interval in our study is wide and  
14  
15 329 compatible with a risk reduction of 36% as well as a 4% increased risk. The sample size  
16  
17  
18 330 calculation in the current study was based on a target 15% reduction in readmissions, which  
19  
20 331 may have been optimistic, and insufficient power may therefore explain the non-significant  
21  
22  
23 332 result.

24  
25  
26 333 A statistically significantly increased overall survival, one of the secondary endpoints, was  
27  
28 334 seen in patients in the intervention versus the control group. The hazard reduction of 34% is  
29  
30  
31 335 indisputably clinically relevant and reflects a great improvement potential in the care of  
32  
33 336 multimorbid patients. To our knowledge, this is the first study to show an effect of  
34  
35  
36 337 pharmacist-led medicines management on survival. This endpoint was either not  
37  
38 338 investigated[23, 42], or no effect was seen[40, 41] in the previous RCTs. The results of our  
39  
40  
41 339 study are in contrast to the recent Cochrane review concluding that “medication review  
42  
43 340 does not seem to prevent death and hospital readmissions”. [22] The reason for this  
44  
45 341 discrepancy is most likely multifactorial and due to differences in patient populations,  
46  
47  
48 342 characteristics of the interventions, and the duration of the follow-up. Important differences  
49  
50 343 in the patient populations include older patients in the study by Gillespie et al.[40], and that  
51  
52 344 the study by Ravn-Nielsen et al.[43] included patients with lower mortality than the current  
53  
54  
55 345 study, i.e. mortality rates of 10% versus 19%, respectively, in the control group at 6 months  
56  
57  
58 346 after index discharge. In our study, a thorough intervention conducted close to the patient,  
59  
60 347 including medicines reconciliation both at admission and discharge as well as improved

1  
2  
3 348 information at discharge to ensure continuous treatment and increase adherence, may  
4  
5  
6 349 constitute characteristics of the intervention important for the effect on survival. Clinical  
7  
8 350 pharmacists performing the procedures of the intervention in close collaboration with the  
9  
10 351 patient, physician and other members of the treatment team are most likely also important  
11  
12  
13 352 for obtaining the effect on survival. At last, the longer follow-up in the present study,  
14  
15 353 prolonged by several months compared to the other RCTs[40, 43], could have allowed  
16  
17 354 prophylactic drugs added during medicine reviews enough time to achieve beneficial  
18  
19  
20 355 effects[22] and probably contributes to explain the intervention`s effect on survival.  
21  
22  
23 356 Heterogeneity in the pharmacist-led in-hospital interventions, including various elements of  
24  
25  
26 357 various intensity, make comparisons of results amongst studies, as well as interpretation of  
27  
28 358 results, challenging.[22, 44] Furthermore, such interventions are indisputably complex, and  
29  
30  
31 359 evaluating such interventions is complicated.[45, 46] The intervention consists of various  
32  
33 360 components delivered as an overall intervention. With such a design, it is not known  
34  
35  
36 361 whether the overall intervention or only parts of it are important for effect. The intervention  
37  
38 362 in the current study consisted of elements of the highest level of intensity, i.e. diamond level  
39  
40  
41 363 medicines reconciliation[44, 47] and advanced medicines reviews.[48] In the recent RCT  
42  
43 364 from Denmark, a similar intervention of similar intensity reduced emergency department  
44  
45 365 visits and hospital readmissions but did not have an effect on mortality[43], i.e. the opposite  
46  
47  
48 366 of our results. Differences in eligibility criteria, nuances in the delivered intervention and/or  
49  
50 367 care delivered to control patients, clinical pharmacists` training and how they interacted  
51  
52  
53 368 with the rest of the multidisciplinary treatment team may be factors contributing to explain  
54  
55 369 this. The current study nevertheless adds to the international body of literature that high-  
56  
57  
58 370 intensity, in-hospital pharmacist-led interventions to tailor drug therapy may improve clinical  
59  
60 371 outcomes in high-risk patients.

1  
2  
3 372 The intervention had no effect on the length of stay (LOS) of the first readmission. This was  
4  
5  
6 373 not surprising, as hospitals in Norway for several years have received incentives to reduce  
7  
8 374 LOS, illustrated by as short as 6 days median LOS of the first readmission in the present  
9  
10 375 study. In comparison, an IMM-intervention showed a reduction from 13.1 days to 9.7 days  
11  
12 376 LOS of the first readmission in Northern Ireland.[23] The number of unplanned  
13  
14  
15 377 hospitalizations during 12 months follow-up did not differ between the groups in the present  
16  
17 378 study, in line with findings by Gillespie et al.[40]  
18  
19  
20  
21 379 Drug counts were chosen as the preferred multimorbidity measure at patient inclusion,  
22  
23 380 which could be seen as a limitation. Nonetheless, this strategy resulted in the inclusion of a  
24  
25 381 multimorbid patient population, as validated by diseases counts according to the generally  
26  
27 382 accepted definition.[3] Our study included patients from a single hospital in Norway which  
28  
29 383 may challenge the generalizability. However, the study had few exclusion criteria, thus  
30  
31 384 comprising a broad population. The low drop-out rate further contributes favourably to  
32  
33 385 external validity.  
34  
35  
36  
37  
38 386 It was not feasible to blind participants, study pharmacists or ward physicians to group  
39  
40 387 allocation. To limit bias, the study was blinded on all steps considered possible to blind. Any  
41  
42 388 spill-over effect of the intervention to control patients would, in any case, reduce the effect  
43  
44 389 estimate. Due to the complexity of the intervention a proportion of the intervention patients  
45  
46 390 did not receive the complete intervention, which may also have contributed to the non-  
47  
48 391 significance on the primary endpoint and an underestimation of the effect on survival. The  
49  
50 392 broad inclusion criteria may have resulted in the inclusion of participants at low risk of  
51  
52 393 readmission and death, which might also have contributed to the non-significant result on  
53  
54 394 the primary endpoint, as well as buffered the effect of the intervention on survival. Studying  
55  
56  
57  
58  
59  
60

1  
2  
3 395 the effect of pharmacist-led medicines management in a subgroup of multimorbid patients  
4  
5 396 at the highest risk of readmission, e.g. by stratifying on frailty, could be useful. The  
6  
7  
8 397 randomized controlled design and the long follow-up of all patients are factors that  
9  
10 398 strengthen the study.

## 13 399 **CONCLUSION**

14  
15  
16  
17 400 Pharmacist-led medicines management in-hospital to multimorbid patients had no  
18  
19 401 statistically significant effect on time until readmission or death. A statistically significant  
20  
21  
22 402 increase in overall survival was seen. As a response to the increasing challenges of providing  
23  
24 403 safe and evidence-based healthcare to high-risk multimorbid patients, further studies should  
25  
26  
27 404 be conducted to investigate the effect of such an intervention on a larger scale.

28  
29  
30 405

31  
32  
33 406

## 34 35 36 407 **Competing interests statement**

37  
38  
39 408 Author ML received Ph.D. funding from the South-Eastern Norway Regional Health Authority  
40  
41 409 (grant number 12/00718). The other authors declare that they have no competing interests.

## 42 43 44 410 **Acknowledgments**

45  
46  
47 411 The authors thank the study pharmacists Anne Schwinghammer, Anette Engnes, Elin  
48  
49 412 Trapnes, Hanne Steen and Petra Foyndland for their valuable contribution in patient inclusion,  
50  
51 413 medicines reconciliation and review, senior physician Jo Fuglestved for summarizing the CCI  
52  
53 414 scores, Anne Mette Njaastad, Kristin Hestad Solheim, Kristin Thomassen and Torhild  
54  
55  
56  
57 415 Heggstad for valuable input on the study design, employees at the internal medicine ward  
58  
59  
60



1  
2  
3 416 for the positive attitude to the study, and finally Dominic Anthony Hoff for valuable support  
4  
5  
6 417 regarding data punching.  
7

#### 8 9 418 **Data sharing statement**

10  
11  
12 419 The data that support the findings of this study are available from Oslo University Hospital  
13  
14 420 but restrictions apply to the availability of these data, which were used under license for the  
15  
16 421 current study, and so are not publicly available. Deidentified participant data are however  
17  
18 422 available from the authors upon reasonable request and with permission of Oslo University  
19  
20 423 Hospital, with publication. Additional related documents, e.g. patient consent forms, are  
21  
22 424 available at request.  
23  
24  
25

#### 26 27 425 **Funding**

28  
29  
30 426 This work was supported by South-Eastern Norway Regional Health Authority (Ph.D. grant  
31  
32 427 number 12/00718 to author ML). Additional support was provided by the Hospital  
33  
34 428 Pharmacies Enterprise and Oslo University Hospital and Diakonhjemmet hospital. The  
35  
36 429 funders had no role in study design, data collection and analysis, decision to publish, or  
37  
38 430 preparation of the manuscript.  
39  
40  
41  
42

#### 43 431 **Author contributions**

44  
45  
46 432 **Marianne Lea:** Conceptualization, Formal analysis, Funding acquisition, Investigation,  
47  
48 433 Methodology, Project administration, Software, Writing – original draft, Writing – review &  
49  
50 434 editing  
51  
52  
53

54 435 **Morten Mowe:** Conceptualization, Funding acquisition, Methodology, Project  
55  
56 436 administration, Supervision, Writing – review & editing  
57  
58  
59  
60

- 1  
2  
3 437 **Espen Molden:** Conceptualization, Funding acquisition, Methodology, Supervision, Writing –  
4  
5  
6 438 review & editing  
7  
8  
9 439 **Kristin Kvernørød:** Investigation, Methodology, Resources, Writing – review & editing  
10  
11  
12 440 **Eva Skovlund:** Conceptualization, Formal analysis, Funding acquisition, Methodology,  
13  
14 441 Writing – review & editing  
15  
16  
17 442 **Liv Mathiesen:** Conceptualization, Formal analysis, Funding acquisition, Methodology,  
18  
19 443 Project administration, Supervision, Writing – original draft, Writing – review & editing  
20  
21  
22 444 **Disclaimer:** Data from the Norwegian Patient Registry has been used in this publication. The  
23  
24 445 interpretation and reporting of these data are the sole responsibility of the authors, and no  
25  
26 446 endorsement by the Norwegian Patient Registry is intended nor should be inferred.  
27  
28  
29  
30  
31  
32  
33  
34  
35  
36  
37  
38  
39  
40  
41  
42  
43  
44  
45  
46  
47  
48  
49  
50  
51  
52  
53  
54  
55  
56  
57  
58  
59  
60

## REFERENCES

1. Uijen AA, van de Lisdonk EH. Multimorbidity in primary care: prevalence and trend over the last 20 years. *The European journal of general practice*. 2008;14 Suppl 1:28-32.
2. Jureviciene E, Onder G, Visockiene Z, Puronaite R, Petrikonyte D, Gargalskaite U, et al. Does multimorbidity still remain a matter of the elderly: Lithuanian national data analysis. *Health policy (Amsterdam, Netherlands)*. 2018;122(6):681-6.
3. Mercer S, Salisbury C, Fortin M. ABC of Multimorbidity. First ed: John Wiley & Sons; 2014.
4. Marengoni A, Angleman S, Melis R, Mangialasche F, Karp A, Garmen A, et al. Aging with multimorbidity: a systematic review of the literature. *Ageing research reviews*. 2011;10(4):430-9.
5. Roberts KC, Rao DP, Bennett TL, Loukine L, Jayaraman GC. Prevalence and patterns of chronic disease multimorbidity and associated determinants in Canada. *Health promotion and chronic disease prevention in Canada : research, policy and practice*. 2015;35(6):87-94.
6. Brett T, Arnold-Reed DE, Popescu A, Soliman B, Bulsara MK, Fine H, et al. Multimorbidity in patients attending 2 Australian primary care practices. *Annals of family medicine*. 2013;11(6):535-42.
7. Nobili A, Marengoni A, Tettamanti M, Salerno F, Pasina L, Franchi C, et al. Association between clusters of diseases and polypharmacy in hospitalized elderly patients: results from the REPOSI study. *European journal of internal medicine*. 2011;22(6):597-602.
8. DuGoff EH, Canudas-Romo V, Buttorff C, Leff B, Anderson GF. Multiple chronic conditions and life expectancy: a life table analysis. *Medical care*. 2014;52(8):688-94.
9. Lehnert T, Heider D, Leicht H, Heinrich S, Corrieri S, Lupp M, et al. Review: health care utilization and costs of elderly persons with multiple chronic conditions. *Medical care research and review : MCRR*. 2011;68(4):387-420.
10. Boyd CM, Darer J, Boult C, Fried LP, Boult L, Wu AW. Clinical practice guidelines and quality of care for older patients with multiple comorbid diseases: implications for pay for performance. *Jama*. 2005;294(6):716-24.
11. Tinetti ME, Fried TR, Boyd CM. Designing health care for the most common chronic condition--multimorbidity. *Jama*. 2012;307(23):2493-4.
12. Barnett K, Mercer SW, Norbury M, Watt G, Wyke S, Guthrie B. Epidemiology of multimorbidity and implications for health care, research, and medical education: a cross-sectional study. *Lancet (London, England)*. 2012;380(9836):37-43.
13. Koberlein-Neu J, Mennemann H, Hamacher S, Waltering I, Jaehde U, Schaffert C, et al. Interprofessional Medication Management in Patients With Multiple Morbidities. *Deutsches Arzteblatt international*. 2016;113(44):741-8.
14. Fiss T, Meinke-Franze C, van den Berg N, Hoffmann W. Effects of a three party healthcare network on the incidence levels of drug related problems. *International journal of clinical pharmacy*. 2013;35(5):763-71.
15. Al Hamid A, Ghaleb M, Aljadhey H, Aslanpour Z. A systematic review of hospitalization resulting from medicine-related problems in adult patients. *British journal of clinical pharmacology*. 2014;78(2):202-17.
16. Gustafsson M, Sjolander M, Pfister B, Jonsson J, Schneede J, Lovheim H. Drug-related hospital admissions among old people with dementia. *European journal of clinical pharmacology*. 2016;72(9):1143-53.
17. Rafter N, Hickey A, Conroy RM, Condell S, O'Connor P, Vaughan D, et al. The Irish National Adverse Events Study (INAES): the frequency and nature of adverse events in Irish hospitals-a retrospective record review study. *BMJ quality & safety*. 2017;26(2):111-9.
18. Lea M, Rognan SE, Koristovic R, Wyller TB, Molden E. Severity and management of drug-drug interactions in acute geriatric patients. *Drugs & aging*. 2013;30(9):721-7.
19. Hohmann C, Neumann-Haefelin T, Klotz JM, Freidank A, Radziwill R. Drug-related problems in patients with ischemic stroke in hospital. *International journal of clinical pharmacy*. 2012;34(6):828-31.

- 1  
2  
3 496 20. El Morabet N, Uitvlugt EB, van den Bemt BJB, van den Bemt P, Janssen MJA, Karapinar-Carkit  
4 497 F. Prevalence and Preventability of Drug-Related Hospital Readmissions: A Systematic Review.  
5 498 *Journal of the American Geriatrics Society*. 2018;66(3):602-8.
- 6 499 21. Schwab C, Korb-Savoldelli V, Escudie JB, Fernandez C, Durieux P, Saint-Jean O, et al.  
7 500 Iatrogenic risk factors associated with hospital readmission of elderly patients: A matched case-  
8 501 control study using a clinical data warehouse. *Journal of clinical pharmacy and therapeutics*.  
9 502 2018;43(3):393-400.
- 11 503 22. Christensen M, Lundh A. Medication review in hospitalised patients to reduce morbidity and  
12 504 mortality. *The Cochrane database of systematic reviews*. 2016;2:Cd008986.
- 13 505 23. Scullin C, Scott MG, Hogg A, McElnay JC. An innovative approach to integrated medicines  
14 506 management. *Journal of evaluation in clinical practice*. 2007;13(5):781-8.
- 15 507 24. Midlov P, Holmdahl L, Eriksson T, Bergkvist A, Ljungberg B, Widner H, et al. Medication report  
16 508 reduces number of medication errors when elderly patients are discharged from hospital. *Pharmacy  
17 509 world & science : PWS*. 2008;30(1):92-8.
- 19 510 25. Scullin C, Hogg A, Luo R, Scott MG, McElnay JC. Integrated medicines management - can  
20 511 routine implementation improve quality? *Journal of evaluation in clinical practice*. 2012;18(4):807-  
21 512 15.
- 22 513 26. Midlov P, Deierborg E, Holmdahl L, Hoglund P, Eriksson T. Clinical outcomes from the use of  
23 514 Medication Report when elderly patients are discharged from hospital. *Pharmacy world & science :  
24 515 PWS*. 2008;30(6):840-5.
- 25 516 27. Bergkvist A, Midlov P, Hoglund P, Larsson L, Bondesson A, Eriksson T. Improved quality in the  
26 517 hospital discharge summary reduces medication errors--LIMM: Landskrona Integrated Medicines  
27 518 Management. *European journal of clinical pharmacology*. 2009;65(10):1037-46.
- 29 519 28. Alassaad A, Bertilsson M, Gillespie U, Sundstrom J, Hammarlund-Udenaes M, Melhus H. The  
30 520 effects of pharmacist intervention on emergency department visits in patients 80 years and older:  
31 521 subgroup analyses by number of prescribed drugs and appropriate prescribing. *PloS one*.  
32 522 2014;9(11):e111797.
- 33 523 29. Perera R, Heneghan C, Yudkin P. Graphical method for depicting randomised trials of complex  
34 524 interventions. *BMJ (Clinical research ed)*. 2007;334(7585):127-9.
- 35 525 30. World Health Organization. Collaborating Centre for Drug Statistics Methodology. ATC index  
36 526 with DDDs [cited 2018 September 20]. Available from: [https://www.whocc.no/atc\\_ddd\\_index/](https://www.whocc.no/atc_ddd_index/).
- 37 527 31. Wallace E, McDowell R, Bennett K, Fahey T, Smith SM. Comparison of count-based  
38 528 multimorbidity measures in predicting emergency admission and functional decline in older  
39 529 community-dwelling adults: a prospective cohort study. *BMJ open*. 2016;6(9):e013089.
- 41 530 32. Nilsson N, Lea M, Lao Y, Wendelbo K, Gløersen G, Mowé M, et al. Medication discrepancies  
42 531 revealed by medication reconciliation and their potential short-term and long-term effects: a  
43 532 Norwegian multicentre study carried out on internal medicine wards. *European Journal of Hospital  
44 533 Pharmacy*. 2015;22:298-303.
- 45 534 33. Pharmaceutical Care Network Europe (PCNE). Classification for Drug related problems V 6.2.  
46 535 [cited 2018 April 3]. Available from: [http://www.pcne.org/upload/files/11\\_PCNE\\_classification\\_V6-  
47 536 2.pdf](http://www.pcne.org/upload/files/11_PCNE_classification_V6-2.pdf).
- 49 537 34. Cockcroft DW, Gault MH. Prediction of creatinine clearance from serum creatinine. *Nephron*.  
50 538 1976;16(1):31-41.
- 51 539 35. Salazar DE, Corcoran GB. Predicting creatinine clearance and renal drug clearance in obese  
52 540 patients from estimated fat-free body mass. *The American journal of medicine*. 1988;84(6):1053-60.
- 53 541 36. Charlson ME, Pompei P, Ales KL, MacKenzie CR. A new method of classifying prognostic  
54 542 comorbidity in longitudinal studies: development and validation. *Journal of chronic diseases*.  
55 543 1987;40(5):373-83.
- 57 544 37. Lea M, Mowe M, Mathiesen L, Kvernrod K, Skovlund E, Molden E. Prevalence and risk factors  
58 545 of drug-related hospitalizations in multimorbid patients admitted to an internal medicine ward. *PloS  
59 546 one*. 2019;14(7):e0220071.

- 1  
2  
3 547 38. Gail MH. Applicability of sample size calculations based on a comparison of proportions for  
4 548 use with the logrank test. *Controlled Clinical Trials*. 1985;6(2):112-9.
- 5 549 39. Fine JP, Gray RJ. A Proportional Hazards Model for the Subdistribution of a Competing Risk.  
6 550 *Journal of the American Statistical Association*. 1999;94(446):496-509.
- 7 551 40. Gillespie U, Alassaad A, Henrohn D, Garmo H, Hammarlund-Udenaes M, Toss H, et al. A  
8 552 comprehensive pharmacist intervention to reduce morbidity in patients 80 years or older: a  
9 553 randomized controlled trial. *Archives of internal medicine*. 2009;169(9):894-900.
- 10 554 41. Ravn-Nielsen LV, Duckert ML, Lund ML, Henriksen JP, Nielsen ML, Eriksen CS, et al. Effect of  
11 555 an In-Hospital Multifaceted Clinical Pharmacist Intervention on the Risk of Readmission: A  
12 556 Randomized Clinical Trial. *JAMA internal medicine*. 2018;178(3):375-82.
- 13 557 42. Makowsky MJ, Koshman SL, Midodzi WK, Tsuyuki RT. Capturing outcomes of clinical activities  
14 558 performed by a rounding pharmacist practicing in a team environment: the COLLABORATE study  
15 559 [NCT00351676]. *Medical care*. 2009;47(6):642-50.
- 16 560 43. Ravn-Nielsen LV, Duckert M-L, Lund ML, Henriksen JP, Nielsen ML, Eriksen CS, et al. Effect of  
17 561 an In-Hospital Multifaceted Clinical Pharmacist Intervention on the Risk of Readmission: A  
18 562 Randomized Clinical Trial. *JAMA internal medicine*. 2018;178(3):375-82.
- 19 563 44. Baker M, Bell CM, Xiong W, Etchells E, Rossos PG, Shojanian KG, et al. Do Combined  
20 564 Pharmacist and Prescriber Efforts on Medication Reconciliation Reduce Postdischarge Patient  
21 565 Emergency Department Visits and Hospital Readmissions? *J Hosp Med*. 2018;13(3):152-7.
- 22 566 45. Craig P, Dieppe P, Macintyre S, Michie S, Nazareth I, Petticrew M. Developing and evaluating  
23 567 complex interventions: the new Medical Research Council guidance. *BMJ (Clinical research ed)*.  
24 568 2008;337:a1655.
- 25 569 46. Richards D, Hallberg IR. Complex interventions in health. An overview of research methods.:  
26 570 Routledge; 2015.
- 27 571 47. Fernandes O. Medication reconciliation in the hospital: what, why, where, when, who and  
28 572 how? *Healthc Q*. 2012;15 Spec No:42-9.
- 29 573 48. Griese-Mammen N, Hersberger KE, Messerli M, Leikola S, Horvat N, van Mil JWF, et al. PCNE  
30 574 definition of medication review: reaching agreement. *International journal of clinical pharmacy*.  
31 575 2018;40(5):1199-208.

36  
37  
38  
39 57640  
41 57742  
43 57844  
45 579 **FIGURE LEGENDS**46  
47 **Figure 1.** Title: Graphical depiction of the study design, inspired by Perera and colleagues [29].48  
49 Objects are represented by squares and activities by circles.50  
51  
52 **Figure 2.** Title: Patient flow.53  
54  
55 **Figure 3**56  
57 **a)** Title: Time to first hospital readmission or death in the intervention versus the control group.58  
59 **b)** Title: Overall survival in the intervention versus the control group.  
60

1  
2  
3  
4  
5  
6  
7  
8  
9  
**SUPPLEMENTARY MATERIAL**

10  
11 **S1 Appendix.** Original trial protocol, protocol amendments, statistical analysis plan, statistical  
12 analysis plan amendment and timeline of the study with milestones.

13  
14 **S2 Appendix.** CONSORT Checklist.

15  
16 **S3 Appendix.** Time to first hospital readmission in the intervention versus the control group,  
17 censored for deaths.  
18  
19  
20  
21  
22  
23  
24  
25  
26  
27  
28  
29  
30  
31  
32  
33  
34  
35  
36  
37  
38  
39  
40  
41  
42  
43  
44  
45  
46  
47  
48  
49  
50  
51  
52  
53  
54  
55  
56  
57  
58  
59  
60



|     |                                                                                                                                                                                                                                                                                                                                                                                                                                                                                                                                                                                                                                                                                                                                                                                                                                                                                                                                                                                              |
|-----|----------------------------------------------------------------------------------------------------------------------------------------------------------------------------------------------------------------------------------------------------------------------------------------------------------------------------------------------------------------------------------------------------------------------------------------------------------------------------------------------------------------------------------------------------------------------------------------------------------------------------------------------------------------------------------------------------------------------------------------------------------------------------------------------------------------------------------------------------------------------------------------------------------------------------------------------------------------------------------------------|
| (a) | Medicines reconciliation and review conducted by clinical pharmacist <i>without</i> discussion of medicine discrepancies or drug-related problems (DRPs) and possible solutions in the multidisciplinary team <sup>a</sup>                                                                                                                                                                                                                                                                                                                                                                                                                                                                                                                                                                                                                                                                                                                                                                   |
| [b] | Patient characteristics collected                                                                                                                                                                                                                                                                                                                                                                                                                                                                                                                                                                                                                                                                                                                                                                                                                                                                                                                                                            |
| (c) | Multidisciplinary treatment team <sup>a</sup> discussions of medicine discrepancies and DRPs revealed at hospital admission and possible solutions                                                                                                                                                                                                                                                                                                                                                                                                                                                                                                                                                                                                                                                                                                                                                                                                                                           |
| (d) | Medicines review conducted by clinical pharmacists by systematically addressing 11 pre-defined risk categories for each drug each patient was prescribed at a given point of time; drug monitoring, adverse effect, drug-drug interaction, non-optimal drug therapy, reduced organ function/contraindication, inappropriate drug in elderly, unnecessary drug, course length, practical problem, adherence issue and other. Medicines reviews were performed at admission and repeatedly as needed due to changes in either prescription, patient symptoms, clinical state, and/or laboratory values. Patients were reviewed for such changes daily, Monday to Friday, during regular daytime working hours. Consecutively multidisciplinary treatment team <sup>a</sup> discussions of identified DRPs and possible solutions.                                                                                                                                                              |
| (e) | Standard in-hospital care provided by physicians with internal medicine expertise, nursing staff and when needed; clinical nutrition physiologists and/or physiotherapists                                                                                                                                                                                                                                                                                                                                                                                                                                                                                                                                                                                                                                                                                                                                                                                                                   |
| (f) | Medicines reconciliation, followed by written and verbal information tailored to the patient's further needs of care, as well as discharge activities aiming to ensure continuous treatment and increase adherence: <ul style="list-style-type: none"> <li>• Written systematic information comprising a reconciled drug list with description and justification for all changes made during the hospital stay, to the next care provider<sup>b</sup> (all patients), and to the patient/relative if they to some extent would be involved in handling the drugs after discharge</li> <li>• Verbal information/conversation with the patient and/or relative adapted to the patient needs<sup>c</sup> - if they to some extent would be involved in handling the drugs after discharge</li> <li>• Assistance with retrieving drugs from the pharmacy, if needed</li> <li>• Providing the patient with drugs from the hospital pending on an updated multidose delivery, if needed</li> </ul> |
| (g) | Discharge medicine information (not standardized) provided by physicians with internal medicine expertise and nursing staff                                                                                                                                                                                                                                                                                                                                                                                                                                                                                                                                                                                                                                                                                                                                                                                                                                                                  |
| (h) | Standard care in the primary health care (details not collected)                                                                                                                                                                                                                                                                                                                                                                                                                                                                                                                                                                                                                                                                                                                                                                                                                                                                                                                             |
| [i] | Last day of follow-up on readmissions and mortality outcomes                                                                                                                                                                                                                                                                                                                                                                                                                                                                                                                                                                                                                                                                                                                                                                                                                                                                                                                                 |

<sup>a</sup> The multidisciplinary treatment team consisted of physician with expertise in internal medicine, nursing staff, clinical pharmacist, and when needed; clinical nutrition physiologists and/or physiotherapists

<sup>b</sup> The general practitioner, nursing home, home nurse and/or multidose delivering pharmacy.

<sup>c</sup> Sometimes regarding the entire drug list, sometimes the most important changes, sometimes regarding one specific drug. If the patient was considered to benefit from any provided information or given the opportunity to ask questions, such a targeted conversation was conducted, even if a complex conversation was not considered favorable.

**Enrollment**

1769 Patients assessed for eligibility

24 Patients lost before randomization  
 8 Withdrawal of consent  
 5 Transferred to other hospital ward  
 5 Discharged  
 3 Died  
 3 Medicines reconciliation revealed use of less than 4 regular drugs

1346 Excluded patients  
 913 Not meeting inclusion criteria  
 258 Not asked to participate due to study pharmacist capacity  
 175 Declined to participate

399 Randomized

199 Allocated to control group  
 193 Received allocated care  
 6 Did not receive allocated care - intervention due to severe medicines discrepancy or drug-related problem

**Allocation**

200 Allocated to intervention group  
 123 Received allocated intervention  
 77 Did not receive complete allocated intervention

6 Died during index hospital stay

5 Died during index hospital stay

**Follow-Up**

2 Erroneous inclusions  
 1 Re-inclusion  
 1 Lacking Norwegian personal Identification number

**Analysis**

193 Included in analysis

193 Included in analysis

6 No intervention  
 4 Transferred to other ward  
 2 Discharged

3 Intervention only at hospital admission  
 1 Then transferred to other ward  
 2 Then discharged

184 Intervention at hospital admission & during hospital stay

Intervention at hospital discharge

| Oral information to patient | Written information to patient | Written information to next care level | Number of patients, n |
|-----------------------------|--------------------------------|----------------------------------------|-----------------------|
| Not applicable              | Not applicable                 | No                                     | 8                     |
| No                          | No                             | No                                     | 14                    |
| Yes                         | No                             | No                                     | 11                    |
| No                          | Yes                            | No                                     | 3                     |
| Yes                         | Yes                            | No                                     | 21                    |
| No                          | Yes                            | Yes                                    | 4                     |
| Yes                         | Yes                            | Yes                                    | 123                   |



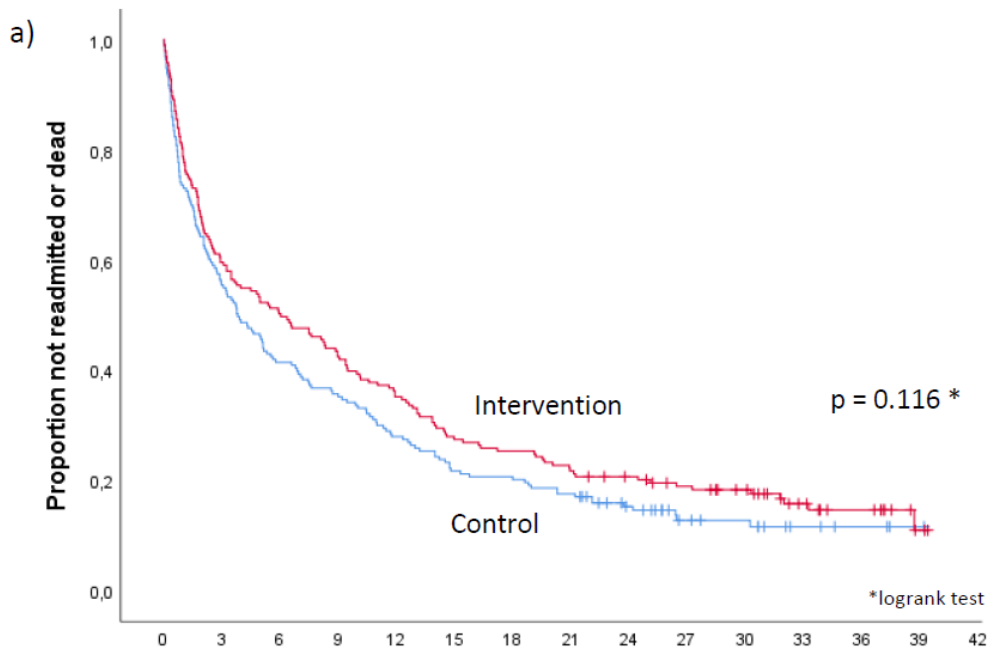

|                | Time since discharge, months |     |    |    |    |    |    |    |    |    |    |    |    |    |
|----------------|------------------------------|-----|----|----|----|----|----|----|----|----|----|----|----|----|
| Number at risk | 0                            | 3   | 6  | 9  | 12 | 15 | 18 | 21 | 24 | 27 | 30 | 33 | 36 | 39 |
| Intervention   | 193                          | 115 | 97 | 82 | 68 | 53 | 49 | 42 | 37 | 31 | 26 | 15 | 10 | 2  |
| Control        | 193                          | 107 | 80 | 69 | 54 | 42 | 40 | 34 | 23 | 13 | 11 | 5  | 3  | 1  |

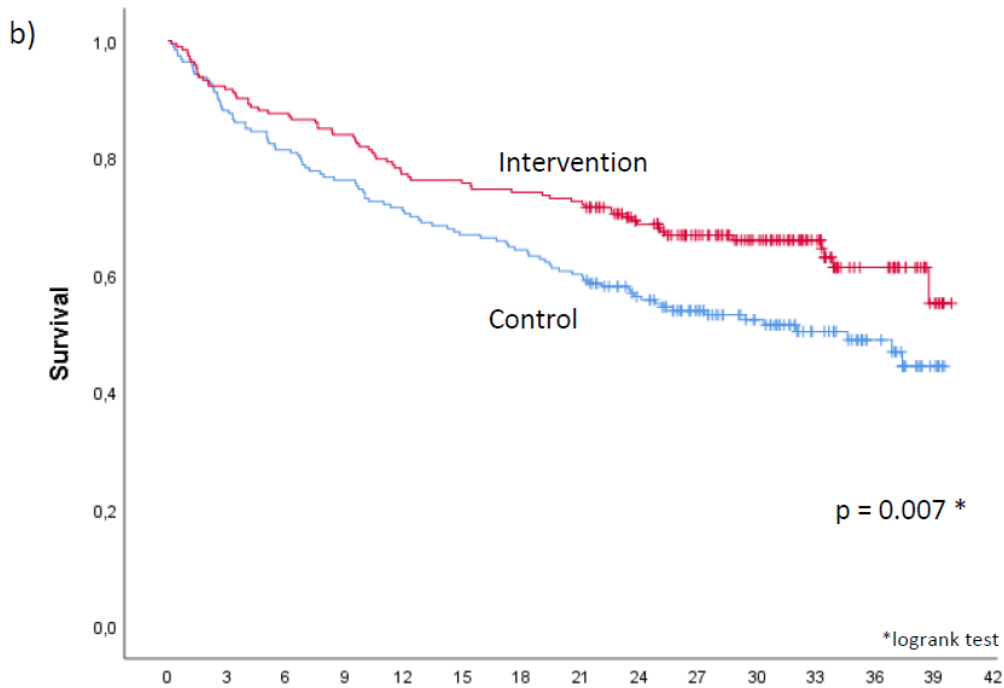

|                | Time since discharge, months |     |     |     |     |     |     |     |     |    |    |    |    |    |
|----------------|------------------------------|-----|-----|-----|-----|-----|-----|-----|-----|----|----|----|----|----|
| Number at risk | 0                            | 3   | 6   | 9   | 12  | 15  | 18  | 21  | 24  | 27 | 30 | 33 | 36 | 39 |
| Intervention   | 193                          | 177 | 169 | 162 | 149 | 146 | 143 | 140 | 115 | 93 | 73 | 49 | 27 | 8  |
| Control        | 193                          | 170 | 157 | 147 | 137 | 129 | 124 | 116 | 97  | 76 | 59 | 40 | 25 | 7  |

## S1 Appendix

### Contents

|                                   |         |
|-----------------------------------|---------|
| Original trial protocol           | Page 2  |
| Protocol amendments               | Page 17 |
| Statistical analysis plan (SAP)   | Page 19 |
| SAP amendment                     | Page 28 |
| Timeline of the study, milestones | Page 29 |

## ORIGINAL TRIAL PROTOCOL

**English title:****Effect of a Pharmacist Intervention on Hospital Readmissions**

**A project at the Internal Medicine Ward, the Medical Clinic, Oslo University Hospital, Norway, in cooperation with Hospital Pharmacies Enterprise, South-Eastern Norway Regional Health Authority and University of Oslo, Norway**

Study protocol version number 1 – 07-04-2014

## Project members

**Project leader and co-supervisor:** Associate professor at University of Oslo, Norway, Head of the internal medicine ward at Oslo University Hospital, Norway, MD, PhD Morten Mowe, [mormow@ous-hf.no](mailto:mormow@ous-hf.no)

**PhD student and responsible study pharmacist:** Marianne Lea, MScPharm, MScClinPharm, [marianne.lea@sykehusapotekene.no](mailto:marianne.lea@sykehusapotekene.no)

**Responsible for the study:** Oslo University Hospital, Norway. Contact: Morten Mowe, head of the internal medicine ward, [mormow@ous-hf.no](mailto:mormow@ous-hf.no)

**Responsible for data processing:** Oslo University Hospital, Norway. Contact: Morten Mowe, head of the internal medicine ward, [mormow@ous-hf.no](mailto:mormow@ous-hf.no)

Other project members and collaborators:

- Espen Molden, professor at the School of Pharmacy, University of Oslo, Norway main supervisor
- Liv Mathiesen, Dr. scient, head of research and development, Hospital Pharmacies Enterprise, co-supervisor
- Kristin Hestad, section head nurse of the internal medicine ward, The Medical Clinic, Oslo University Hospital, project member
- Anne Mette Njaastad, senior physician at the internal medicine ward , The Medical Clinic, Oslo University Hospital, project member
- Kristin Thomassen, quality adviser, The Medical Clinic Oslo University Hospital, project member
- Britt Petterson, nurse at the internal medicine ward , The Medical Clinic, Oslo University Hospital, project member
- Anette Engnes, master student at the School of Pharmacy, University of Oslo, Norway, project member

Torhild Heggstad, MD, PhD, advisor in Helse-Bergen, Norway, collaborator

## Abstract

Several Norwegian studies have shown that pharmacists working in multidisciplinary treatment teams solve and prevent drug-related problems (DRP). Studies investigating the effect of pharmacist interventions on clinical relevant outcome measures are however lacking. Readmissions have both negative clinical and economic consequences, and time to the first readmission is considered as a clinical relevant outcome measure. The main aim of the current study is to investigate the effect of a pharmacist intervention, on patients' time to the first hospital readmission. The study is carried out as a randomised controlled, unblinded study. In total, 400 patients will be included.

Patients acutely admitted to the internal medicine ward at Oslo University Hospital, Ullevaal, using a minimum of 4 regular drugs from a minimum of 2 therapeutic classes (ATC level 1), will be enrolled in the study following written informed consent. The patient inclusion period starts in August 2014, and will last until the target number of patients have been included, estimated to approximately one year.

A "baseline assessment" will be conducted by a pharmacist for all included patients, consisting of medicines reconciliation and review at hospitalization, to measure frequency of DRPs at admission. Retrospectively, an assessment of whether DRPs may have led to the hospitalisation will be conducted, by comparing possible consequences of the DRPs with the admission cause.

Following the baseline assessment, the patients will be randomized to the control- or intervention group. Patients in the control group will receive in-hospital standard care, i.e. without pharmacist involved. Patients in the intervention group will receive a pharmacist intervention comprising inclusion of a pharmacist in the multidisciplinary treatment team during the hospital stay. The pharmacist will conduct medication reconciliation at admission, perform medication reviews during the hospital stay and provide drug information (written and oral) to the patient before discharge, as well as written drug information to the next level of care.

The main outcome measure is difference between the control- and intervention groups in time to the first readmission, in the intention-to-treat population. Data on readmissions will be retrieved from the Norwegian Patient Registry.

**Contents**

1  
2  
3  
4  
5 Project members ..... 3  
6  
7 Abstract ..... 4  
8  
9 Abbreviations: ..... 6  
10 Introduction..... 7  
11  
12 Aim ..... 7  
13  
14 Methods ..... 7  
15  
16 Ethics and safety..... 14  
17  
18 Statistics ..... 15  
19  
20 Time Schedule ..... 15  
21  
22 Budget ..... 16  
23  
24  
25  
26  
27  
28  
29  
30  
31  
32  
33  
34  
35  
36  
37  
38  
39  
40  
41  
42  
43  
44  
45  
46  
47  
48  
49  
50  
51  
52  
53  
54  
55  
56  
57  
58  
59  
60

References..... 16

For peer review only

**Abbreviations:**

|      |                                  |
|------|----------------------------------|
| ATC  | Anatomical Therapeutic Chemical  |
| CIRS | Cumulative Illness Rating Scale  |
| DRP  | Drug-related problem             |
| IMM  | Integrated Medicines Management  |
| ITT  | Intention to treat               |
| MAI  | Medication Appropriateness Index |
| NPR  | Norwegian Patient Registry       |
| REK  | Regional ethics committee        |
| UIO  | University of Oslo               |

## Introduction

The individual patient's drug therapy steadily becomes more complicated (1). It has been estimated that more than half of the drugs prescribed are used inappropriately, and 5-10% of admissions to internal medicine hospital wards can be attributed to inappropriate use of drugs (1). Inappropriate drug use has both clinical and economic consequences and "the Norwegian's" Medicines Agency have estimated that direct cost of hospital admissions caused by adverse drug reactions equals 300-400 million annually (1).

A significant proportion of the medication errors appear at transition points between care levels, due to missing or uncomplete information provided during transition. At hospital admission, errors in the drug lists have been reported in 85-95 % of patients (2, 3). Furthermore, up to 40% of hospitalizations in the elderly are known to be caused by adverse drug reactions, whereof the majority could be avoided (4, 5).

Pharmacists may contribute in multidisciplinary treatment teams in hospitals by tailoring and optimizing patients' drug therapy during hospitalizations, and preventing drug errors at transition points between different levels in the healthcare system (6, 7). In Norway, several studies have shown that pharmacists solve and prevent DRPs when working in multidisciplinary treatment teams in hospitals (8-10), but studies investigating the effect of such interventions on clinical relevant outcome measures is lacking. Readmissions is perceived as a burden to both patients and their relatives, in addition to being resource demanding to the society. Time to the first readmission is therefore considered as a clinical relevant outcome measure.

The internal medicine ward in the Medical Clinic at Oslo University Hospital, Norway, comprises 24 beds, and have around 100 patient admissions per month according to the annual report of the Medical Clinic, Oslo University Hospital. The patients are often multimorbid and use many drugs. The most common reasons for hospitalization are deep vein thrombosis, pulmonary embolism, diabetes and pneumonia. Due to its patient population, the internal medicine ward is a suitable place to conduct the present study.

## Aim

The main aim of this study is to investigate the effect of a pharmacist intervention on the patients' time to the first hospital readmission.

## Methods

- *Study design*  
Randomized controlled, unblinded, intervention study
- *Study location and –period*

The study will be conducted at the internal medicine ward, Oslo University Hospital, Ullevaal location, Norway. Patient inclusion will start autumn 2014, and last until the target number of patients are included. The goal is to include the target number of patients within one year. The follow-up will last for 12 months after discharge for readmissions and contact with emergency rooms, by data from the Norwegian Patient Registry, and mortality, by data from Statistics Norway.

- *Inclusion criteria*



1  
2  
3 Adult women and men acutely admitted to the internal medicine ward, using a minimum of 4  
4 regular drugs from a minimum of 2 therapeutic classes (ATC level 1) before medicines  
5 reconciliation – the latter as a surrogate for the number of diagnoses. If it is revealed during  
6 medicines reconciliation that a patient was using less than 4 regular drugs from less than 2  
7 therapeutic classes (ATC level 1) before hospitalization, the patient will be excluded from the  
8 study.  
9  
10

11 *Exclusion criteria*

- 12  
13  
14
  - Terminally ill patients
  - Patients not able to communicate in Norwegian language or English
  - Patients who do not want to participate in the study
  - Patients previously included into the study, will not be re-included during their  
19 second admission to the general internal medicine ward, neither receive the study  
20 intervention during this second hospitalization

21  
22  
23  
24
  - *Number of patients that will be included*  
25 Readmission frequencies in earlier studies in Ireland and Sweden, as well as Oslo University  
26 Hospital , is estimated to approximately 50% in a year. To be able to detect a 15% absolute  
27 reduction in readmissions, with 80% power, 168 patients must be included to both treatment  
28 groups. To account for dropouts, 200 patients will be included to both the control and the  
29 intervention groups.  
30  
31
  - *Randomization procedure*  
32 Following inclusion, patients will be allocated by a randomization sequence with a permuted  
33 block design, to the control- or intervention group. The Centre for Biostatistics and  
34 Epidemiology, Oslo University Hospital, Norway, is responsible for the randomization  
35 procedure and will deliver allocation envelopes. Study pharmacists will conduct the inclusion  
36 according to the randomizing procedure, for all included patients.  
37  
38  
39  
40  
41  
42  
43  
44  
45  
46  
47  
48  
49  
50  
51  
52  
53  
54  
55  
56  
57  
58  
59

60

• *Flow chart and description of study arms:*

Figure 1 shows the flowchart for the study, including a description of when the different steps in the study should be conducted

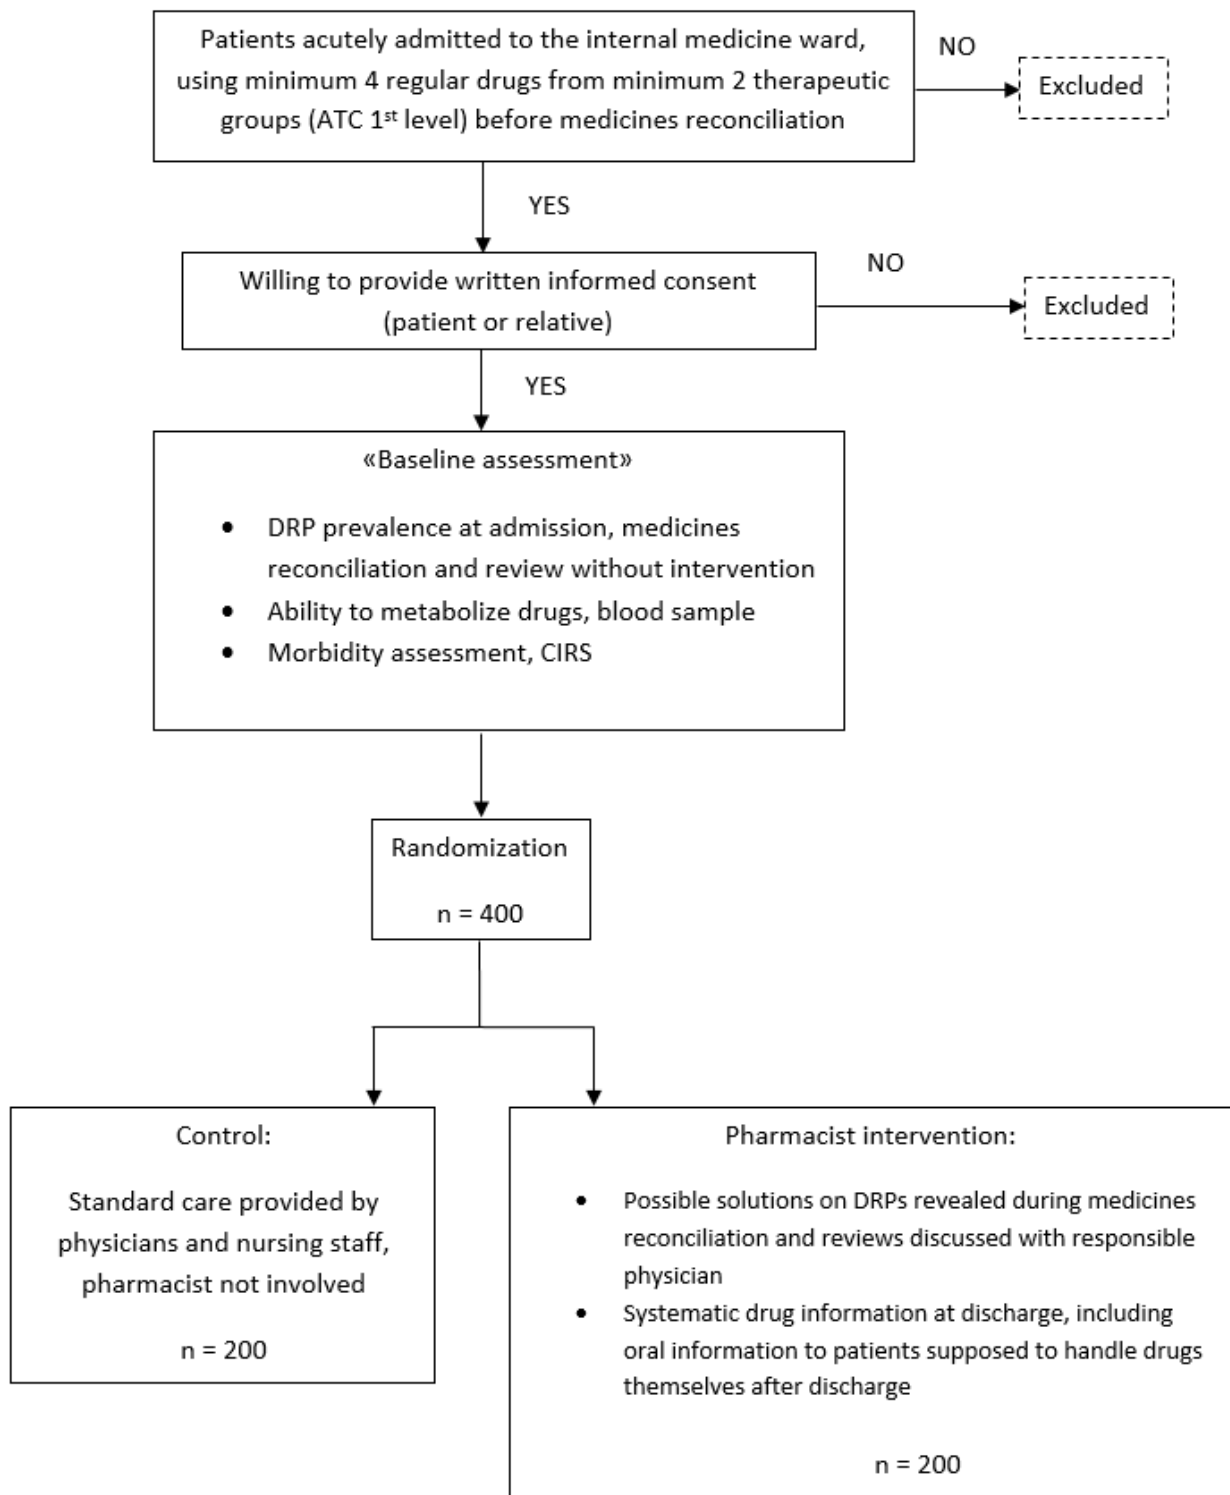

1  
2  
3 Figure 1. Overview over how the study will be conducted.

4 ATC = Anatomical Therapeutic Chemical, DRP = drug-related problems, CIRS = Cumulative Illness Rating Scale.

5  
6 "Baseline assessment"

7  
8 For all included patients, a «baseline assessment» will be conducted, consisting of three steps:

- 9  
10
- 11 ○ Assessing the DRP prevalence at admission, by conducting medicines  
12 reconciliation and –review
  - 13 ○ Assessing the patients` ability to metabolize drugs, as determined from a blood  
14 sample
  - 15 ○ Assessing the patients` morbidity, by using the standardized method Cumulative  
16 Illness Rating Scale (CIRS)
- 17

18 The "baseline assessment" will be conducted before the randomization, to avoid data collection bias.

19  
20 For all included patients, a blood sample (full blood) will be sent to Center for Psychopharmacology at  
21 Diakonhjemmet Hospital, and analysed for the patient`s ability to metabolize drugs. The blood  
22 sample will be drawn as a part of standard blood tests at hospitalization. It will be investigated  
23 whether congenital variation in the ability to metabolize drugs correlates with DRP and/or morbidity.  
24 By comparing possible consequences of DRP at hospitalization, it will be investigated whether DRPs  
25 may have caused the hospitalization. A group of physicians and pharmacists will conduct these  
26 assessments in collaboration.  
27  
28

29  
30 Control group and intervention group

31  
32 Patients randomized to the control group will receive standard care at the internal medicine ward,  
33 provided by physicians and nursing staff, without pharmacist involved. If a physician should request  
34 pharmacist advice regarding a patient randomized to the control group, a pharmacist will deliver this,  
35 and the patient will be excluded from the study.  
36  
37

38 Patients randomized to the intervention group will receive pharmacist intervention in addition to  
39 standard care during the hospital stay. This comprises inclusion of a pharmacist in the  
40 multidisciplinary treatment team around the patients, conducting the following tasks:

- 41  
42
- 43 1) Discussion with physician responsible for the patient regarding possible solutions on  
44 DRPs revealed at baseline (admission) by medicines reconciliation (11) and review  
45 (12). Medicines review will be conducted repeatedly at changes in drug therapy or  
46 the patient`s clinical state.
  - 47 2) Drug information at discharge will be written by a template where all changes in the  
48 patient`s drug list during the hospital stay will be systematically described and  
49 justified. The drug information will be approved by the hospital physician responsible  
50 for the patient`s treatment and delivered to the patient and the next care level at  
51 hospital discharge.
  - 52 3) Oral drug information before discharge, where the aim is to improve the patient`s  
53 adherence, for patients supposed to handle drugs themselves after discharge.  
54  
55  
56  
57

58 Procedures and training

59  
60 Protocol Version number 1, 07.04.2014, Page 9/15

1  
2  
3 The Hospital Pharmacies Enterprise's procedures for the conduct of medicines reconciliation and  
4 review will be followed during the conduct of these tasks (11, 12). The procedures are based on the  
5 "Integrated Medicines Management" (IMM)- model, for clinical pharmacists, developed in Northern  
6 Ireland (6, 13) and further developed in Sweden (14) and Central Norway (15). When working  
7 according to this model, the pharmacists' continuous and systematic evaluation of the patient's drug  
8 treatment at hospital admission (medicines reconciliation), during the hospital stay (medicines  
9 review) and at discharge (systematic drug information) is ensured. Procedures and forms are used  
10 during each step of IMM.  
11  
12  
13

14 Medicines reconciliation involves the identification of a complete and accurate list of drugs currently  
15 in use by a patient, by using different and the most optimal sources of information, including the  
16 patient, their next of kin, home care nurse, nursing home staff, pharmacy and/or general  
17 practitioner. Medicines discrepancies between drugs prescribed at hospitalization and the complete  
18 drug list, are revealed. Medicines review is a systematic review of a patients' drug treatment, using a  
19 checklist of risk categories, where the drugs' effect, safety and indications are evaluated. Potential  
20 and manifested DRPs are revealed.  
21  
22  
23

24 DRPs revealed in patients who, following the baseline assessment are allocated to the control group,  
25 will not be discussed with the physician responsible for the patient's treatment, unless they are  
26 considered by the pharmacists as being of major clinical relevance, i.e. that they may cause  
27 detrimental effects or death. If the pharmacist is in doubt regarding the severity of a DRP, the  
28 decision will be taken by the project leader Dr. nn, or the medical responsible senior physician at the  
29 internal medicine ward, nn. If DRPs with severe clinical relevance are revealed in patients allocated  
30 to the control group, they will be discussed with the ward physician responsible for patient  
31 treatment, and the patient will be excluded from the study.  
32  
33  
34

35 Clinical pharmacists conducting the pharmacist intervention in the study shall attend and get  
36 approval of training in the different working methods;  
37  
38

- 39 ○ Three day theoretical course in medicines reconciliations and reviews by IMM,  
40 followed by practical training including feedback on their individual performance  
41 provided by a clinical supervisor.
- 42 ○ The course "From monologue to dialogue – communicating with patients in  
43 theory and practice", comprising theoretical and practical training in talking with  
44 patients about drugs, with feedback from a supervisor.  
45  
46  
47  
48

- 49 ● *Demographic data and measurements*

50 The following demographic data and measurements will be registered for the study population:  
51  
52

- 53 ✓ Age
- 54 ✓ Sex
- 55 ✓ Cause of hospitalization
- 56 ✓ Diagnoses according to ICD-10, as described in the patient's medical record,  
57 i.e. diagnoses in the epicrisis, and in addition other diagnoses clearly  
58  
59  
60

described in the medical record during the hospital stay, but not listed in the epicrisis.

- ✓ Where the patient is admitted from (home, other hospital, other hospital ward in the same hospital, nursing home, emergency room, general practitioner, municipal emergency room, others)
- ✓ Assistance with handling of drugs prior to admission: nursing home, home nurse, multidose dispensed drugs, patients handling drugs themselves or not
- ✓ Hospital admission date
- ✓ Internal medicine ward admission date
- ✓ Date for last hospitalization (from the Norwegian Patient Registry)
- ✓ Date for medicines reconciliation and review conducted by pharmacist
- ✓ Drug list documented at hospital admission, including over-the-counter drugs, natural/herbal drugs (when documented). Drug name, strength, dosage, formulation (e.g. injection, rectal, oral) and time of dose.
- ✓ Drug list obtained by pharmacist, including over-the-counter drugs and natural/herbal drugs. Drug name, strength, dosage, formulation (e.g. injection, rectal, oral) and time of dose.
- ✓ Source(s) used during the medicines reconciliation (nursing home, general practitioner, multidose delivering pharmacy or next of kin)
- ✓ Drug treatment during the hospital stay
- ✓ Number and type DRPs revealed by medicines reconciliation and review, if the DRPs are discussed with the ward physician responsible for the treatment or not, and eventual results of such discussion
- ✓ Discharge date
- ✓ Where the patient is discharged to (home, other hospital, other ward at the same hospital, nursing home, others)
- ✓ Drug list at discharge. Drug name, strength, dosage, formulation (e.g. injection, rectal, oral) and time of dose.
- ✓ Results from the blood test, ability to metabolize drugs
- ✓ Morbidity at hospitalization, by using Cumulative Illness Rating Scale (CIRS)

The primary endpoint is difference between the control and intervention group in time to the first readmission, for the intention-to-treat-population. Data on readmissions will be obtained from the Norwegian Patient Registry.

Differences in clinically relevant outcome measures will be investigated between patients receiving the pharmacist intervention (intervention group) and patients not receiving pharmacist intervention (control group). Secondary endpoints will include:

- ✓ Number of readmissions during 30 days, 6 months, 12 months
- ✓ Proportion of patients readmitted during 30 days, 6 months and 12 months after discharge
- ✓ Number of contacts with emergency rooms during 30 days, 6 months and 12 months after discharge
- ✓ Proportion of patients in contact with emergency rooms during 30 days, 6 months and 12 months after discharge

- ✓ Number of days to the first readmission
- ✓ Length of stay (days) during the first readmission
- ✓ Number of days to contact with emergency room
- ✓ Mortality: Proportion of patients who dies in the 12 months after discharge
- ✓ Difference in Medicines Appropriateness Index (MAI)-score (16) from admission to discharge
- ✓ Quality of discharge drug information
- ✓ Difference in DRP prevalence (number and type of DRPs) at hospitalization
- ✓ Difference in morbidity (CIIRS) at hospitalization

Further, any difference in “DRP -load” and morbidity (CIRS) at hospitalization will be investigated in patients hospitalized compared to those not hospitalized during the last 6 months before index admission. Any possible causal relationship between DRPs and hospitalizations will be assessed. Congestinal variations in ability to metabolize drugs will be assessed against “DRP-load” and/or morbidity.

The number of phone calls after discharge from the next care level to the internal medicine ward, will be measured by statistical process control (SPC).

Outcome measures including readmissions, emergency room contacts and mortality will be registered in the control- and intervention group at three points of time: 30 days, 6 months and 12 months after discharge. All cause readmissions will be registered. The main cause of readmission or contact with the emergency room will be registered. Data on readmissions and emergency room contacts will be obtained from NPR. Data on mortality will be obtained from Statistics Norway, after necessary permissions from the State Health Authority and the The Norwegian Data Protection Authority are obtained.

- *Privacy policy and information*

Patients will be enrolled following written informed consent. The physician responsible for the patient’s treatment at the hospital decides whether the patient is competent to consent or not. Written informed consent will be obtained from next of kin for patients who are not competent to consent. After written consent is obtained, the patient will be provided a study number. The enrolled patients will have the right to withdraw their consent at any time point, without giving any explanation. The participants will receive a copy of the informed consent. The information leaflet will describe that participation in the study includes extraction of data from the Norwegian Patient Registry and Statistics Norway during the first year after hospital discharge. The signed consents will be stored in a locked cabinet at the hospital together with the code list.

- Processing and storage of data

All data will be handled confidentially and personal, identifiable data will not be taken out of the hospital. The data will be processed without patient names or personal identification numbers, after each participant has been given a study number. The code list linking the study number to the

1  
2  
3 personal identification number, will be stored in a locked cabinet at the hospital, separately from  
4 other data. The code list will be shredded August 2018 at latest. Signed informed consents will be  
5 stored together with the code list. Study forms (paper) will be stored without patient names or  
6 personal identification numbers, in a locked cabinet and unavailable for unauthorized persons.  
7 Electronic data files will be stored without patient names or personal identification numbers, and  
8 processed in a research database at Oslo University Hospitals research server.  
9  
10  
11  
12  
13

- 14 • *Definition of analysis population*

15 An Intention-to-treat (ITT) analysis will be conducted. All randomized patients will be included in the  
16 analysis. Patients lost to follow-up will be included in the analysis as «not readmitted», «not had  
17 contact with emergency rooms». A per protocol analysis will also be conducted. Patients dying during  
18 the study period will only be included in mortality analysis.  
19  
20

## 21 **Ethics and safety**

22  
23 The study hypothesis is that pharmacists' care in the intervention group, will lead to increased quality  
24 of drug treatment compared to the control group, and that this may be reflected by reduced risk of  
25 hospital readmission after discharge. There might be a risk of lower quality drug treatment in the  
26 intervention group. We consider the probability of this to be low.  
27  
28

29 Pharmacists' care during a hospital stay is not included in standard care today. Patients in the control  
30 group will therefore be provided with the same care during their hospital stay, as they would have  
31 been provided with if they did not participate in the study. All included patients will have a  
32 conversation with a pharmacist and a blood sample will be drawn, which is not considered to cause  
33 any disadvantage to the patients. The blood sample will be drawn as a part of the samples taken due  
34 to hospitalization. Before patients are enrolled, they will receive an information leaflet of the study  
35 and they will themselves decide whether they want to participate or not.  
36  
37  
38

39 To document the effect of clinical pharmaceutical intervention in Norwegian hospitals is necessary,  
40 and randomized controlled trials are the gold standard. On this basis, it is considered necessary to  
41 randomize to a control group receiving standard care, i.e. without pharmacist involved. During  
42 standard care at the internal medicine ward, no patients receive pharmacist intervention the way it is  
43 planned conducted in the study. This means that it makes no difference for patients in the control  
44 group, whether the study is conducted or not. If potentially severe DRPs are revealed after  
45 hospitalization, they will be discussed with the responsible ward physician, and the patient will be  
46 excluded from the study. If a physician at the general internal medicine ward request a pharmacist's  
47 opinion in some degree to patients allocated to the control group, this will be provided, and the  
48 patient will be excluded from the study. In this way, the safety of patients in the control group is  
49 secured, and we hence consider the study as ethical acceptable.  
50  
51  
52  
53

54  
55 A biobank will be established, called «blood samples for analysis of drug metabolizing enzymes». The  
56 project leader is responsible for the biobank. Blood samples will be marked with the patient's study  
57 number and locked in and separated from the code list connecting patient identity to study number.  
58  
59  
60

1  
2  
3 The blood samples will be transported by a project group member from the ward at Oslo University  
4 Hospital to Center for Psychopharmacology at Diakonhjemmet Hospital, where the analysis will be  
5 conducted.  
6  
7

8 All collected data will be handled confidentially and personal identifiable data will not be taken out of  
9 the hospital. The data will be processed without patient identification, with a study number per  
10 patient. The code list connecting patient identity to study number will be locked in at the hospital  
11 and separated from other data. The code list will be deleted December 31th 2018 at the latest.  
12 Signed informed consents will be stored locked in, together with the code list. Paper versions of data  
13 registration forms will be without patient identification and stored locked in and not available for  
14 unauthorized persons. Electronical data without patient identification will be stored and processed in  
15 a research database, stored at Oslo University Hospital`s research server.  
16  
17  
18

19 Approvals from Regional committees for medical and health research ethics (REK) and the Personal  
20 Ombudsman will be obtained. For retrieval of data on mortality from Statistics Norway will necessary  
21 approvals be obtained from the State Health Authority and the The Norwegian Data Protection  
22 Authority.  
23  
24

25 There is no conflicts of interests by conducting the study.  
26

## 27 **Statistics**

28 Demographics will be presented as proportions, means with standard deviations or medians with  
29 ranges. The primary endpoint (time to first readmission) will be estimated using Kaplan Meier  
30 analysis and the groups will be compared by log rank test. The frequency endpoints will be analysed  
31 by chi square tests. Continuous variables will be analysed with Mann-Whitney tests or t-tests. A  
32 significance level at 5% will be used.  
33  
34  
35

## 36 **Time Schedule**

37 Spring 2014: Complete study protocol, clarify collaborators  
38

39 By April 8<sup>th</sup> 2014: Application to Regional committees for medical and health research ethics  
40

41 March to August 2014: Necessary training provided to clinical pharmacists  
42

43 May to June 2014: Develop and complete databases and data collection forms  
44

45 August 2014: Data inclusion start, assumed duration of patient inclusion approximately 1 year, then 1  
46 more year before data on readmissions can be retrieved  
47  
48

49 August 2015 to December 2016: Data processing, data analysis, prepare papers  
50

51 Spring 2017: Write PhD thesis  
52

53 Autumn 2017: Submit and defend PhD thesis  
54  
55  
56  
57  
58  
59  
60



## Budget

The project is assigned a PhD grant, 4 years 75% position, from South-Eastern Norway Regional Health Authority, project number 2013055. In addition, an 80% pharmacist position, funded by Oslo University Hospital and the Medical Clinic will be used into the project.

## References

1. White paper number 18 (Norway 2004-2005). [Right direction towards more optimal use of drugs.] Legemiddelpolitikken.
2. Myhr R, Kimsas A. [Medication errors when transferring within health care services]. Tidsskrift for den Norske lægeforening : tidsskrift for praktisk medicin, ny raekke. 1999;119(8):1087-91.
3. Midlov P, Bergkvist A, Bondesson A, Eriksson T, Hoglund P. Medication errors when transferring elderly patients between primary health care and hospital care. Pharmacy world & science : PWS. 2005;27(2):116-20.
4. Lazarou J, Pomeranz BH, Corey PN. Incidence of adverse drug reactions in hospitalized patients: a meta-analysis of prospective studies. JAMA. 1998;279(15):1200-5.
5. Beijer HJ, de Blaey CJ. Hospitalisations caused by adverse drug reactions (ADR): a meta-analysis of observational studies. Pharm World Sci. 2002;24(2):46-54.
6. Scullin C, Scott MG, Hogg A, McElnay JC. An innovative approach to integrated medicines management. Journal of evaluation in clinical practice. 2007;13(5):781-8.
7. Hellstrom LM, Bondesson A, Hoglund P, Midlov P, Holmdahl L, Rickhag E, et al. Impact of the Lund Integrated Medicines Management (LIMM) model on medication appropriateness and drug-related hospital revisits. Eur J Clin Pharmacol. 2011;67(7):741-52.
8. Blix HS, Viktil KK, Moger TA, Reikvam A. Characteristics of drug-related problems discussed by hospital pharmacists in multidisciplinary teams. Pharm World Sci. 2006;28(3):152-8.
9. Blix HS, Viktil KK, Reikvam A, Moger TA, Hjemaas BJ, Pretsch P, et al. The majority of hospitalised patients have drug-related problems: results from a prospective study in general hospitals. European journal of clinical pharmacology. 2004;60(9):651-8.
10. Viktil KK, Blix HS, Moger TA, Reikvam A. Interview of patients by pharmacists contributes significantly to the identification of drug-related problems (DRPs). Pharmacoepidemiology and drug safety. 2006;15(9):667-74.
11. Hospital Pharmacies Enterprise, South-Eastern Norway Regional Health Authority. Procedure for medicines reconciliation. Internal document.
12. Hospital Pharmacies Enterprise, South-Eastern Norway Regional Health Authority. Procedure for medicines review. Internal document.
13. Scullin C, Hogg A, Luo R, Scott MG, McElnay JC. Integrated medicines management - can routine implementation improve quality? Journal of evaluation in clinical practice. 2012;18(4):807-15.
14. Eriksson T, Holmdahl L, Bondesson Å, Midlov P, Hoglund P. [Medicine and pharmacy cooperation for more optimal use of drugs: the LIMM-model]. I vården. 2010;9:22-7.
15. Major ALS. Integrated Medicines Management in Central Norway. EJHPPractice. 2011;17(4):10-.
16. Hanlon JT, Schmader KE, Samsa GP, Weinberger M, Uttech KM, Lewis IK, et al. A method for assessing drug therapy appropriateness. Journal of clinical epidemiology. 1992;45(10):1045-51.

## PROTOCOL AMENDMENTS

### June 16<sup>th</sup> 2014

Amendment to “Inclusion criteria”: To count the number of drugs from different ATC groups, all drugs marked as “used before hospital admission”, i.e. marked with “→” on the paper medical record, either by physicians at the internal medicine ward or at another hospital ward which the patient is transferred from, should be included. If the patient is transferred from another hospital ward where drugs used before hospital admission clearly are not written on the paper medical record, e.g. the intensive care unit, number of drugs described in the electrical admission record, should be counted.

### August 15<sup>th</sup> 2014

Amendment to “Inclusion criteria”:

- The patient must have a Norwegian personal identification number (to be able to retrieve readmission data from the Norwegian Patient Registry)

Amendments to “Exclusion criteria”:

- Patients isolated due to severe infections
- Patients with temporary lack of consent due to acute illness, assessed by the responsible ward physician. If the patient have not handled their drugs themselves before hospitalization, and consent can be retrieved from the patients next of kin, the patient may be included.

### June 7<sup>th</sup> 2016

Charlson comorbidity index (CCI) score will be used as the morbidity measure, instead of CIRS.

### April 10<sup>th</sup> 2017

The data collected in the study will be used in additional analysis. The aim is to investigate which patients who will benefit most of the pharmacist intervention, and which patients that have the highest risk of hospital readmissions. We will also investigate the importance of the different components of the intervention. Data from all included patients in both the intervention and the control group will be used to investigate significant explanatory variables for the risk of readmissions.

Candidate variables will consist of both clinical and drug-related variables. A Cox regression analysis will be conducted, with “time to first readmission or death” as dependent variable.

Candidate variables will be:

- Age
- Sex
- Kidney function
- Pharmacogenetic variability in drug metabolizing enzymes
- If the patient is admitted from or discharged to a nursing home or home nurse care
- If the patient receives multidose dispensed drugs

- 1
- 2
- 3 • Length of hospital stay
- 4
- 5 • Charlson Comorbidity Index?
- 6
- 7 • Diagnoses, e.g.
- 8
  - 9 ○ Lung diseases
  - 10 ○ Heart failure
  - 11 ○ Coronary disease
  - 12 ○ Malignant disease
  - 13 ○ Dementia
- 14
- 15 • Drug related variables
- 16
  - 17 ○ Number of drugs at hospital discharge
  - 18 ○ Drugs in different ATC groups
- 19
- 20
- 21
- 22

23 The modelling will start with univariate analysis of all variables which may be associated with time to first  
24 readmission. Explanatory variables with p values < 0.2 will be included in the multivariate analysis. Dependant  
25 on the number of explanatory variables to be included in the multivariate analysis, the variables in the final  
26 model will be decided by 1) forward inclusion of one and one variable or 2) backwards elimination of one and  
27 one variable, until the model consists of only statistically significant variables.

28 To investigate if subgroups of patients have increased effect of the intervention, an interaction term will be  
29 added to the model, the same way as described above.

31 The model will be validated with data collected in a new cohort of patients from the internal medicine ward and  
32 from observational data from other internal medicine wards at hospitals in the South-Eastern Norway Regional  
33 Health Authority.

34 The study is approved with end-date October 31<sup>st</sup> 2017, and storing of data until October 31<sup>st</sup> 2022. Due to the  
35 planned additional analysis, new end-date will be January 1<sup>st</sup> 2020, and data will be stored until January 1<sup>st</sup>  
36 2025.

#### 40 May 22<sup>th</sup> 2018

41 According to the original protocol mortality outcome data would be retrieved 12 months after index hospital  
42 discharge for each patient. Since the inclusion period lasted 1.5 years, followed by time spent on developing of  
43 the research database, we were unable to conduct data analysis before now. The first patient was enrolled August  
44 2014, the last March 2016. Follow-up regarding mortality will be extended to December 31<sup>st</sup> 2017 for all  
45 included patients, to increase statistical power.

#### 48 June 26<sup>th</sup> 2018

49 According to the original protocol readmission outcome data would be retrieved 12 months after index hospital  
50 discharge for each patient. Since the inclusion period lasted 1.5 years, followed by time spent on developing of  
51 the research database, we were unable to conduct data analysis before now. The first patient was enrolled August  
52 2014, the last March 2016. Follow-up regarding readmissions will be extended to December 31<sup>st</sup> 2017 for all  
53 included patients. The primary endpoint will however not be changed, but remain as detailed in the statistical  
54 analysis plan which was signed May 25<sup>th</sup> 2018.

## Statistical analysis plan – Oslo pharmacist intervention study - effect on readmissions (OPERA)

### 1. Introduction

The aim of this study is to investigate the effect of an in-hospital pharmacist intervention in multimorbid patients using at least four drugs. The study is registered in Clinicaltrials.gov (NCT02336113). Some basic elements from the study protocol are recapitulated below. The aim of this document is, prior to the conduction of analysis, to establish a detailed plan for statistical analysis, beyond what is written in the protocol.

#### *Inclusion and exclusion criteria*

Inclusion criteria were age  $\geq 18$  years, Norwegian citizen, unplanned hospitalization, and use of a minimum of four regular drugs at admission. The drugs were required to represent a minimum of two Anatomical Therapeutic Chemical (ATC) groups [1] at 1st level to enrich the inclusion of multimorbid patients.

Patients who were i) terminally ill, ii) isolated due to severe infections or iii) unable to communicate in Norwegian or English and in lack of an interpreter, were excluded. Patients readmitted during the study period were not eligible for a second inclusion. Patients, for whom medicines reconciliation revealed use of less than four regular drugs at admission, were excluded.

#### *Randomization and blinding*

The patients were randomized 1:1 to usual care or pharmacist intervention. Staff at the Centre for Biostatistics and Epidemiology, Oslo University Hospital, was responsible for the randomization procedure. This staff had no contact with the patients, study pharmacists or ward staff. A permuted block randomization was generated and delivered to the study pharmacists in sequentially numbered, opaque, sealed envelopes. Investigators were blinded to block size. In order to minimize the risk of selection bias, the randomization took place after patient inclusion, after baseline assessments were conducted. The randomization envelopes were drawn by one of the study pharmacists after controlling that the envelope with the lowest number was used.

It was not feasible to blind the patients or the study pharmacists. Nor was it feasible to blind ward staff to which patients were allocated to the pharmacist intervention group. The ward staff were however not informed of which patients that were control patients in the study. Data on readmissions were provided by The Norwegian Patient Registry and data on deaths were provided by The Norwegian Cause of Death Registry, by staff blinded for group allocation.

#### *Primary endpoint*

The primary endpoint is difference between the patient groups in time to the first unplanned hospital admission or death within 12 months after index stay discharge.

### ***Secondary endpoints***

Secondary endpoints are differences between the patient groups in:

- Time to the first unplanned readmission within 12 months after index stay discharge (censored for deaths)
- Number of unplanned and planned readmissions per patient, within 30 days, 6 months and 12 months after index discharge
- Proportion of patients unplanned hospitalized within 30 days, 6 months and 12 months after index discharge
- Proportion of patients dead or unplanned hospitalized within 30 days, 6 months and 12 months after index discharge
- Proportion of patients dead within 30 days, 6 months, 12 months and 20 months after index discharge
- Length of hospital stay of the first unplanned readmission
- Total mortality, from index discharge date until 31.12.2017
- Change in Medicines Appropriateness Index (MAI)-score [2] from index hospital admission to index hospital discharge
- Quality of drug discharge information at index hospital discharge

Some of the secondary endpoint analyses may be published in separate papers.

### ***Background variables***

The following background variables have been collected:

- Age
  - Sex
  - Reason for admission
  - Medicine administration assistance prior to admission, and after discharge, i.e. receiving drugs from a home care nurse
  - Living situation prior to admission, and after discharge, i.e. living at home or at a nursing home
  - Diagnoses (ICD-10)
  - Charlson Comorbidity Index Score [3]
  - Last hospital admission, up to 6 months prior to index stay
  - Date for index hospital admission and discharge, hence length of index stay
  - Drugs prior to admission, during hospital stay and at hospital discharge, including posology
  - Drug-related problems at baseline for all included patients
  - Drug related problems during hospital stay for intervention patients
  - Genetic variability in drug metabolizing enzymes
  - Body-mass index
  - Glomerular filtration rate
  - Serum-albumine
  - C reactive protein (CRP)
-

### *Power calculation*

The sample size calculation was based on a previous study on a similar patient population reporting a readmission frequency of 50% in 12 months [4], as well corresponding readmission frequencies for patients discharged from the internal medicine ward (information from South-Eastern Norway Regional Health Authority). It was estimated that to detect a 15% absolute reduction in hospital readmissions with 80% power and a significance level of 5%, we would require 168 patients in each group. To compensate for any drop outs a total of 200 patients in each group were enrolled in the study.

Since a survival analyse utilizes the information better than a comparison of proportions at a given time, the power will be somewhat higher than estimated above.

### *Patient flow*

Patient flow is illustrated in Figure 1. Figure 2 shows a further description of the 200 patients allocated to the pharmacist intervention group.



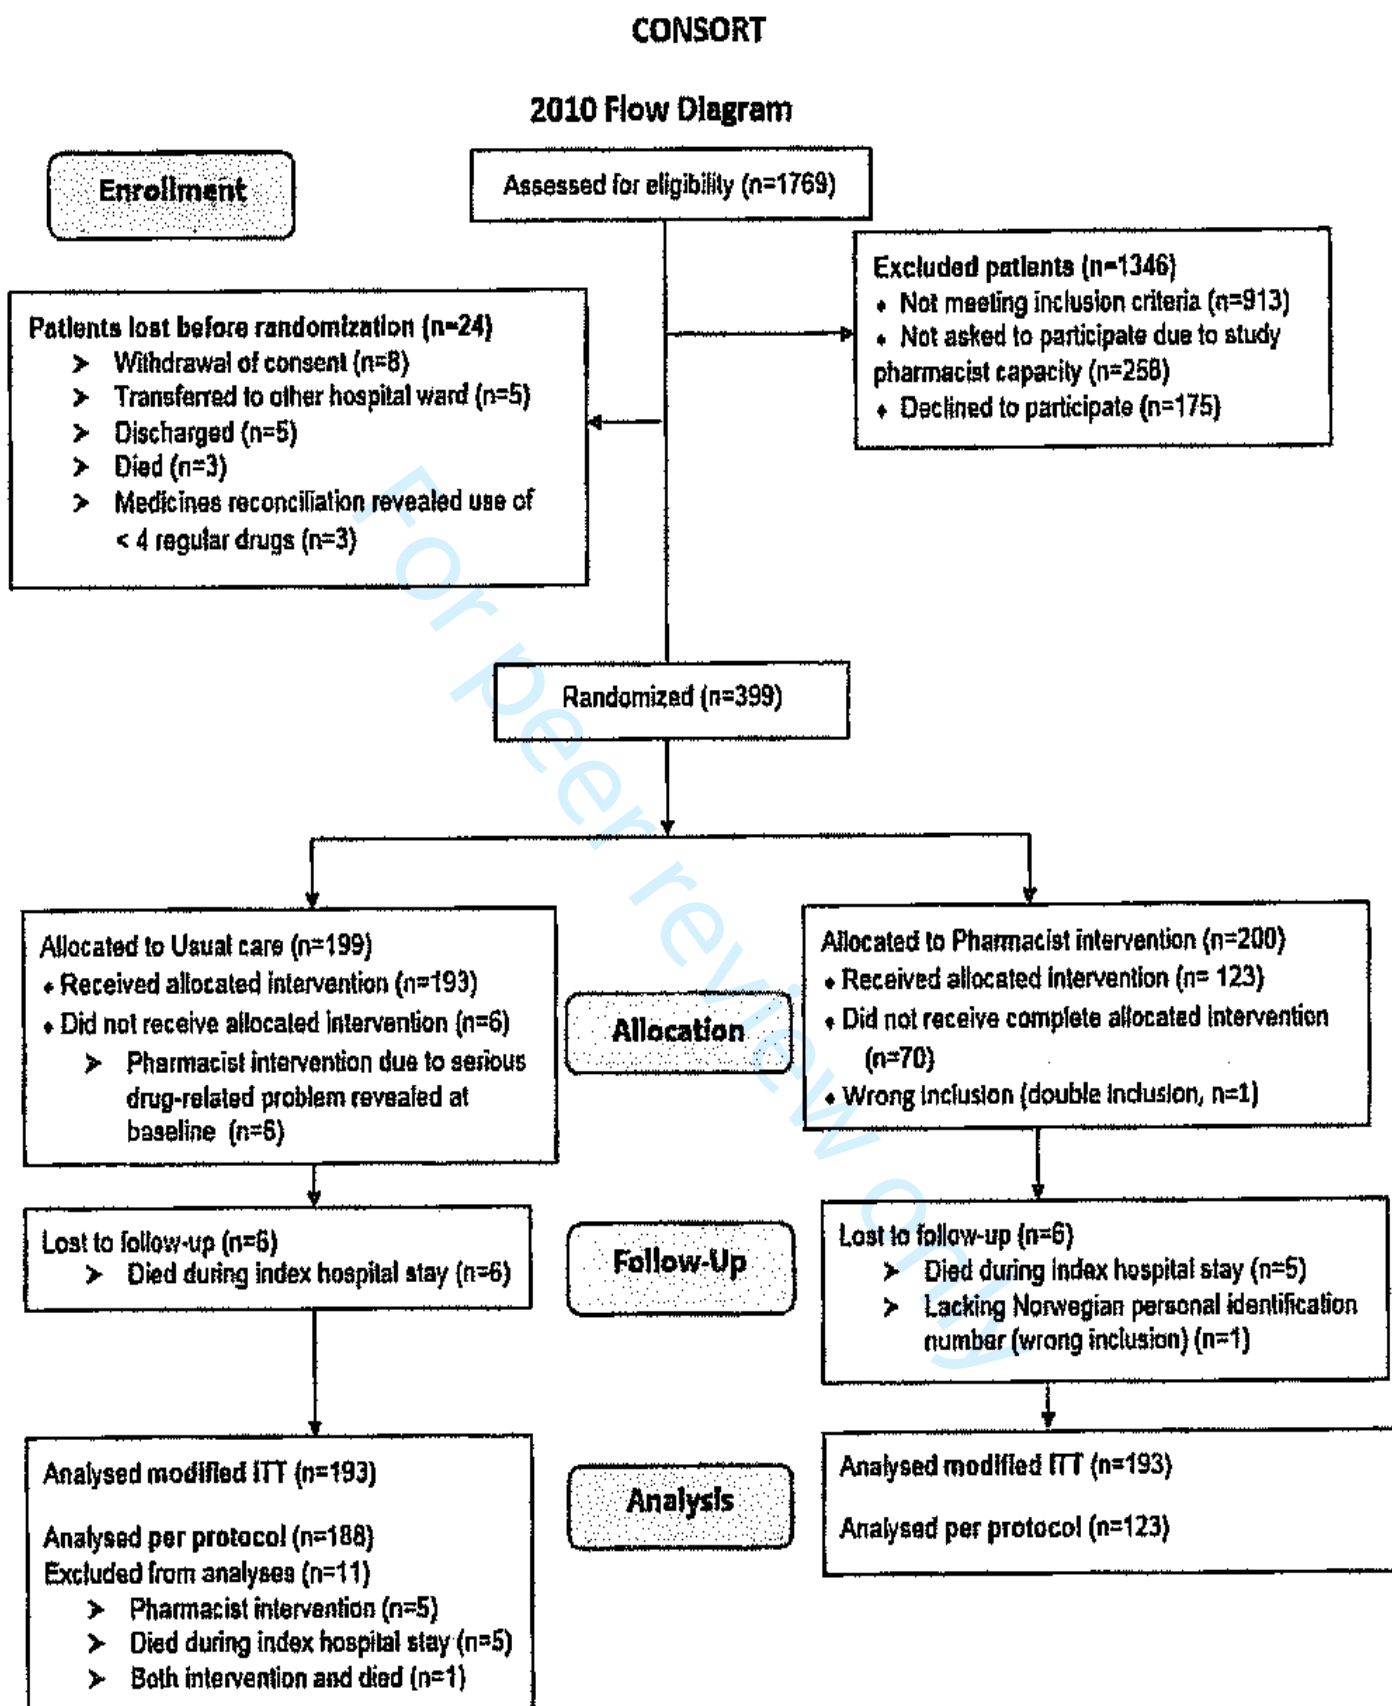

Figure 1. Patient flowchart. ITT = intention to treat.

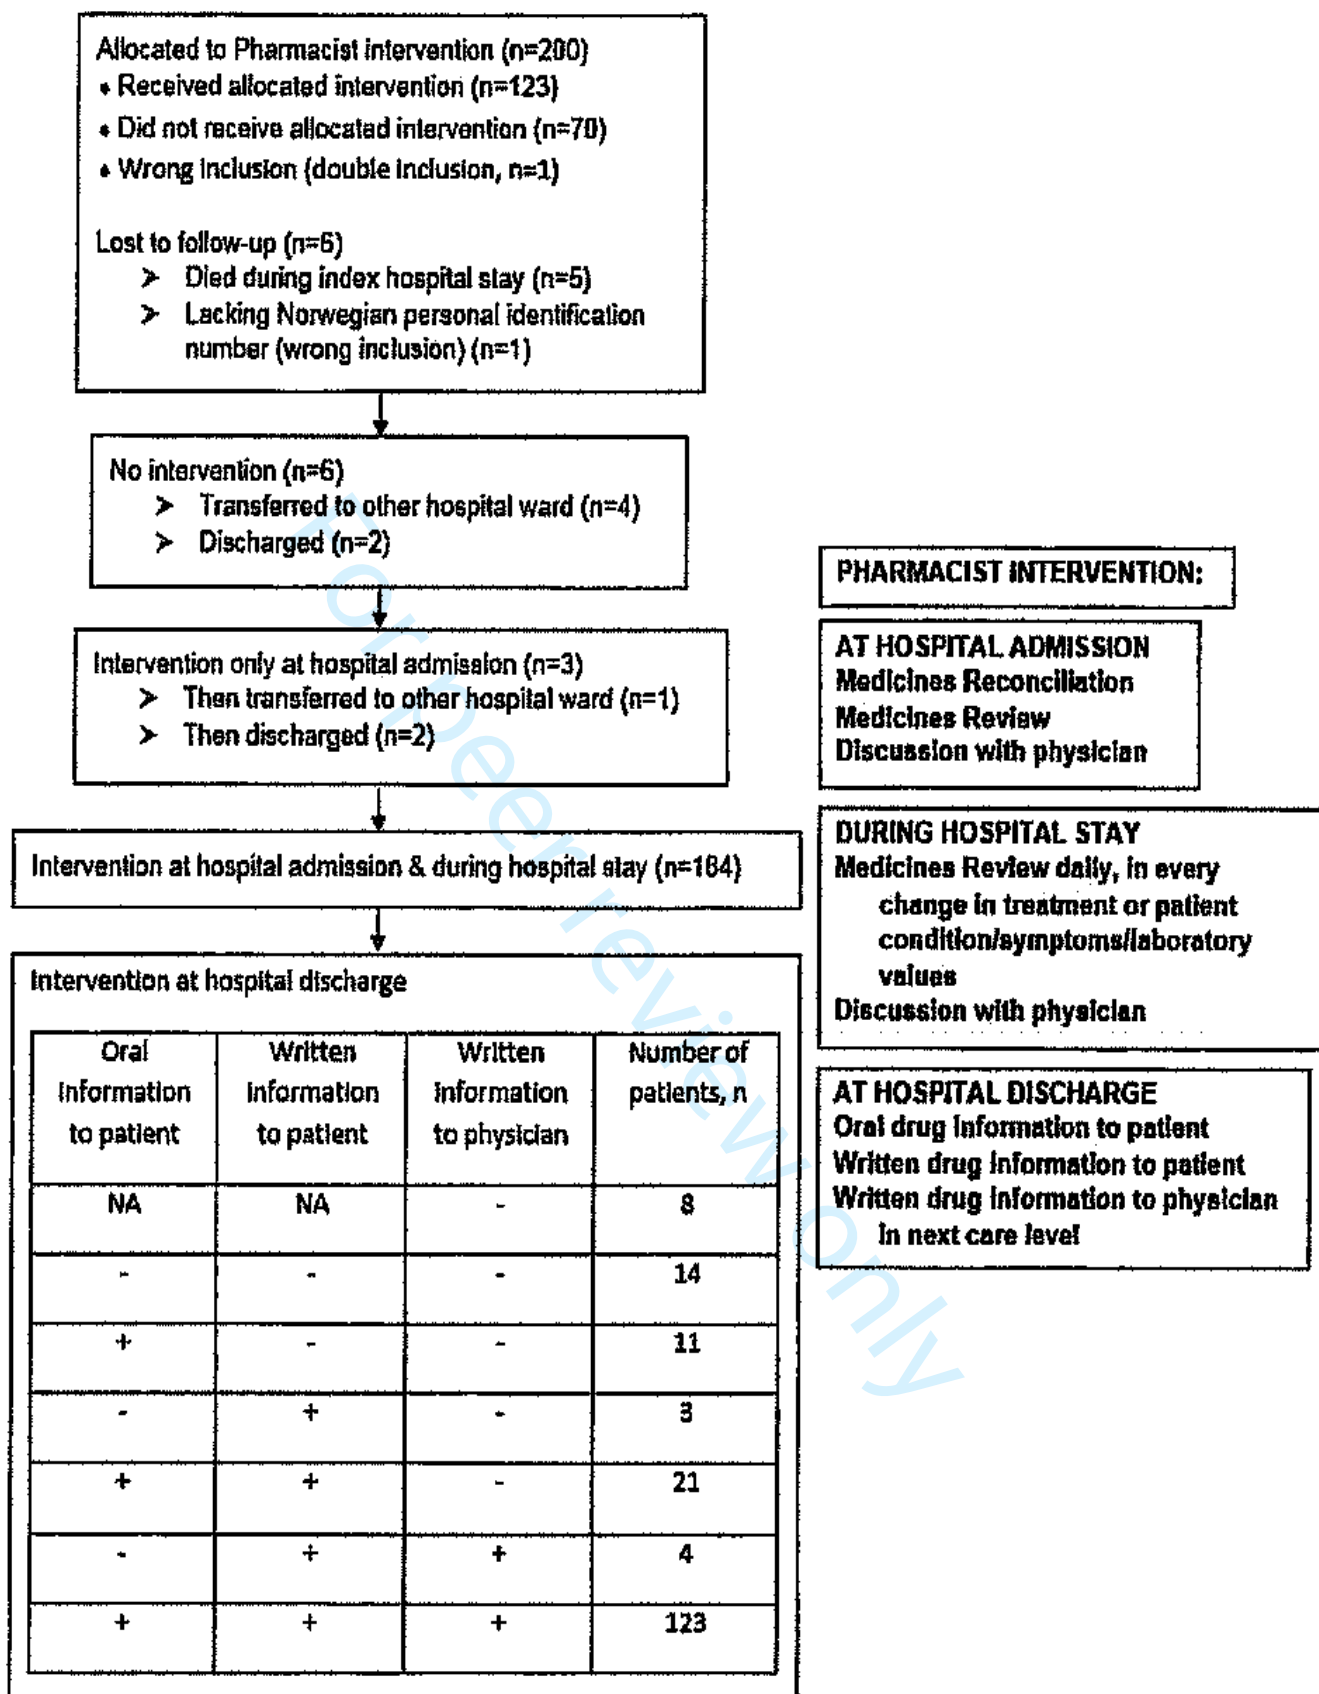

Figure 2. Flowchart further describing the patients allocated to the pharmacist intervention group. NA = not applicable.



### ***Definition of analysis populations***

The primary efficacy analysis is a modified intention to treat (MITT):

- Patients who died during the index hospital stay were excluded because they never were discharged and at risk for hospital readmissions or death after discharge.
- One patient was lost to follow up due to a lack of Norwegian personal Identification number (wrong inclusion) and was excluded.
- One patient was wrongly included, in terms of being a readmitted patient, already included in the study. The second, wrong inclusion, was excluded. The patient is included in the analysis using data related to the first admission.

A per protocol (PP) analysis consists of patients that received the complete allocated intervention:

- In the control group, for patients with drug related problems revealed at baseline suspected to cause detrimental effects or death if not acted upon, the study pharmacist intervened. These patients were excluded.
- In the pharmacist intervention group, all patients receiving none or only parts of the predefined intervention were excluded.

## **2. Primary endpoint analysis**

The primary endpoint analysis will be done at the MITT population.

The primary endpoint analysis is a time-to-event analysis. The Kaplan Meier method and the log-rank test will be applied. Further, a Cox proportional hazards model will be applied to estimate hazard ratios. A p value below 0.05 will be regarded as statistically significant. Hazard ratios will be presented with 95% confidence intervals. The analysis will be performed in SPSS.

## **3. Handling of protocol violations**

### ***Wrongly included patients (n=2)***

One patient was wrongly included, lacking a Norwegian personal identification number. This identification number is essential to collect information on hospital admissions and death respectively from The Norwegian Patient Registry and The Norwegian Cause of Death Registry. We have therefore chosen to exclude this patient from the analyses.

One patient was wrongly included, in terms of being included in the study earlier, hence the second inclusion actually was a hospital readmission. The second inclusion of the patient is therefore excluded from the analyses.

### ***Patients lost before randomization (n=24)***

A few patients were lost before the randomization took place, due to different reasons listed in Figure 1. These 24 patients are will be excluded from all analyses.

### ***Randomized patients who died during the index hospital stay (n=11)***

Five patients in the intervention group and six patients in the control group died during the index hospital stay. As we defined the start point for the 12 months follow up at hospital discharge, we have chosen to exclude these 11 patients both from the MITT and PP analysis populations.

### ***Patients not handled according to randomisation***

These patients are described under the section *Definition of analysis populations*.

## **4. Handling of missing data**

No missing data on readmissions or mortality is present for the patient population MITT or PP. When data is missing in background variables, results will be presented with specified total number of patients contributing to each variable.

## **5. Sensitivity analysis**

A per protocol analyses will be performed.

## **6. Variables of adjustments**

Since the present study is a randomized controlled trial, there should by default not be done any adjustments. However, if the patients in the control and intervention group turn out to be substantially different in some of the background variables, it will be considered if adjustments have to be made, in additional analyses.

## **7. Secondary endpoint analysis**

Time to the first unplanned hospital readmission within 12 months after index discharge date, censored for deaths, will be analysed with the Kaplan Meier method and the log-rank-test. Hazard ratios with 95% confidence intervals will be estimated using a Cox proportional hazards model.

Total mortality will be analysed as a time-to-event analysis. To exploit the long time period of both inclusion and follow up in the study, all patients will be followed until 31.12.2017 regarding total mortality. The Kaplan Meier method and the log-rank test will be applied. Further, a Cox proportional hazards model will be applied to estimate hazard ratios. Hazard ratios will be presented with 95% confidence intervals.

Continuous variables will be analysed by two-sample t-tests. If extreme outliers are identified, variables will be analysed with the Mann-Whitney test. Proportions will be analysed with the Chi square test.

All analyses will be performed in SPSS. P values below 0.05 will be regarded as statistically significant.

## 8. Blind analysis

The project administrator and PhD student (ML) has been one of the main study pharmacists, as well as building the research database, has in depth knowledge of the data files, and may recognize whether the patient is in the control or intervention group. Neither the main supervisor (LM) nor the statistician (ES) have been involved in data collection, data punching or in preparation of the data files to statistical analyses.

To maintain blind analyses and prevent bias due to the expectations of the project administrator, data analyses on the primary endpoint, will be performed as follows: ML prepares the data files replacing a random letter to patients in the control group and another random letter to the patients in the intervention group. This new allocation code is written and stored safely and not provided to LM or ES. LM and ES receive the dataset with the new code for the allocated group and carry out the primary analysis. When the statistical analysis is finalized, group allocation will be unblinded by ML, with LM and ES present.

## 9. References

1. World Health Organization (WHO) Collaboration Centre for Drug Statistics Methodology, ATC/DDD Index. [cited 2018 03.04]. Available from: [https://www.whocc.no/atc\\_ddd\\_index/](https://www.whocc.no/atc_ddd_index/).
2. Hanlon JT, Schmader KE, Samsa GP, Weinberger M, Uttech KM, Lewis IK, et al. A method for assessing drug therapy appropriateness. *J Clin Epidemiol.* 1992;45(10):1045-51.
3. Charlson ME, Pompei P, Ales KL, MacKenzie CR. A new method of classifying prognostic comorbidity in longitudinal studies: development and validation. *J Chronic Dis.* 1987;40(5):373-83.
4. Scullin C, Scott MG, Hogg A, McElnay JC. An innovative approach to integrated medicines management. *J Eval Clin Pract.* 2007;13(5):781-8.

## 10. Signatures

We hereby vouch for the fidelity of the study to this statistical analysis plan.

Oslo and Trondheim, Norway, 25 th May 2018



**Marianne Lea, MSc, PhD student**

**Project administrator**

**Hospital Pharmacies Enterprise, South Eastern Norway & University of Oslo**



**Eva Skovlund, MSc, PhD**

**Professor of medical statistics**

**Norwegian University of Science and Technology, NTNU**



**Liv Mathiesen, MSc, PhD**

**Associate professor in clinical pharmacy**

**Main supervisor**

**University of Oslo**

### Statistical analysis plan amendment 30<sup>th</sup> May 2018

We discovered that one of the secondary endpoints not was in accordance with a change we made 2<sup>th</sup> May 2018 after discussions with and recommendations from the Norwegian patients registry (NPR). The following secondary endpoint will therefore be changed from:

- Number of unplanned and planned readmissions per patients within 30 days, 6 months and 12 months after index discharge

to:

- Number of unplanned readmissions per patient within 12 months after index discharge

Documentation:

Excerpt of email correspondence with NPR 2<sup>th</sup> May 2018:

---

**Fra:** Marianne Lea [<mailto:mlea10@hotmail.com>]  
**Sendt:** 2. mai 2018 08:50  
**Til:** Trude Solbakken  
**Emne:** Re: SV: SV: [17/20673](#) Søknad om data fra NPR

Hei,

Bra!

Ja, har forstått at dere ikke har data på legevakt/KADer, men at dere hadde info på om sykehusinnleggelsen var akutt eller planlagt? I forhold til reinnleggelser er det akutte innleggelser vi er ute etter, ikke planlagte/elektive.

Hilsen Marianne

2. mai 2018 kl. 08:41 skrev Trude Solbakken  
<[Trude.Solbakken@helseidir.no](mailto:Trude.Solbakken@helseidir.no)>:

Excerpt of letter from (original correspondence 13.12.2017)

Avdeling helseregistre skal motta utvalget fra søker. I forbindelse med gjennomgang av søknaden og dialog med søker (08.12.2017 og 12.12.2017) tas det sikte på at det skal utleveres opplysninger om følgende forhold:

- Tidspunkter for innleggelser og utskrivelser for evt siste sykehusopphold de siste 12 mnd før innleggesdatoen i studien
- Antall sykehusinnleggelser de siste 6 månedene før innleggesdatoen i studien
- Tidspunkter for innleggelser og utskrivelser for første gjeninnleggelse på sykehus etter utskrivelsesdatoen i studien
- Antall gjeninnleggelser i løpet av 12 måneder etter utskrivelsesdatoen i studien
- Hovedårsak til første gjeninnleggelse
- Antall kontakter med legevakt i løpet av 12 måneder etter utskrivelsesdatoen i studien

Søker er orientert om at det ikke er mulig å skille mellom legevakt og sykehus, men at det finnes informasjon om kontakten/innleggelsen er ø-hjelp eller planlagt.

## TIMELINE OF THE STUDY, MILESTONES

August 15, 2012: Original Trial protocol written

December 20, 2012: Received funding - PhD grant

March 2013 to December 2013: Maternity leave PhD student

January to August 2014 - Practical planning of data inclusion period

May 2014: Necessary approvals obtained

June 2014: Registration of the trial, based on the original trial protocol, in [clinicaltrials.gov](http://clinicaltrials.gov), identifier: NCT02336113. The trial was published on [clinicaltrials.gov](http://clinicaltrials.gov)'s website in January 2015.\*

August 30, 2014: Patient inclusion started

March 17, 2016: Patient inclusion completed

December 31, 2017: Last day of follow-up on readmissions and mortality

June 2017 to May 2018 Application process for outcome data to the Patient Registers\*\*

May 25, 2018: Statistical analysis plan was finalized and signed, hereunder analysis population defined and endpoint analyses detailed

May 29 to June 6, 2018 Outcome data files from Patient registries prepared for analysis

June 8, 2018 Blinded outcome analyses conducted

\* Due to a minor Protocol Registration and Results System (PRS) review comment. However, a clarification in the outcome measure, i.e. that readmission data should be collected from the Norwegian Patient Registry, was the only addition made from the original registration made in June 2014.

\*\*Huge workload at the Registers entails a very long processing time for outcome data.



 CONSORT CHECKLIST
**Table.** CONSORT 2010 Checklist of Information to Include When Reporting a Randomized Trial<sup>a</sup>

| Section and Topic                                    | Item No. | Checklist Item                                                                                                                                                                              | Reported on Page No. |
|------------------------------------------------------|----------|---------------------------------------------------------------------------------------------------------------------------------------------------------------------------------------------|----------------------|
| <b>Title and abstract</b>                            |          |                                                                                                                                                                                             |                      |
|                                                      | 1a       | Identification as a randomized trial in the title                                                                                                                                           |                      |
|                                                      | 1b       | Structured summary of trial design, methods, results, and conclusions (for specific guidance see CONSORT for abstracts)                                                                     |                      |
| <b>Introduction</b>                                  |          |                                                                                                                                                                                             |                      |
| Background and objectives                            | 2a       | Scientific background and explanation of rationale                                                                                                                                          |                      |
|                                                      | 2b       | Specific objectives or hypotheses                                                                                                                                                           |                      |
| <b>Methods</b>                                       |          |                                                                                                                                                                                             |                      |
| Trial design                                         | 3a       | Description of trial design (such as parallel, factorial) including allocation ratio                                                                                                        |                      |
|                                                      | 3b       | Important changes to methods after trial commencement (such as eligibility criteria), with reasons                                                                                          |                      |
| Participants                                         | 4a       | Eligibility criteria for participants                                                                                                                                                       |                      |
|                                                      | 4b       | Settings and locations where the data were collected                                                                                                                                        |                      |
| Interventions                                        | 5        | The interventions for each group with sufficient details to allow replication, including how and when they were actually administered                                                       |                      |
| Outcomes                                             | 6a       | Completely defined prespecified primary and secondary outcome measures, including how and when they were assessed                                                                           |                      |
|                                                      | 6b       | Any changes to trial outcomes after the trial commenced, with reasons                                                                                                                       |                      |
| Sample size                                          | 7a       | How sample size was determined                                                                                                                                                              |                      |
|                                                      | 7b       | When applicable, explanation of any interim analyses and stopping guidelines                                                                                                                |                      |
| Randomization                                        |          |                                                                                                                                                                                             |                      |
| Sequence generation                                  | 8a       | Method used to generate the random allocation sequence                                                                                                                                      |                      |
|                                                      | 8b       | Type of randomization; details of any restriction (such as blocking and block size)                                                                                                         |                      |
| Allocation concealment mechanism                     | 9        | Mechanism used to implement the random allocation sequence (such as sequentially numbered containers), describing any steps taken to conceal the sequence until interventions were assigned |                      |
| Implementation                                       | 10       | Who generated the random allocation sequence, who enrolled participants, and who assigned participants to interventions                                                                     |                      |
| Blinding                                             | 11a      | If done, who was blinded after assignment to interventions (for example, participants, care providers, those assessing outcomes) and how                                                    |                      |
|                                                      | 11b      | If relevant, description of the similarity of interventions                                                                                                                                 |                      |
| Statistical methods                                  | 12a      | Statistical methods used to compare groups for primary and secondary outcomes                                                                                                               |                      |
|                                                      | 12b      | Methods for additional analyses, such as subgroup analyses and adjusted analyses                                                                                                            |                      |
| <b>Results</b>                                       |          |                                                                                                                                                                                             |                      |
| Participant flow (a diagram is strongly recommended) | 13a      | For each group, the numbers of participants who were randomly assigned, received intended treatment, and were analyzed for the primary outcome                                              |                      |
|                                                      | 13b      | For each group, losses and exclusions after randomization, together with reasons                                                                                                            |                      |
| Recruitment                                          | 14a      | Dates defining the periods of recruitment and follow-up                                                                                                                                     |                      |
|                                                      | 14b      | Why the trial ended or was stopped                                                                                                                                                          |                      |
| Baseline data                                        | 15       | A table showing baseline demographic and clinical characteristics for each group                                                                                                            |                      |
| Numbers analyzed                                     | 16       | For each group, number of participants (denominator) included in each analysis and whether the analysis was by original assigned groups                                                     |                      |
| Outcomes and estimation                              | 17a      | For each primary and secondary outcome, results for each group, and the estimated effect size and its precision (such as 95% confidence interval)                                           |                      |
|                                                      | 17b      | For binary outcomes, presentation of both absolute and relative effect sizes is recommended                                                                                                 |                      |
| Ancillary analyses                                   | 18       | Results of any other analyses performed, including subgroup analyses and adjusted analyses, distinguishing prespecified from exploratory                                                    |                      |
| Harms                                                | 19       | All important harms or unintended effects in each group (for specific guidance see CONSORT for harms)                                                                                       |                      |
| <b>Comment</b>                                       |          |                                                                                                                                                                                             |                      |
| Limitations                                          | 20       | Trial limitations, addressing sources of potential bias, imprecision, and, if relevant, multiplicity of analyses                                                                            |                      |
| Generalizability                                     | 21       | Generalizability (external validity, applicability) of the trial findings                                                                                                                   |                      |
| Interpretation                                       | 22       | Interpretation consistent with results, balancing benefits and harms, and considering other relevant evidence                                                                               |                      |
| <b>Other information</b>                             |          |                                                                                                                                                                                             |                      |
| Registration                                         | 23       | Registration number and name of trial registry                                                                                                                                              |                      |
| Protocol                                             | 24       | Where the full trial protocol can be accessed, if available                                                                                                                                 |                      |
| Funding                                              | 25       | Sources of funding and other support (such as supply of drugs), role of funders                                                                                                             |                      |

<sup>a</sup>We strongly recommend reading this statement in conjunction with the CONSORT 2010 Explanation and Elaboration for important clarifications on all the items. If relevant, we also recommend reading CONSORT extensions for cluster randomized trials, noninferiority and equivalence trials, nonpharmacological treatments, herbal interventions, and pragmatic trials. Additional extensions are forthcoming: for those and for up-to-date references relevant to this checklist, see <http://www.consort-statement.org>.



|                |  | Time since discharge, months |     |    |    |    |    |    |    |    |    |    |    |    |    |
|----------------|--|------------------------------|-----|----|----|----|----|----|----|----|----|----|----|----|----|
| Number at risk |  | 0                            | 3   | 6  | 9  | 12 | 15 | 18 | 21 | 24 | 27 | 30 | 33 | 36 | 39 |
| Intervention   |  | 193                          | 115 | 97 | 82 | 68 | 53 | 49 | 42 | 37 | 31 | 26 | 15 | 10 | 2  |
| Control        |  | 193                          | 107 | 80 | 69 | 54 | 42 | 40 | 34 | 23 | 13 | 11 | 5  | 3  | 1  |



# BMJ Open

## Effect of medicines management versus standard care on readmissions in multimorbid patients: A randomized controlled trial

|                                 |                                                                                                                                                                                                                                                                                                                                                                                                                                                                                                                                                                                                                                                                                                                                                                                                                                                                                                          |
|---------------------------------|----------------------------------------------------------------------------------------------------------------------------------------------------------------------------------------------------------------------------------------------------------------------------------------------------------------------------------------------------------------------------------------------------------------------------------------------------------------------------------------------------------------------------------------------------------------------------------------------------------------------------------------------------------------------------------------------------------------------------------------------------------------------------------------------------------------------------------------------------------------------------------------------------------|
| Journal:                        | <i>BMJ Open</i>                                                                                                                                                                                                                                                                                                                                                                                                                                                                                                                                                                                                                                                                                                                                                                                                                                                                                          |
| Manuscript ID                   | bmjopen-2020-041558.R2                                                                                                                                                                                                                                                                                                                                                                                                                                                                                                                                                                                                                                                                                                                                                                                                                                                                                   |
| Article Type:                   | Original research                                                                                                                                                                                                                                                                                                                                                                                                                                                                                                                                                                                                                                                                                                                                                                                                                                                                                        |
| Date Submitted by the Author:   | 23-Nov-2020                                                                                                                                                                                                                                                                                                                                                                                                                                                                                                                                                                                                                                                                                                                                                                                                                                                                                              |
| Complete List of Authors:       | Lea, Marianne; Hospital Pharmacy Enterprise, Department of Pharmaceutical Services, Oslo Hospital Pharmacy<br>Mowe, Morten; Oslo University Hospital, General Internal Medicine Ward, the Medical Clinic; University of Oslo Faculty of Medicine<br>Molden, Espen; University of Oslo, Department of Pharmacy, Section for Pharmacology and Pharmaceutical Biosciences; Diakonhjemmet Hospital, Center for Psychopharmacology<br>Kvernørød, Kristin; Hospital Pharmacy Enterprise, Department of Pharmaceutical Services, Oslo Hospital Pharmacy<br>Skovlund, Eva; Norwegian University of Science and Technology, Department of Public Health and Nursing, Faculty of Medicine and Health Sciences<br>Mathiesen, Liv ; Universitetet i Oslo Det Matematisk-naturvitenskapelige Fakultet, Department of Pharmacy, Section for Pharmacology and Pharmaceutical Biosciences,; Hospital Pharmacy Enterprise |
| <b>Primary Subject Heading</b>: | Health services research                                                                                                                                                                                                                                                                                                                                                                                                                                                                                                                                                                                                                                                                                                                                                                                                                                                                                 |
| Secondary Subject Heading:      | Medical management, Pharmacology and therapeutics, Public health                                                                                                                                                                                                                                                                                                                                                                                                                                                                                                                                                                                                                                                                                                                                                                                                                                         |
| Keywords:                       | Quality in health care < HEALTH SERVICES ADMINISTRATION & MANAGEMENT, INTERNAL MEDICINE, PUBLIC HEALTH, THERAPEUTICS, CLINICAL PHARMACOLOGY                                                                                                                                                                                                                                                                                                                                                                                                                                                                                                                                                                                                                                                                                                                                                              |
|                                 |                                                                                                                                                                                                                                                                                                                                                                                                                                                                                                                                                                                                                                                                                                                                                                                                                                                                                                          |

SCHOLARONE™  
Manuscripts



I, the Submitting Author has the right to grant and does grant on behalf of all authors of the Work (as defined in the below author licence), an exclusive licence and/or a non-exclusive licence for contributions from authors who are: i) UK Crown employees; ii) where BMJ has agreed a CC-BY licence shall apply, and/or iii) in accordance with the terms applicable for US Federal Government officers or employees acting as part of their official duties; on a worldwide, perpetual, irrevocable, royalty-free basis to BMJ Publishing Group Ltd ("BMJ") its licensees and where the relevant Journal is co-owned by BMJ to the co-owners of the Journal, to publish the Work in this journal and any other BMJ products and to exploit all rights, as set out in our [licence](#).

The Submitting Author accepts and understands that any supply made under these terms is made by BMJ to the Submitting Author unless you are acting as an employee on behalf of your employer or a postgraduate student of an affiliated institution which is paying any applicable article publishing charge ("APC") for Open Access articles. Where the Submitting Author wishes to make the Work available on an Open Access basis (and intends to pay the relevant APC), the terms of reuse of such Open Access shall be governed by a Creative Commons licence – details of these licences and which [Creative Commons](#) licence will apply to this Work are set out in our licence referred to above.

Other than as permitted in any relevant BMJ Author's Self Archiving Policies, I confirm this Work has not been accepted for publication elsewhere, is not being considered for publication elsewhere and does not duplicate material already published. I confirm all authors consent to publication of this Work and authorise the granting of this licence.

1  
2  
3  
4 1 **TITLE PAGE**  
5  
6 2

7  
8 3 **TITLE**  
9

10 4 Effect of medicines management versus standard care on readmissions in  
11 5 multimorbid patients: A randomized controlled trial  
12  
13 6  
14  
15 7  
16  
17 8

18  
19 9 **AUTHORS**  
20

21 10 Marianne Lea\* (PhD)<sup>1</sup>, Morten Mowe (PhD)<sup>2,3</sup>, Espen Molden (PhD)<sup>4,5</sup>, Kristin Kvernørød (MSc)<sup>1</sup>, Eva  
22 11 Skovlund (PhD)<sup>6</sup> and Liv Mathiesen (PhD)<sup>5,7</sup>  
23

24 12 <sup>1</sup> Department of Pharmaceutical Services, Oslo Hospital Pharmacy, Hospital Pharmacies Enterprise,  
25 13 South Eastern Norway, Oslo, Norway

26  
27 14 <sup>2</sup> General Internal Medicine Ward, the Medical Clinic, Oslo University Hospital, Oslo, Norway

28  
29 15 <sup>3</sup> Faculty of Medicine, University of Oslo, Oslo, Norway

30  
31 16 <sup>4</sup> Center for Psychopharmacology, Diakonhjemmet Hospital, Oslo, Norway

32  
33 17 <sup>5</sup> Department of Pharmacy, Section for Pharmacology and Pharmaceutical Biosciences, University of  
34 18 Oslo, Oslo, Norway

35  
36 19 <sup>6</sup> Department of Public Health and Nursing, Faculty of Medicine and Health Sciences, Norwegian  
37 20 University of Science and Technology, NTNU, Trondheim, Norway

38  
39 21 <sup>7</sup> Hospital Pharmacies Enterprise, South Eastern Norway, Oslo, Norway  
40

41 22

42  
43 23 \*Corresponding author

44 24 *Address:* Department of Pharmaceutical Services, Oslo Hospital Pharmacy, Kirkeveien 166, 0450 Oslo,  
45 25 Norway

46  
47 26 *Phone:* + 47- 23 20 52 94

48  
49 27 E-mail: [marianne.lea@sykehusapotekene.no](mailto:marianne.lea@sykehusapotekene.no)  
50

51 28

52  
53 29

54  
55 30 **WORD COUNT:** 3785  
56

57 31

58  
59 32 **CATEGORY:** Original research  
60

1  
2  
3 **33 ABSTRACT**

4  
5 **34 Objective:** To investigate the effect of pharmacist-led medicines management in  
6  
7  
8 **35** multimorbid, hospitalized patients on long-term hospital readmissions and survival.

9  
10  
11 **36 Design:** Parallel-group, randomized controlled trial.

12  
13  
14 **37 Setting:** Recruitment from an internal medicine hospital ward in Oslo, Norway. Patients were  
15  
16 **38** enrolled consecutively from August 2014 until the predetermined target number of 400  
17  
18 **39** patients. The last participant was enrolled March 2016. Follow-up until December 31, 2017,  
19  
20 **40** i.e. 21-40 months.

21  
22  
23  
24 **41 Participants:** Acutely admitted multimorbid patients  $\geq 18$  years, using minimum four regular  
25  
26 **42** drugs from minimum two therapeutic classes. 399 patients were randomly assigned, 1:1, to  
27  
28 **43** the intervention or control group. After excluding 11 patients dying in-hospital and 2  
29  
30 **44** erroneously included, the primary analysis comprised 386 patients (193 in each group) with  
31  
32 **45** median age 79 years (range 23-96) and number of diseases 7 (range 2-17).

33  
34  
35  
36  
37 **46 Intervention:** Intervention patients received pharmacist-led medicines management  
38  
39 **47** comprising medicines reconciliation at admission, repeated medicines reviews throughout  
40  
41 **48** the stay and medicines reconciliation and tailored information at discharge, according to the  
42  
43 **49** Integrated Medicines Management (IMM) model. Control patients received standard care.

44  
45  
46  
47 **50 Primary and secondary outcome measures:** The primary endpoint was difference in time to  
48  
49 **51** readmission or death within 12 months. Overall survival was a priori the clinically most  
50  
51 **52** important secondary endpoint.

52  
53  
54 **53 Results:** Pharmacist-led medicines management had no significant effect on the primary  
55  
56 **54** endpoint time to readmission or death within 12 months (median 116 versus 184 days, HR

1  
2  
3 55 0.82, 95% CI 0.64 to 1.04, p=0.106). A statistically significantly increased overall survival was  
4  
5  
6 56 observed during 21-40 months follow-up (HR 0.66, 95% CI 0.48 to 0.90, p=0.008).  
7

8  
9 57 **Conclusions:** Pharmacist-led medicines management had no statistically significant effect on  
10  
11 58 time until readmission or death. A statistically significant increased overall survival was seen.  
12  
13 59 Further studies should be conducted to investigate the effect of such an intervention on a  
14  
15  
16 60 larger scale.  
17

18  
19 61 **Trial Registration:** ClinicalTrials.gov-Identifier:NCT02336113, closed for new participants.  
20  
21

22 62  
23

24  
25 63  
26

27  
28 64  
29

## 30 31 65 **ARTICLE SUMMARY** 32

### 33 34 66 **Strengths and limitations of this study** 35

- 36  
37  
38 67 • Randomized controlled design, blinded in the steps possible to blind  
39  
40 68 • Included almost 200 high-risk multimorbid patients in each group and followed them  
41  
42  
43 69 for 20-41 months  
44  
45 70 • Hard endpoints, readmissions and mortality, collected from national registers  
46  
47  
48 71 • Inclusion from a single hospital in Norway  
49  
50 72 • Spill-over effect may have reduced the effect estimate  
51  
52

53 73  
54

55  
56 74 **KEYWORDS:** multimorbid patients, integrated medicines management, pharmacist-led,  
57  
58 75 internal medicine, hospital readmissions, survival  
59  
60

## 76 INTRODUCTION

77 Increased life expectancy and steadily improving healthcare contribute to a growing  
78 subpopulation of multimorbid patients, commonly defined as having a minimum of two  
79 conditions.[1-3] The prevalence of multimorbidity is reported to be 20-30% in the general  
80 population, 55-98% in the elderly and 22-65% in hospitalized patients.[4-6] Multimorbidity is  
81 associated with the use of multiple drugs, increased use of healthcare services and reduced  
82 life expectancy.[3, 7-9] The organization of healthcare services and treatment guidelines is  
83 however mainly focused on single diagnoses, while coexisting diagnoses or use of multiple  
84 drugs are rarely taken into account.[10, 11] Studying the care of multimorbid patients is  
85 crucial to managing the future global challenge of ensuring safe, effective and evidence-  
86 based care to these patients.[1, 11, 12]

87 Multimorbid patients using numerous drugs are at high risk of harm by drug-related  
88 problems (DRPs).[13, 14] DRPs are reported to cause 10-30% of all hospital admissions,  
89 whereof a high proportion is preventable.[15-17] Drugs also cause problems during the  
90 hospital stay[18, 19], which pose a risk of readmissions.[20, 21] A recent Cochrane review  
91 found no evidence that medicines reviews reduce hospital readmissions or mortality.[22]  
92 The authors state that important effects may have been overlooked due to short follow-up  
93 in included studies, and request high-quality studies with long follow-up in high-risk patient  
94 populations.[22]

95 The Integrated Medicines Management (IMM) model has been established as a tool for  
96 clinical pharmacists to optimize and individualize drug therapy.[23] IMM comprises a  
97 systematic approach to ensure high quality of the use of drugs throughout the hospital stay,  
98 comprising a three-step procedure, i.e. medicines reconciliation at admission, medicines

1  
2  
3 99 reviews during the stay and medicines reconciliation and -information at discharge.[23-27]  
4  
5  
6 100 Nevertheless, only a very limited number of clinical pharmacists are working in Norwegian  
7  
8 101 hospitals, hence standard care for hospitalized patients does not include IMM or other  
9  
10 102 services by clinical pharmacists. Several studies have investigated the effect of implementing  
11  
12 103 either parts of, or the complete IMM model on different efficacy measures[23-25, 28], but to  
13  
14 104 our knowledge, not in multimorbid patients. The objective of the present study was to  
15  
16 105 investigate the effect of pharmacist-led medicines management in multimorbid, hospitalized  
17  
18 106 patients on long-term hospital readmissions and survival.  
19  
20  
21  
22

## 23 107 **MATERIALS AND METHODS**

### 24 25 26 108 **Study Design**

27  
28  
29  
30 109 This parallel-group, randomized controlled trial, approved by the Regional Committee for  
31  
32 110 Medical and Health Research Ethics (2014/704/REK south-eastern D) and the Privacy  
33  
34 111 Ombudsman, was conducted at the internal medicine ward, Oslo University hospital  
35  
36 112 (Ullevaal), Norway. The ward comprised 24 beds and mainly received patients with multiple  
37  
38 113 medical issues, in particular hematological, endocrine, infectious and/or cardiovascular.  
39  
40 114 Patients were considered for inclusion Monday to Friday during regular daytime working  
41  
42 115 hours, from August 30, 2014, until the predetermined target number of 400 patients was  
43  
44 116 enrolled. Eligible patients were prospectively invited and enrolled in the study following  
45  
46 117 written informed consent. S1 Appendix shows the original trial protocol, protocol  
47  
48 118 amendments, the statistical analysis plan and the timeline of the study with the milestones.  
49  
50 119 S2 Appendix shows the CONSORT Checklist. Figure 1 gives a graphical depiction of the study  
51  
52 120 design, as suggested for studies of complex interventions.[29]  
53  
54  
55  
56  
57  
58  
59  
60

1  
2  
3 121 The trial was registered in ClinicalTrials.gov, identifier: NCT02336113, in June 2014. Due to a  
4  
5 122 minor Protocol Registration and Results System (PRS) review comment, the trial was first  
6  
7  
8 123 published on their website in January 2015. A clarification that readmission data were to be  
9  
10 124 harvested from the Norwegian Patient Registry, was the only addition to the original  
11  
12  
13 125 registration. The trial is closed for new participants.  
14  
15

## 16 126 **Participants**

17  
18  
19 127 Inclusion criteria were: acute admission, age  $\geq 18$  years and use of at least four regular drugs  
20  
21 128 from minimum two therapy classes (Anatomical Therapeutic Chemical (ATC)[30] at 1st level)  
22  
23  
24 129 at admission. The latter was chosen as the preferred multimorbidity measure[31], as drug  
25  
26 130 counts were considered more reliable than disease counts in the acute hospital admission  
27  
28  
29 131 setting. Drugs were counted before medicines reconciliation. However, if the medicines  
30  
31 132 reconciliation revealed that this inclusion criterion was not fulfilled, the patient was  
32  
33  
34 133 excluded from the study. Exclusion criteria were i) terminally ill, ii) isolated due to severe  
35  
36 134 infections or iii) unable to communicate in Norwegian or English and no translator available.  
37  
38  
39 135 Patients readmitted during the study period were not invited for 'a second' inclusion.  
40

## 41 136 **Randomization and blinding**

42  
43  
44  
45 137 The patients were randomized 1:1 to the intervention or control group. Centre for  
46  
47 138 Biostatistics and Epidemiology, Oslo University Hospital, was responsible for the  
48  
49  
50 139 randomization procedure. Their staff had no contact with patients, study pharmacists or  
51  
52 140 ward staff. A random number generator program and a permuted block design were used to  
53  
54  
55 141 generate the randomization sequence, which was delivered to the study pharmacists in  
56  
57 142 sequentially numbered, opaque, sealed envelopes. The investigators were blinded to block  
58  
59 143 size, which was randomly varied. Randomization took place following patient inclusion and  
60



1  
2  
3 144 baseline assessments. A study pharmacist assigned the envelope with the lowest number to  
4  
5  
6 145 the individual participant and signed the allocation before the envelope was opened.  
7

8  
9 146 It was neither feasible to blind participants nor study pharmacists to the allocation. It was  
10  
11 147 also known by ward staff which of the patients belonged to the intervention group. Ward  
12  
13 148 staff was, however, unable to distinguish between patients randomized to the control group  
14  
15  
16 149 and patients not participating in the trial. The primary endpoint analysis was conducted on a  
17  
18 150 blinded dataset (by researchers who did not see patients). The staff from the Norwegian  
19  
20  
21 151 Patient Registry and the Norwegian Cause of Death Registry providing outcome data were  
22  
23 152 not involved in data collection or preparation of data files and were blinded to group  
24  
25  
26 153 allocation.  
27

#### 28 29 154 **Data collection and baseline assessments**

30  
31  
32 155 During the inclusion period, six clinical pharmacists, all with a master`s degree in clinical  
33  
34 156 pharmacy and standardized training in IMM, collected data, conducted baseline assessments  
35  
36  
37 157 and provided the various steps of the intervention. All steps were standardized using  
38  
39 158 translated IMM procedures adapted to the Norwegian hospital setting.[23-27, 32] A DRP was  
40  
41  
42 159 defined according to the Pharmaceutical Care Network Europe (PCNE) as *“an event or*  
43  
44 160 *circumstance involving drug therapy that actually or potentially interferes with desired*  
45  
46 161 *health outcomes”*.[33]  
47

48  
49  
50 162 Blood samples were collected for biochemical analyses. Glomerular filtration rate (GFR) was  
51  
52 163 calculated using the Cockcroft-Gault formula[34], except for obese patients (body-mass  
53  
54 164 index > 30), for whom the Salazar-Corcoran formula was used.[35] An experienced senior  
55  
56  
57 165 physician retrospectively collected information from medical records to calculate the  
58  
59 166 Charlson Comorbidity Index (CCI) score.[36]  
60

1  
2  
3 167 Before allocation, baseline assessments were conducted for all included patients, comprising  
4  
5 168 medicines reconciliation and review. The purpose of these baseline assessments was to  
6  
7 169 assess the prevalence of DRPs and drug-related hospitalizations [37]. These medicines  
8  
9 170 reviews included only drugs used before admission, not drugs initiated during transport, or  
10  
11 171 following hospital admission. The pharmacists had access to the patient's medical history  
12  
13 172 and laboratory results up to and including admission time. Importantly though, medicines  
14  
15 173 discrepancies, i.e. mismatches between the reconciled drug list and the list recorded at  
16  
17 174 hospital admission, and DRPs revealed during these baseline assessments were neither  
18  
19 175 discussed in the multidisciplinary treatment team, nor documented in the patient record.  
20  
21 176 Before allocation, the study pharmacist assessed whether any medicines discrepancy or DRP  
22  
23 177 could result in irreversible detrimental effects or death if not handled immediately. If the  
24  
25 178 patient was allocated to the control group, any such issue was discussed with a senior  
26  
27 179 physician (MM) who decided whether it was necessary to intervene.  
28  
29  
30  
31  
32  
33  
34

### 35 180 **The intervention group – in-hospital pharmacist-led medicines management**

36  
37  
38 181 The thorough intervention implied the inclusion of clinical pharmacist(s) in the patients`  
39  
40 182 multidisciplinary treatment team throughout the hospital stay, working in close  
41  
42 183 collaboration with the patient, physicians and other members of the team, as shown in  
43  
44 184 Figure 1. The medicines management process can be divided into three parts covering the  
45  
46 185 patients` hospital stay; medicines reconciliation at admission, medicines review repeatedly  
47  
48 186 during the entire stay and medicines reconciliation and tailored information at  
49  
50 187 discharge.[23-27] Medicines reviews were performed at admission and repeatedly as  
51  
52 188 needed due to changes in either prescription, patient symptoms, clinical state, and/or  
53  
54  
55  
56  
57  
58  
59  
60

1  
2  
3 189 laboratory values. Patients were reviewed for such changes daily, Monday to Friday, during  
4  
5  
6 190 regular daytime working hours.  
7  
8 191 During medicines reviews, a list of pre-defined risk categories, all described in detail in Table  
9  
10 192 1, were systematically addressed for each drug in each patient. Furthermore, an overall  
11  
12  
13 193 benefit-risk assessment was made with the main goal of tailoring drug therapy to the  
14  
15 194 individual participant, giving significant weight to the patient perspective. Medicines  
16  
17  
18 195 discrepancies and DRPs revealed during both baseline assessments and the hospital stay  
19  
20 196 were discussed in the multidisciplinary treatment team. At discharge, a medicines  
21  
22  
23 197 reconciliation was conducted, followed by written and oral information tailored to the  
24  
25 198 patient's further needs of care, provided to the patient and/or next care provider, see Figure  
26  
27  
28 199 1. The main goals of this step were to answer drug questions, to ensure continuous  
29  
30 200 treatment, to increase adherence, and to provide the patient and/or next care provider a  
31  
32 201 complete overview of all drugs.  
33  
34  
35  
36  
37  
38  
39  
40  
41  
42  
43  
44  
45  
46  
47  
48  
49  
50  
51  
52  
53  
54  
55  
56  
57  
58  
59  
60

**Table 1.** Detailed description of the risk categories that were systematically addressed for each drug in each patient during the medicines reviews, and examples of sources used by clinical pharmacists to address them.

| Risk category                             | Detailed description                                                                                                              | Examples of sources                                                                                                                                                                                                                                                                                                                                                                                                                                                       |
|-------------------------------------------|-----------------------------------------------------------------------------------------------------------------------------------|---------------------------------------------------------------------------------------------------------------------------------------------------------------------------------------------------------------------------------------------------------------------------------------------------------------------------------------------------------------------------------------------------------------------------------------------------------------------------|
| Drug monitoring                           | Need for therapeutic drug monitoring or laboratory monitoring, e.g. digoxin, warfarin, antiepileptics                             | <ul style="list-style-type: none"> <li>The Pharmacology Portal – Norwegian portal for drug and intoxicant analyses - <a href="http://www.farmakologiportalen.no/">http://www.farmakologiportalen.no/</a></li> <li>Norwegian National Centre for Epilepsy</li> <li>Centre for Psychopharmacology, Diakonhjemmet Hospital, Norway</li> </ul>                                                                                                                                |
| Adverse effect                            | Presence of symptoms or changes in laboratory values possibly caused by drug(s)                                                   | <ul style="list-style-type: none"> <li>Summary of Product Characteristics (SPC)</li> <li>UpToDate</li> <li>Micromedex</li> <li>CredibleMeds, QTDrugs List, - <a href="https://crediblemeds.org/">https://crediblemeds.org/</a></li> </ul>                                                                                                                                                                                                                                 |
| Drug-drug interaction                     | Clinically relevant drug-drug interactions                                                                                        | <ul style="list-style-type: none"> <li>The Norwegian Medicines Agency – Drug interactions checker</li> <li>Micromedex – Drug interactions</li> <li>Drugs.com – Drug interactions checker</li> </ul>                                                                                                                                                                                                                                                                       |
| Non-optimal drug therapy                  | Lack of drug treatment or non-optimal drug treatment of a symptom/disease                                                         | <ul style="list-style-type: none"> <li>Therapy guidelines</li> <li>BMJ Best Practice</li> <li>UpToDate</li> <li>Summary of Product Characteristics (SPC)</li> </ul>                                                                                                                                                                                                                                                                                                       |
| Reduced organ function / contraindication | Drug or dosage of drug inappropriate due to reduced kidney function, reduced liver function, contraindications or other diseases. | <ul style="list-style-type: none"> <li>The Renal Drug Handbook - <a href="https://renaldrugdatabase.com/">https://renaldrugdatabase.com/</a></li> <li>UpToDate</li> <li>Micromedex</li> <li>Internetmedicin <a href="https://www.internetmedicin.se/searchresult.aspx?search=lever">https://www.internetmedicin.se/searchresult.aspx?search=lever</a> (reduced liver function/drugs that can harm the liver)</li> <li>Summary of Product Characteristics (SPC)</li> </ul> |
| Inappropriate drug in elderly             | Use of less favourable drug in patients over 65 years old, e.g. anticholinergics                                                  | <ul style="list-style-type: none"> <li>STOPP 2 (Screening Tool of Older Persons' Prescriptions)</li> <li>Beers criteria</li> </ul>                                                                                                                                                                                                                                                                                                                                        |
| Unnecessary drug                          | Drug in use is not indicated                                                                                                      | <ul style="list-style-type: none"> <li>Therapy guidelines</li> <li>Summary of Product Characteristics (SPC)</li> <li>UpToDate</li> </ul>                                                                                                                                                                                                                                                                                                                                  |
| Course length                             | Consideration of appropriate duration of course length, e.g. duration of antibiotics                                              | <ul style="list-style-type: none"> <li>Summary of Product Characteristics (SPC)</li> <li>The Norwegian Directorate of Health – National guideline for the use of antibiotics in hospitals</li> <li>The European Committee on Antimicrobial Susceptibility Testing - EUCAST - minimum inhibitory concentrations</li> </ul>                                                                                                                                                 |
| Practical problem                         | Practical challenges in drug handling, e.g. inhalation devices                                                                    | <ul style="list-style-type: none"> <li>Summary of Product Characteristics (SPC)</li> <li>Local procedure for tablets and capsules - dividing, opening and crushing</li> <li>Handbook of Drug Administration via Enteral Feeding Tubes - <a href="https://about.medicinescomplete.com/publication/drug-administration-via-enteral-feeding-tubes/">https://about.medicinescomplete.com/publication/drug-administration-via-enteral-feeding-tubes/</a></li> </ul>            |
| Adherence issue                           | Patient does not, intentionally or unintentionally, use / take drug as agreed                                                     | <ul style="list-style-type: none"> <li>Quick guide inhalators - <a href="https://sykehusapoteket.no/Documents/Inhalasjonsmedisin%20for%20sykehusleger.pdf">https://sykehusapoteket.no/Documents/Inhalasjonsmedisin%20for%20sykehusleger.pdf</a></li> <li>Videos – use of inhalators - <a href="https://www.felleskatalogen.no/medisin/bruk-av-inhalatorer/aerochamber">https://www.felleskatalogen.no/medisin/bruk-av-inhalatorer/aerochamber</a></li> </ul>              |
| Other                                     | Problem not applicable in other subgroups, e.g. prescription errors, documentation errors                                         | <ul style="list-style-type: none"> <li>The patient's medical record</li> </ul>                                                                                                                                                                                                                                                                                                                                                                                            |

205

1  
2  
3 206 **The control group - standard care**  
4  
5

6 207 The control group received standard care, see Figure 1, which in line with standard  
7  
8 208 procedures in Norwegian hospitals included neither medicines reconciliation nor medicines  
9  
10 209 reviews or any other service from clinical pharmacists. Medicines discrepancies and DRPs  
11  
12 210 revealed during baseline assessments in control patients were only registered in the  
13  
14 211 research database, and not discussed in the multidisciplinary treatment team.  
15  
16  
17  
18

19 212 **Endpoints**  
20

21 213 The primary endpoint was time to first hospital readmission or death within 12 months after  
22  
23 214 discharge.  
24  
25

26 215 Secondary endpoints:  
27  
28

- 29  
30 216 • Overall survival  
31  
32 217 • Number of unplanned hospitalizations per patient within 12 months after  
33  
34 218 discharge  
35  
36  
37 219 • Proportion of patients:  
38  
39 220 ○ with unplanned hospitalizations within 30 days, 6 months and 12 months  
40  
41 221 after discharge  
42  
43 222 ○ who died within 30 days, 6 months, 12 months and 20 months after  
44  
45 223 discharge  
46  
47 224 ○ who died or had unplanned hospitalizations within 30 days, 6 months and  
48  
49 225 12 months after discharge  
50  
51  
52 226 • Length of stay (LOS) of first hospital readmission  
53  
54 227 • Time to the first unplanned readmission within 12 months after discharge,  
55  
56 228 censored for deaths  
57  
58  
59  
60

1  
2  
3 229 In the original trial protocol, included in S1 Appendix, the *difference between the control and*  
4  
5 230 *intervention group in time to the first readmission* was defined as the primary endpoint  
6  
7  
8 231 without further specification. As death is a competing risk to readmissions, it was considered  
9  
10 232 appropriate to use the *difference in time to readmission or death* as the primary endpoint.  
11  
12  
13 233 This was clarified in the statistical analysis plan, which was finalized and signed before  
14  
15 234 outcome data files were available.

16  
17  
18 235 Data on readmissions were provided by the Norwegian Patient Registry and data on  
19  
20  
21 236 mortality by the Norwegian Cause of Death Registry. We had originally planned a follow-up  
22  
23 237 of 12 months. However, as both the inclusion period and the retrieval of outcome data took  
24  
25  
26 238 longer than planned, we decided to extend the follow-up of all patients to December 31,  
27  
28 239 2017, to increase statistical power. This amendment was described in the statistical analysis  
29  
30 240 plan, which was finalized and signed before any outcome data files were available. Because  
31  
32  
33 241 the inclusion period lasted approximately 1.5 years, the follow up of each individual patient  
34  
35 242 was in the range 21 – 40 months.

36  
37  
38 243 The primary efficacy analysis was a modified intention to treat-analysis excluding patients  
39  
40 244 who died during the index hospital stay as they were never at risk for readmission, as well as  
41  
42  
43 245 erroneously included patients. The analysis population was defined before outcome data  
44  
45  
46 246 files were received.

#### 47 48 49 247 **Sample size**

50  
51  
52 248 The sample size calculation was based on an expected 12-month readmission frequency of  
53  
54 249 50%.[23] It was estimated that to detect a 15% absolute reduction in hospital readmissions  
55  
56  
57 250 with 80% power and a significance level of 5%, we would need 168 patients in each group.  
58  
59 251 To compensate for any dropouts, it was decided to enroll 200 patients in each group. Sample  
60

1  
2  
3 252 size calculations based on proportions are generally considered reliable for survival analysis,  
4  
5  
6 253 but might in some instances overestimate the required sample size.[38] In other words:  
7  
8 254 since a survival analysis utilizes the information better than a comparison of proportions at a  
9  
10 255 given time, the power will be somewhat higher than estimated above.  
11  
12

### 13 256 **Statistics**

14  
15  
16 257 Time-to-event endpoints were compared between groups by the Kaplan Meier method and  
17  
18 258 the log-rank test. Cox's proportional hazards model was applied to estimate hazard ratios  
19  
20 259 (HRs), which are presented with 95% confidence intervals (CIs). The proportionality  
21  
22 260 assumption was checked by visual inspection of log(-log) plots. Continuous variables were  
23  
24 261 compared between the two groups using Mann-Whitney tests. In an additional sensitivity  
25  
26 262 analysis of time to readmission, which was not included in the statistical analysis plan, death  
27  
28 263 was treated as a competing risk using the Fine and Gray method [39].  
29  
30  
31  
32

33  
34 264 Statistical analyses were performed by IBM SPSS Software version 25.0 (IBM Corp. NY) and  
35  
36 265 STATA 16. P values < 0.05 were regarded as statistically significant.  
37  
38  
39

### 40 266 **Patient and Public Involvement**

41  
42  
43 267 During the planning of the study, patient representatives from the medical clinic participated  
44  
45 268 in the preparation of the patient information leaflet and provided input on the study design,  
46  
47 269 e.g. the choice of the primary endpoint.  
48  
49  
50

### 51 270 **RESULTS**

52  
53  
54 271 During the study period, August 30, 2014, to March 17, 2016, 2174 patients were admitted  
55  
56 272 to the internal medicine ward and 1769 (81%) were assessed for eligibility. Figure 2 shows  
57  
58 273 the patient flow. Among the 598 patients invited to participate, 175 (29%) declined  
59  
60

1  
2  
3 274 (permission to register reasons for declining not obtained). 399 patients were randomized,  
4  
5  
6 275 200 to the intervention group and 199 to the control group. Following randomization, 11  
7  
8 276 patients (5 intervention and 6 control) who died during the hospital stay and 2 patients  
9  
10 277 (both intervention) who were erroneously included, were excluded from the analyses. Thus,  
11  
12 278 the analysis population for all endpoints comprised 193 patients in each group, all followed-  
13  
14  
15 279 up until December 31, 2017, i.e. for a minimum of 21 months and a maximum of 40 months.  
16  
17  
18 280 The median age in the analysis population was 79 years (range 23-96), 356 (92%) were  
19  
20 281 home-dwelling before hospitalization and 213 (55%) were women. The median number of  
21  
22 282 regular drugs at hospital admission was 8 (range 4-19). The median number of diseases was  
23  
24  
25 283 7 (range 2-17) and the median CCI score was 3 (range 0-12). The median number of DRPs per  
26  
27  
28 284 patient identified during baseline assessments was 13 (range 3-42). The baseline  
29  
30 285 characteristics of the patients in the control versus the intervention group are presented in  
31  
32  
33 286 Table 2. No differences of importance were observed between the groups.  
34  
35  
36  
37  
38  
39  
40  
41  
42  
43  
44  
45  
46  
47  
48  
49  
50  
51  
52  
53  
54  
55  
56  
57  
58  
59  
60



Table 2. Characteristics of patients in the analysis population.

| Characteristic                                                 | Control<br>(n=193) | Intervention<br>(n=193) |
|----------------------------------------------------------------|--------------------|-------------------------|
| Women                                                          | 106 (55%)          | 102 (53%)               |
| Age                                                            | 80.7 (23.1-96.4)   | 78.0 (25.7-95.6)        |
| Number of unplanned hospitalizations last 6 months             | 1 (0-6)            | 0 (0-11)                |
| Charlson Comorbidity Index score                               | 3 (0-12)           | 2 (0-11)                |
| Most frequent medical history:                                 |                    |                         |
| • Hypertension                                                 | 91 (47%)           | 108 (56%)               |
| • Endocrine and metabolic diseases                             | 77 (40%)           | 80 (42%)                |
| • Kidney disease                                               | 63 (33%)           | 73 (38%)                |
| • Congestive heart failure                                     | 81 (42%)           | 68 (35%)                |
| • Arrhythmia                                                   | 72 (37%)           | 71 (37%)                |
| Body-mass index <sup>a</sup>                                   | 24.4 (14.4-48.4)   | 25.0 (13.1-43.3)        |
| Laboratory results:                                            |                    |                         |
| • Glomerular filtration rate (ml/min)                          | 49 (8-235)         | 52 (9-229)              |
| • Serum-albumin (g/L) <sup>b</sup>                             | 38 (24-51)         | 38 (22-56)              |
| • C-reactive protein (nmol/L)                                  | 133 (0-3419)       | 152 (0-5248)            |
| Number of prescribed drugs <sup>c</sup> at hospital admission: |                    |                         |
| • Regular                                                      | 8 (4-19)           | 8 (4-19)                |
| • On demand                                                    | 2 (0-10)           | 2 (0-11)                |
| Assistance with drug administration before hospitalization:    |                    |                         |
| • Multidose                                                    | 51 (26%)           | 46 (24%)                |
| • Home nurse                                                   | 33 (17%)           | 28 (15%)                |
| • Nursing home                                                 | 15 (8%)            | 15 (8%)                 |
| • Relative                                                     | 13 (7%)            | 14 (7%)                 |
| Home-dwelling before hospitalization                           | 178 (92%)          | 178 (92%)               |
| Number of drug-related problems                                | 13 (3-31)          | 13 (3-42)               |
| Length of index hospital stay, number of days                  | 8 (2-57)           | 7 (1-66)                |
| Total number of prescribed drugs at hospital discharge         | 11 (3-24)          | 11 (3-23)               |
| Discharged to home                                             | 124 (64%)          | 129 (67%)               |
| Assistance with drug administration after discharge:           |                    |                         |
| • Multidose                                                    | 28 (15%)           | 26 (14%)                |
| • Home nurse                                                   | 32 (17%)           | 21 (11%)                |
| • Nursing home                                                 | 51 (26%)           | 51 (26%)                |
| • Relative                                                     | 7 (4%)             | 11 (6%)                 |
| • Other institution/hospital ward                              | 18 (9%)            | 13 (7%)                 |

Data are n (%) or median (range).

<sup>a</sup> Body-mass index was registered for 144/193 control patients and 148/193 intervention patients.

<sup>b</sup> Serum-albumin was registered for 181/193 control patients and 187/193 intervention patients.

<sup>c</sup> After medicines reconciliation

1  
2  
3 288 In the group receiving pharmacist-led medicines management, a total of 3826 DRPs were  
4  
5 289 revealed at hospital admission and during the hospital stay. Type of DRPs revealed and  
6  
7  
8 290 presented for discussion in the multidisciplinary team and the respective acceptance rates  
9  
10 291 will be presented in a separate publication. In overall numbers, 1100 of the 3826 identified  
11  
12 292 DRPs (29 %) were solved without the need for discussion in the multidisciplinary treatment  
13  
14  
15 293 team, while 1075 (28%) were not prioritized for discussion, i.e. considered of low  
16  
17  
18 294 importance compared to other DRPs or the patients` clinical state. The remaining 1651 (43  
19  
20 295 %) DRPs were discussed in the multidisciplinary team, whereof 1022 (62 %) led to immediate  
21  
22 296 changes in the individual patient`s drug treatment. In 6 of the 193 control patients (1.5 %)  
23  
24  
25 297 severe medicines discrepancies or DRPs that had to be intervened on were revealed during  
26  
27  
28 298 baseline assessments.

29  
30 299 Figure 3a shows time to first readmission or death in the two groups. The median time to  
31  
32 300 readmission or death was 184 days in the intervention group and 116 days in the control  
33  
34 301 group, but the difference was not statistically significant (HR 0.82, 95% CI 0.64 to 1.04,  
35  
36 302  $p=0.106$ ). Sensitivity analyses, extending follow-up until December 31, 2017, or excluding  
37  
38 303 control patients who were intervened on, did not influence the effect estimate (HR 0.84,  
39  
40 304 95% CI 0.68 to 1.05,  $p=0.118$  and HR 0.85, 95% CI 0.68 to 1.06,  $p=0.149$ , respectively). The  
41  
42 305 secondary endpoint analysis of time to first readmission, censoring for 20 deaths, gave a  
43  
44 306 similar effect estimate (HR 0.81, 95% CI 0.63-1.04,  $p=0.104$ ), shown in S3 Appendix. When  
45  
46 307 death was instead treated as a competing risk the subdistribution hazard ratio was SHR 0.83,  
47  
48 308 95%CI 0.64-1.06,  $p=0.137$ .

49  
50 309 There was a statistically significant difference in overall survival (HR 0.66, 95% CI 0.48 to  
51  
52 310 0.90,  $p=0.008$ ), as shown in Figure 3b. The results of other the secondary endpoint analyses  
53  
54  
55  
56  
57  
58  
59  
60

311 are shown in Table 3. Within 20 months after the index discharge, 27% of the intervention  
 312 patients had died versus 39% of the control patients.

313 Table 3. Secondary endpoint analyses.

| Endpoint                                                                                          | Intervention group (n=193) | Control group (n=193) | p value |
|---------------------------------------------------------------------------------------------------|----------------------------|-----------------------|---------|
| Number of unplanned hospitalizations per patient within 12 months after discharge, median (range) | 1 (0-13)                   | 1 (0-12)              | 0.212   |
| Length of hospital stay of first unplanned hospitalization, median number of days (range)         | 6 (1-58)                   | 6 (1-71)              | 0.576   |
| Number of patients unplanned hospitalized within                                                  |                            |                       |         |
| • 30 days after index discharge, n (%)                                                            | 37 (19)                    | 46 (24)               | 0.265   |
| • 6 months after index discharge, n (%)                                                           | 89 (46)                    | 103 (53)              | 0.154   |
| • 12 months after index discharge, n (%)                                                          | 115 (60)                   | 129 (67)              | 0.139   |
| Number of patients who died within                                                                |                            |                       |         |
| • 30 days after index discharge, n (%)                                                            | 4 (2)                      | 7 (4)                 | 0.359   |
| • 6 months after index discharge, n (%)                                                           | 24 (12)                    | 36 (19)               | 0.092   |
| • 12 months after index discharge, n (%)                                                          | 44 (23)                    | 56 (29)               | 0.163   |
| • 20 months after index discharge, n (%)                                                          | 52 (27)                    | 76 (39)               | 0.009   |
| Number of patients who died or was unplanned hospitalized within                                  |                            |                       |         |
| • 30 days after index discharge, n (%)                                                            | 41 (21)                    | 51 (26)               | 0.232   |
| • 6 months after index discharge, n (%)                                                           | 96 (50)                    | 113 (59)              | 0.082   |
| • 12 months after index discharge, n (%)                                                          | 125 (65)                   | 139 (72)              | 0.125   |

314

## 315 DISCUSSION

316 Pharmacist-led medicines management in multimorbid patients did not statistically  
 317 significantly prolong the time until first readmission or death compared to control patients.  
 318 The result is in contrast with previous randomized controlled trials (RCTs) on similar  
 319 interventions provided to other patient populations, showing a decreased readmission rate,  
 320 prolonged time to readmission, and a reduction in hospital visits.[23, 40-42] This contrast  
 321 may be explained by the patient population. To our knowledge, our study is the first to  
 322 investigate the effect of a medicines management intervention on clinically relevant  
 323 endpoints in multimorbid patients with complex drug regimens. In this population, urgent

1  
2  
3 324 medical care like hospital readmissions might be difficult to avoid. This theory is supported  
4  
5  
6 325 by a subgroup analysis of one of the previous RCTs, which found that in patients 80 years or  
7  
8 326 older a pharmacist intervention was more effective in preventing emergency department  
9  
10 327 visits in patients using less than 5 drugs compared to patients using 5 drugs or more.[28]  
11  
12  
13 328 However, it should be noted that the 95% confidence interval in our study is wide and  
14  
15 329 compatible with a risk reduction of 36% as well as a 4% increased risk. The sample size  
16  
17  
18 330 calculation in the current study was based on a target 15% reduction in readmissions, which  
19  
20 331 may have been optimistic, and insufficient power may therefore explain the non-significant  
21  
22  
23 332 result.

24  
25  
26 333 A statistically significantly increased overall survival, one of the secondary endpoints, was  
27  
28 334 seen in patients in the intervention versus the control group. The hazard reduction of 34% is  
29  
30  
31 335 indisputably clinically relevant and reflects a great improvement potential in the care of  
32  
33 336 multimorbid patients. To our knowledge, this is the first study to show an effect of  
34  
35  
36 337 pharmacist-led medicines management on survival. This endpoint was either not  
37  
38 338 investigated[23, 42], or no effect was seen[40, 41] in the previous RCTs. The results of our  
39  
40  
41 339 study are in contrast to the recent Cochrane review concluding that “medication review  
42  
43 340 does not seem to prevent death and hospital readmissions”. [22] The reason for this  
44  
45  
46 341 discrepancy is most likely multifactorial and due to differences in patient populations,  
47  
48 342 characteristics of the interventions, and the duration of the follow-up. Important differences  
49  
50 343 in the patient populations include older patients in the study by Gillespie et al.[40], and that  
51  
52  
53 344 the study by Ravn-Nielsen et al.[43] included patients with lower mortality than the current  
54  
55 345 study, i.e. mortality rates of 10% versus 19%, respectively, in the control group at 6 months  
56  
57  
58 346 after index discharge. In our study, a thorough intervention conducted close to the patient,  
59  
60 347 including medicines reconciliation both at admission and discharge as well as improved

1  
2  
3 348 information at discharge to ensure continuous treatment and increase adherence, may  
4  
5  
6 349 constitute characteristics of the intervention important for the effect on survival. Clinical  
7  
8 350 pharmacists performing the procedures of the intervention in close collaboration with the  
9  
10 351 patient, physician and other members of the treatment team are most likely also important  
11  
12  
13 352 for obtaining the effect on survival. At last, the longer follow-up in the present study,  
14  
15 353 prolonged by several months compared to the other RCTs[40, 43], could have allowed  
16  
17 354 prophylactic drugs added during medicine reviews enough time to achieve beneficial  
18  
19  
20 355 effects[22] and probably contributes to explain the intervention`s effect on survival.  
21  
22  
23 356 Heterogeneity in the pharmacist-led in-hospital interventions, including various elements of  
24  
25  
26 357 various intensity, make comparisons of results amongst studies, as well as interpretation of  
27  
28 358 results, challenging.[22, 44] Furthermore, such interventions are indisputably complex, and  
29  
30  
31 359 evaluating such interventions is complicated.[45, 46] The intervention consists of various  
32  
33 360 components delivered as an overall intervention. With such a design, it is not known  
34  
35  
36 361 whether the overall intervention or only parts of it are important for effect. The intervention  
37  
38 362 in the current study consisted of elements of the highest level of intensity, i.e. diamond level  
39  
40  
41 363 medicines reconciliation[44, 47] and advanced medicines reviews.[48] In the recent RCT  
42  
43 364 from Denmark, a similar intervention of similar intensity reduced emergency department  
44  
45 365 visits and hospital readmissions but did not have an effect on mortality[43], i.e. the opposite  
46  
47  
48 366 of our results. Differences in eligibility criteria, nuances in the delivered intervention and/or  
49  
50 367 care delivered to control patients, clinical pharmacists` training and how they interacted  
51  
52  
53 368 with the rest of the multidisciplinary treatment team may be factors contributing to explain  
54  
55 369 this. The current study nevertheless adds to the international body of literature that high-  
56  
57  
58 370 intensity, in-hospital pharmacist-led interventions to tailor drug therapy may improve clinical  
59  
60 371 outcomes in high-risk patients.

1  
2  
3 372 The intervention had no effect on the length of stay (LOS) of the first readmission. This was  
4  
5 373 not surprising, as hospitals in Norway for several years have received incentives to reduce  
6  
7 374 LOS, illustrated by as short as 6 days median LOS of the first readmission in the present  
8  
9 375 study. In comparison, an IMM-intervention showed a reduction from 13.1 days to 9.7 days  
10  
11 376 LOS of the first readmission in Northern Ireland.[23] The number of unplanned  
12  
13 377 hospitalizations during 12 months follow-up did not differ between the groups in the present  
14  
15 378 study, in line with findings by Gillespie et al.[40]  
16  
17  
18  
19  
20 379 Drug counts were chosen as the preferred multimorbidity measure at patient inclusion,  
21  
22 380 which could be seen as a limitation. Nonetheless, this strategy resulted in the inclusion of a  
23  
24 381 multimorbid patient population, as validated by diseases counts according to the generally  
25  
26 382 accepted definition.[3] Our study included patients from a single hospital in Norway which  
27  
28 383 may challenge the generalizability. However, the study had few exclusion criteria, thus  
29  
30 384 comprising a broad population. The low drop-out rate further contributes favourably to  
31  
32 385 external validity.  
33  
34  
35  
36  
37  
38 386 It was not feasible to blind participants, study pharmacists or ward physicians to group  
39  
40 387 allocation. To limit bias, the study was blinded on all steps considered possible to blind. Any  
41  
42 388 spill-over effect of the intervention to control patients would, in any case, reduce the effect  
43  
44 389 estimate. Due to the complexity of the intervention a proportion of the intervention patients  
45  
46 390 did not receive the complete intervention, which may also have contributed to the non-  
47  
48 391 significance on the primary endpoint and an underestimation of the effect on survival. The  
49  
50 392 broad inclusion criteria may have resulted in the inclusion of participants at low risk of  
51  
52 393 readmission and death, which might also have contributed to the non-significant result on  
53  
54 394 the primary endpoint, as well as buffered the effect of the intervention on survival. Studying  
55  
56  
57  
58  
59  
60

1  
2  
3 395 the effect of pharmacist-led medicines management in a subgroup of multimorbid patients  
4  
5 396 at the highest risk of readmission, e.g. by stratifying on frailty, could be useful. The  
6  
7  
8 397 randomized controlled design and the long follow-up of all patients are factors that  
9  
10 398 strengthen the study.

## 13 399 **CONCLUSION**

14  
15  
16  
17 400 Pharmacist-led medicines management in-hospital to multimorbid patients had no  
18  
19 401 statistically significant effect on time until readmission or death. A statistically significant  
20  
21  
22 402 increase in overall survival was seen. As a response to the increasing challenges of providing  
23  
24 403 safe and evidence-based healthcare to high-risk multimorbid patients, further studies should  
25  
26  
27 404 be conducted to investigate the effect of such an intervention on a larger scale.

28  
29  
30 405

31  
32  
33 406

## 34 35 36 407 **Competing interests statement**

37  
38  
39 408 Author ML received Ph.D. funding from the South-Eastern Norway Regional Health Authority  
40  
41 409 (grant number 12/00718). The other authors declare that they have no competing interests.

## 42 43 44 410 **Acknowledgments**

45  
46  
47 411 The authors thank the study pharmacists Anne Schwinghammer, Anette Engnes, Elin  
48  
49 412 Trapnes, Hanne Steen and Petra Foyndland for their valuable contribution in patient inclusion,  
50  
51 413 medicines reconciliation and review, senior physician Jo Fuglestved for summarizing the CCI  
52  
53 414 scores, Anne Mette Njaastad, Kristin Hestad Solheim, Kristin Thomassen and Torhild  
54  
55  
56  
57 415 Heggstad for valuable input on the study design, employees at the internal medicine ward  
58  
59  
60

1  
2  
3 416 for the positive attitude to the study, and finally Dominic Anthony Hoff for valuable support  
4  
5  
6 417 regarding data punching.  
7

#### 8 9 418 **Data sharing statement**

10  
11  
12 419 The data that support the findings of this study are available from Oslo University Hospital  
13  
14 420 but restrictions apply to the availability of these data, which were used under license for the  
15  
16 421 current study, and so are not publicly available. Deidentified participant data are however  
17  
18 422 available from the authors upon reasonable request and with permission of Oslo University  
19  
20 423 Hospital, with publication. Additional related documents, e.g. patient consent forms, are  
21  
22 424 available at request.  
23  
24  
25

#### 26 27 425 **Funding**

28  
29  
30 426 This work was supported by South-Eastern Norway Regional Health Authority (Ph.D. grant  
31  
32 427 number 12/00718 to author ML). Additional support was provided by the Hospital  
33  
34 428 Pharmacies Enterprise and Oslo University Hospital and Diakonhjemmet hospital. The  
35  
36 429 funders had no role in study design, data collection and analysis, decision to publish, or  
37  
38 430 preparation of the manuscript.  
39  
40  
41  
42

#### 43 431 **Author contributions**

44  
45  
46 432 **Marianne Lea:** Conceptualization, Formal analysis, Funding acquisition, Investigation,  
47  
48 433 Methodology, Project administration, Software, Writing – original draft, Writing – review &  
49  
50 434 editing  
51  
52  
53

54 435 **Morten Mowe:** Conceptualization, Funding acquisition, Methodology, Project  
55  
56 436 administration, Supervision, Writing – review & editing  
57  
58  
59  
60



- 1  
2  
3 437 **Espen Molden:** Conceptualization, Funding acquisition, Methodology, Supervision, Writing –  
4  
5  
6 438 review & editing  
7  
8  
9 439 **Kristin Kvernørød:** Investigation, Methodology, Resources, Writing – review & editing  
10  
11  
12 440 **Eva Skovlund:** Conceptualization, Formal analysis, Funding acquisition, Methodology,  
13  
14 441 Writing – review & editing  
15  
16  
17 442 **Liv Mathiesen:** Conceptualization, Formal analysis, Funding acquisition, Methodology,  
18  
19 443 Project administration, Supervision, Writing – original draft, Writing – review & editing  
20  
21  
22 444 **Disclaimer:** Data from the Norwegian Patient Registry has been used in this publication. The  
23  
24 445 interpretation and reporting of these data are the sole responsibility of the authors, and no  
25  
26 446 endorsement by the Norwegian Patient Registry is intended nor should be inferred.  
27  
28  
29  
30  
31  
32  
33  
34  
35  
36  
37  
38  
39  
40  
41  
42  
43  
44  
45  
46  
47  
48  
49  
50  
51  
52  
53  
54  
55  
56  
57  
58  
59  
60

## REFERENCES

1. Uijen AA, van de Lisdonk EH. Multimorbidity in primary care: prevalence and trend over the last 20 years. *The European journal of general practice*. 2008;14 Suppl 1:28-32.
2. Jureviciene E, Onder G, Visockiene Z, Puronaite R, Petrikonyte D, Gargalskaite U, et al. Does multimorbidity still remain a matter of the elderly: Lithuanian national data analysis. *Health policy (Amsterdam, Netherlands)*. 2018;122(6):681-6.
3. Mercer S, Salisbury C, Fortin M. ABC of Multimorbidity. First ed: John Wiley & Sons; 2014.
4. Marengoni A, Angleman S, Melis R, Mangialasche F, Karp A, Garmen A, et al. Aging with multimorbidity: a systematic review of the literature. *Ageing research reviews*. 2011;10(4):430-9.
5. Roberts KC, Rao DP, Bennett TL, Loukine L, Jayaraman GC. Prevalence and patterns of chronic disease multimorbidity and associated determinants in Canada. *Health promotion and chronic disease prevention in Canada : research, policy and practice*. 2015;35(6):87-94.
6. Brett T, Arnold-Reed DE, Popescu A, Soliman B, Bulsara MK, Fine H, et al. Multimorbidity in patients attending 2 Australian primary care practices. *Annals of family medicine*. 2013;11(6):535-42.
7. Nobili A, Marengoni A, Tettamanti M, Salerno F, Pasina L, Franchi C, et al. Association between clusters of diseases and polypharmacy in hospitalized elderly patients: results from the REPOSI study. *European journal of internal medicine*. 2011;22(6):597-602.
8. DuGoff EH, Canudas-Romo V, Buttorff C, Leff B, Anderson GF. Multiple chronic conditions and life expectancy: a life table analysis. *Medical care*. 2014;52(8):688-94.
9. Lehnert T, Heider D, Leicht H, Heinrich S, Corrieri S, Lupp M, et al. Review: health care utilization and costs of elderly persons with multiple chronic conditions. *Medical care research and review : MCRR*. 2011;68(4):387-420.
10. Boyd CM, Darer J, Boult C, Fried LP, Boult L, Wu AW. Clinical practice guidelines and quality of care for older patients with multiple comorbid diseases: implications for pay for performance. *Jama*. 2005;294(6):716-24.
11. Tinetti ME, Fried TR, Boyd CM. Designing health care for the most common chronic condition--multimorbidity. *Jama*. 2012;307(23):2493-4.
12. Barnett K, Mercer SW, Norbury M, Watt G, Wyke S, Guthrie B. Epidemiology of multimorbidity and implications for health care, research, and medical education: a cross-sectional study. *Lancet (London, England)*. 2012;380(9836):37-43.
13. Koberlein-Neu J, Mennemann H, Hamacher S, Waltering I, Jaehde U, Schaffert C, et al. Interprofessional Medication Management in Patients With Multiple Morbidities. *Deutsches Arzteblatt international*. 2016;113(44):741-8.
14. Fiss T, Meinke-Franze C, van den Berg N, Hoffmann W. Effects of a three party healthcare network on the incidence levels of drug related problems. *International journal of clinical pharmacy*. 2013;35(5):763-71.
15. Al Hamid A, Ghaleb M, Aljadhey H, Aslanpour Z. A systematic review of hospitalization resulting from medicine-related problems in adult patients. *British journal of clinical pharmacology*. 2014;78(2):202-17.
16. Gustafsson M, Sjolander M, Pfister B, Jonsson J, Schneede J, Lovheim H. Drug-related hospital admissions among old people with dementia. *European journal of clinical pharmacology*. 2016;72(9):1143-53.
17. Rafter N, Hickey A, Conroy RM, Condell S, O'Connor P, Vaughan D, et al. The Irish National Adverse Events Study (INAES): the frequency and nature of adverse events in Irish hospitals-a retrospective record review study. *BMJ quality & safety*. 2017;26(2):111-9.
18. Lea M, Rognan SE, Koristovic R, Wyller TB, Molden E. Severity and management of drug-drug interactions in acute geriatric patients. *Drugs & aging*. 2013;30(9):721-7.
19. Hohmann C, Neumann-Haefelin T, Klotz JM, Freidank A, Radziwill R. Drug-related problems in patients with ischemic stroke in hospital. *International journal of clinical pharmacy*. 2012;34(6):828-31.

- 1  
2  
3 496 20. El Morabet N, Uitvlugt EB, van den Bemt BJB, van den Bemt P, Janssen MJA, Karapinar-Carkit  
4 497 F. Prevalence and Preventability of Drug-Related Hospital Readmissions: A Systematic Review.  
5 498 *Journal of the American Geriatrics Society*. 2018;66(3):602-8.  
6 499 21. Schwab C, Korb-Savoldelli V, Escudie JB, Fernandez C, Durieux P, Saint-Jean O, et al.  
7 500 Iatrogenic risk factors associated with hospital readmission of elderly patients: A matched case-  
8 501 control study using a clinical data warehouse. *Journal of clinical pharmacy and therapeutics*.  
9 502 2018;43(3):393-400.  
10 503 22. Christensen M, Lundh A. Medication review in hospitalised patients to reduce morbidity and  
11 504 mortality. *The Cochrane database of systematic reviews*. 2016;2:Cd008986.  
12 505 23. Scullin C, Scott MG, Hogg A, McElnay JC. An innovative approach to integrated medicines  
13 506 management. *Journal of evaluation in clinical practice*. 2007;13(5):781-8.  
14 507 24. Midlov P, Holmdahl L, Eriksson T, Bergkvist A, Ljungberg B, Widner H, et al. Medication report  
15 508 reduces number of medication errors when elderly patients are discharged from hospital. *Pharmacy  
16 509 world & science : PWS*. 2008;30(1):92-8.  
17 510 25. Scullin C, Hogg A, Luo R, Scott MG, McElnay JC. Integrated medicines management - can  
18 511 routine implementation improve quality? *Journal of evaluation in clinical practice*. 2012;18(4):807-  
19 512 15.  
20 513 26. Midlov P, Deierborg E, Holmdahl L, Hoglund P, Eriksson T. Clinical outcomes from the use of  
21 514 Medication Report when elderly patients are discharged from hospital. *Pharmacy world & science :  
22 515 PWS*. 2008;30(6):840-5.  
23 516 27. Bergkvist A, Midlov P, Hoglund P, Larsson L, Bondesson A, Eriksson T. Improved quality in the  
24 517 hospital discharge summary reduces medication errors--LIMM: Landskrona Integrated Medicines  
25 518 Management. *European journal of clinical pharmacology*. 2009;65(10):1037-46.  
26 519 28. Alassaad A, Bertilsson M, Gillespie U, Sundstrom J, Hammarlund-Udenaes M, Melhus H. The  
27 520 effects of pharmacist intervention on emergency department visits in patients 80 years and older:  
28 521 subgroup analyses by number of prescribed drugs and appropriate prescribing. *PloS one*.  
29 522 2014;9(11):e111797.  
30 523 29. Perera R, Heneghan C, Yudkin P. Graphical method for depicting randomised trials of complex  
31 524 interventions. *BMJ (Clinical research ed)*. 2007;334(7585):127-9.  
32 525 30. World Health Organization. Collaborating Centre for Drug Statistics Methodology. ATC index  
33 526 with DDDs [cited 2018 September 20]. Available from: [https://www.whocc.no/atc\\_ddd\\_index/](https://www.whocc.no/atc_ddd_index/).  
34 527 31. Wallace E, McDowell R, Bennett K, Fahey T, Smith SM. Comparison of count-based  
35 528 multimorbidity measures in predicting emergency admission and functional decline in older  
36 529 community-dwelling adults: a prospective cohort study. *BMJ open*. 2016;6(9):e013089.  
37 530 32. Nilsson N, Lea M, Lao Y, Wendelbo K, Gløersen G, Mowé M, et al. Medication discrepancies  
38 531 revealed by medication reconciliation and their potential short-term and long-term effects: a  
39 532 Norwegian multicentre study carried out on internal medicine wards. *European Journal of Hospital  
40 533 Pharmacy*. 2015;22:298-303.  
41 534 33. Pharmaceutical Care Network Europe (PCNE). Classification for Drug related problems V 6.2.  
42 535 [cited 2018 April 3]. Available from: [http://www.pcne.org/upload/files/11\\_PCNE\\_classification\\_V6-  
43 536 2.pdf](http://www.pcne.org/upload/files/11_PCNE_classification_V6-2.pdf).  
44 537 34. Cockcroft DW, Gault MH. Prediction of creatinine clearance from serum creatinine. *Nephron*.  
45 538 1976;16(1):31-41.  
46 539 35. Salazar DE, Corcoran GB. Predicting creatinine clearance and renal drug clearance in obese  
47 540 patients from estimated fat-free body mass. *The American journal of medicine*. 1988;84(6):1053-60.  
48 541 36. Charlson ME, Pompei P, Ales KL, MacKenzie CR. A new method of classifying prognostic  
49 542 comorbidity in longitudinal studies: development and validation. *Journal of chronic diseases*.  
50 543 1987;40(5):373-83.  
51 544 37. Lea M, Mowe M, Mathiesen L, Kvernrod K, Skovlund E, Molden E. Prevalence and risk factors  
52 545 of drug-related hospitalizations in multimorbid patients admitted to an internal medicine ward. *PloS  
53 546 one*. 2019;14(7):e0220071.

- 1  
2  
3 547 38. Gail MH. Applicability of sample size calculations based on a comparison of proportions for  
4 548 use with the logrank test. *Controlled Clinical Trials*. 1985;6(2):112-9.
- 5 549 39. Fine JP, Gray RJ. A Proportional Hazards Model for the Subdistribution of a Competing Risk.  
6 550 *Journal of the American Statistical Association*. 1999;94(446):496-509.
- 7 551 40. Gillespie U, Alassaad A, Henrohn D, Garmo H, Hammarlund-Udenaes M, Toss H, et al. A  
8 552 comprehensive pharmacist intervention to reduce morbidity in patients 80 years or older: a  
9 553 randomized controlled trial. *Archives of internal medicine*. 2009;169(9):894-900.
- 10 554 41. Ravn-Nielsen LV, Duckert ML, Lund ML, Henriksen JP, Nielsen ML, Eriksen CS, et al. Effect of  
11 555 an In-Hospital Multifaceted Clinical Pharmacist Intervention on the Risk of Readmission: A  
12 556 Randomized Clinical Trial. *JAMA internal medicine*. 2018;178(3):375-82.
- 13 557 42. Makowsky MJ, Koshman SL, Midodzi WK, Tsuyuki RT. Capturing outcomes of clinical activities  
14 558 performed by a rounding pharmacist practicing in a team environment: the COLLABORATE study  
15 559 [NCT00351676]. *Medical care*. 2009;47(6):642-50.
- 16 560 43. Ravn-Nielsen LV, Duckert M-L, Lund ML, Henriksen JP, Nielsen ML, Eriksen CS, et al. Effect of  
17 561 an In-Hospital Multifaceted Clinical Pharmacist Intervention on the Risk of Readmission: A  
18 562 Randomized Clinical Trial. *JAMA internal medicine*. 2018;178(3):375-82.
- 19 563 44. Baker M, Bell CM, Xiong W, Etchells E, Rossos PG, Shojanian KG, et al. Do Combined  
20 564 Pharmacist and Prescriber Efforts on Medication Reconciliation Reduce Postdischarge Patient  
21 565 Emergency Department Visits and Hospital Readmissions? *J Hosp Med*. 2018;13(3):152-7.
- 22 566 45. Craig P, Dieppe P, Macintyre S, Michie S, Nazareth I, Petticrew M. Developing and evaluating  
23 567 complex interventions: the new Medical Research Council guidance. *BMJ (Clinical research ed)*.  
24 568 2008;337:a1655.
- 25 569 46. Richards D, Hallberg IR. Complex interventions in health. An overview of research methods.:  
26 570 Routledge; 2015.
- 27 571 47. Fernandes O. Medication reconciliation in the hospital: what, why, where, when, who and  
28 572 how? *Healthc Q*. 2012;15 Spec No:42-9.
- 29 573 48. Griese-Mammen N, Hersberger KE, Messerli M, Leikola S, Horvat N, van Mil JWF, et al. PCNE  
30 574 definition of medication review: reaching agreement. *International journal of clinical pharmacy*.  
31 575 2018;40(5):1199-208.

36  
37  
38  
39 57640  
41 57742  
43 57844  
45 579 **FIGURE LEGENDS**46  
47 **Figure 1.** Title: Graphical depiction of the study design, inspired by Perera and colleagues [29].48  
49 Objects are represented by squares and activities by circles.50  
51  
52 **Figure 2.** Title: Patient flow.53  
54  
55 **Figure 3**56  
57 **a)** Title: Time to first hospital readmission or death in the intervention versus the control group.58  
59 **b)** Title: Overall survival in the intervention versus the control group.  
60

1  
2  
3  
4  
5  
6  
7  
8  
9

## SUPPLEMENTARY MATERIAL

10  
11  
12  
13

**S1 Appendix.** Original trial protocol, protocol amendments, statistical analysis plan, statistical analysis plan amendment and timeline of the study with milestones.

14

**S2 Appendix.** CONSORT Checklist.

15  
16  
17  
18  
19  
20  
21  
22  
23  
24  
25  
26  
27  
28  
29  
30  
31  
32  
33  
34  
35  
36  
37  
38  
39  
40  
41  
42  
43  
44  
45  
46  
47  
48  
49  
50  
51  
52  
53  
54  
55  
56  
57  
58  
59  
60

**S3 Appendix.** Time to first hospital readmission in the intervention versus the control group, censored for deaths.

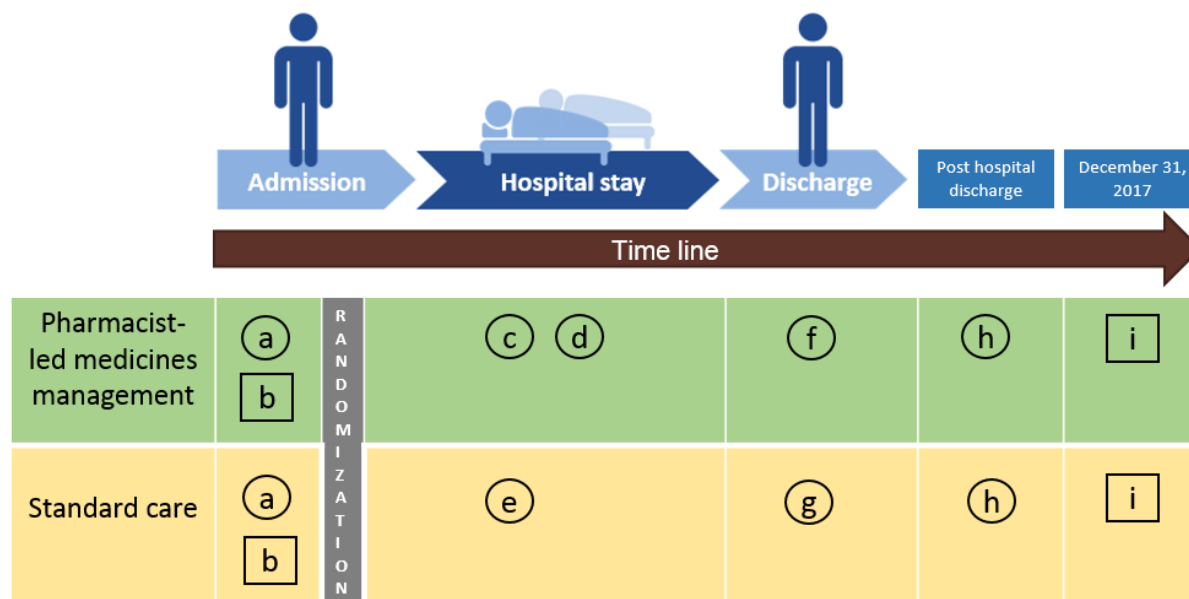

|     |                                                                                                                                                                                                                                                                                                                                                                                                                                                                                                                                                                                                                                                                                                                                                                                                                                                                                                                                                                                              |
|-----|----------------------------------------------------------------------------------------------------------------------------------------------------------------------------------------------------------------------------------------------------------------------------------------------------------------------------------------------------------------------------------------------------------------------------------------------------------------------------------------------------------------------------------------------------------------------------------------------------------------------------------------------------------------------------------------------------------------------------------------------------------------------------------------------------------------------------------------------------------------------------------------------------------------------------------------------------------------------------------------------|
| (a) | Medicines reconciliation and review conducted by clinical pharmacist <i>without</i> discussion of medicine discrepancies or drug-related problems (DRPs) and possible solutions in the multidisciplinary team <sup>a</sup>                                                                                                                                                                                                                                                                                                                                                                                                                                                                                                                                                                                                                                                                                                                                                                   |
| [b] | Patient characteristics collected                                                                                                                                                                                                                                                                                                                                                                                                                                                                                                                                                                                                                                                                                                                                                                                                                                                                                                                                                            |
| (c) | Multidisciplinary treatment team <sup>a</sup> discussions of medicine discrepancies and DRPs revealed at hospital admission and possible solutions                                                                                                                                                                                                                                                                                                                                                                                                                                                                                                                                                                                                                                                                                                                                                                                                                                           |
| (d) | Medicines review conducted by clinical pharmacists by systematically addressing 11 pre-defined risk categories for each drug each patient was prescribed at a given point of time; drug monitoring, adverse effect, drug-drug interaction, non-optimal drug therapy, reduced organ function/contraindication, inappropriate drug in elderly, unnecessary drug, course length, practical problem, adherence issue and other. Medicines reviews were performed at admission and repeatedly as needed due to changes in either prescription, patient symptoms, clinical state, and/or laboratory values. Patients were reviewed for such changes daily, Monday to Friday, during regular daytime working hours. Consecutively multidisciplinary treatment team <sup>a</sup> discussions of identified DRPs and possible solutions.                                                                                                                                                              |
| (e) | Standard in-hospital care provided by physicians with internal medicine expertise, nursing staff and when needed; clinical nutrition physiologists and/or physiotherapists                                                                                                                                                                                                                                                                                                                                                                                                                                                                                                                                                                                                                                                                                                                                                                                                                   |
| (f) | Medicines reconciliation, followed by written and verbal information tailored to the patient's further needs of care, as well as discharge activities aiming to ensure continuous treatment and increase adherence: <ul style="list-style-type: none"> <li>• Written systematic information comprising a reconciled drug list with description and justification for all changes made during the hospital stay, to the next care provider<sup>b</sup> (all patients), and to the patient/relative if they to some extent would be involved in handling the drugs after discharge</li> <li>• Verbal information/conversation with the patient and/or relative adapted to the patient needs<sup>c</sup> - if they to some extent would be involved in handling the drugs after discharge</li> <li>• Assistance with retrieving drugs from the pharmacy, if needed</li> <li>• Providing the patient with drugs from the hospital pending on an updated multidose delivery, if needed</li> </ul> |
| (g) | Discharge medicine information (not standardized) provided by physicians with internal medicine expertise and nursing staff                                                                                                                                                                                                                                                                                                                                                                                                                                                                                                                                                                                                                                                                                                                                                                                                                                                                  |
| (h) | Standard care in the primary health care (details not collected)                                                                                                                                                                                                                                                                                                                                                                                                                                                                                                                                                                                                                                                                                                                                                                                                                                                                                                                             |
| [i] | Last day of follow-up on readmissions and mortality outcomes                                                                                                                                                                                                                                                                                                                                                                                                                                                                                                                                                                                                                                                                                                                                                                                                                                                                                                                                 |

<sup>a</sup> The multidisciplinary treatment team consisted of physician with expertise in internal medicine, nursing staff, clinical pharmacist, and when needed; clinical nutrition physiologists and/or physiotherapists

<sup>b</sup> The general practitioner, nursing home, home nurse and/or multidose delivering pharmacy.

<sup>c</sup> Sometimes regarding the entire drug list, sometimes the most important changes, sometimes regarding one specific drug. If the patient was considered to benefit from any provided information or given the opportunity to ask questions, such a targeted conversation was conducted, even if a complex conversation was not considered favorable.

**Enrollment**

1769 Patients assessed for eligibility

24 Patients lost before randomization  
 8 Withdrawal of consent  
 5 Transferred to other hospital ward  
 5 Discharged  
 3 Died  
 3 Medicines reconciliation revealed use of less than 4 regular drugs

1346 Excluded patients  
 913 Not meeting inclusion criteria  
 258 Not asked to participate due to study pharmacist capacity  
 175 Declined to participate

399 Randomized

199 Allocated to control group  
 193 Received allocated care  
 6 Did not receive allocated care - intervention due to severe medicines discrepancy or drug-related problem

**Allocation**

200 Allocated to intervention group  
 123 Received allocated intervention  
 77 Did not receive complete allocated intervention

6 Died during index hospital stay

5 Died during index hospital stay

**Follow-Up**

2 Erroneous inclusions  
 1 Re-inclusion  
 1 Lacking Norwegian personal Identification number

**Analysis**

193 Included in analysis

193 Included in analysis

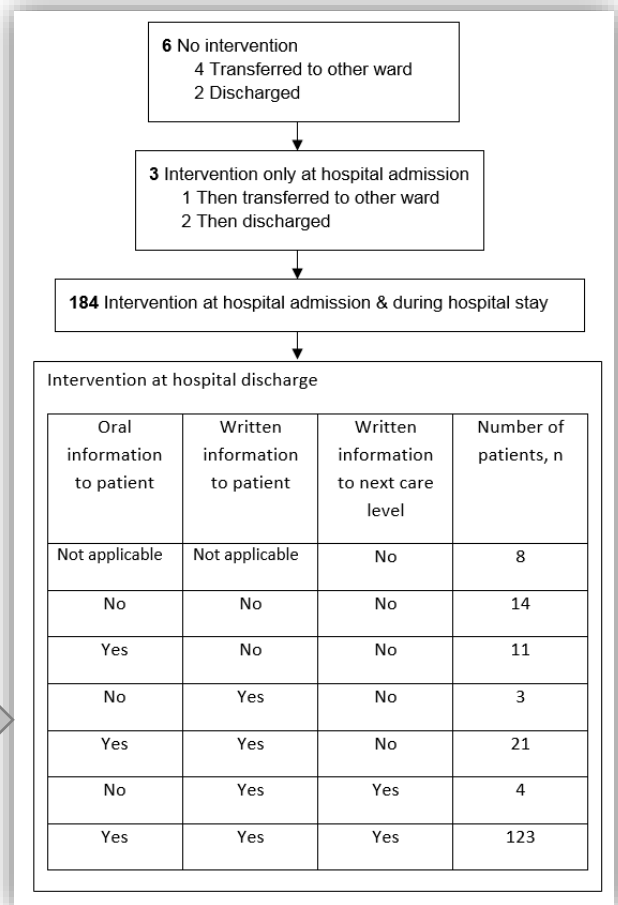



|                | Time since discharge, months |     |    |    |    |    |    |    |    |    |    |    |    |    |
|----------------|------------------------------|-----|----|----|----|----|----|----|----|----|----|----|----|----|
| Number at risk | 0                            | 3   | 6  | 9  | 12 | 15 | 18 | 21 | 24 | 27 | 30 | 33 | 36 | 39 |
| Intervention   | 193                          | 115 | 97 | 82 | 68 | 53 | 49 | 42 | 37 | 31 | 26 | 15 | 10 | 2  |
| Control        | 193                          | 107 | 80 | 69 | 54 | 42 | 40 | 34 | 23 | 13 | 11 | 5  | 3  | 1  |

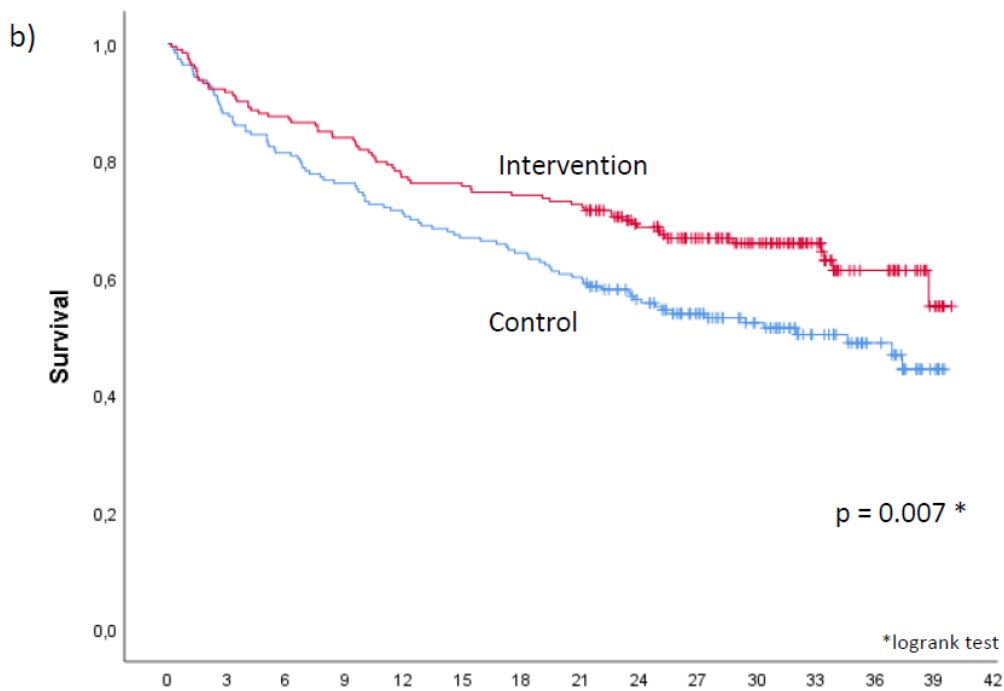

|                | Time since discharge, months |     |     |     |     |     |     |     |     |    |    |    |    |    |
|----------------|------------------------------|-----|-----|-----|-----|-----|-----|-----|-----|----|----|----|----|----|
| Number at risk | 0                            | 3   | 6   | 9   | 12  | 15  | 18  | 21  | 24  | 27 | 30 | 33 | 36 | 39 |
| Intervention   | 193                          | 177 | 169 | 162 | 149 | 146 | 143 | 140 | 115 | 93 | 73 | 49 | 27 | 8  |
| Control        | 193                          | 170 | 157 | 147 | 137 | 129 | 124 | 116 | 97  | 76 | 59 | 40 | 25 | 7  |



1  
2  
3  
4  
5  
6  
7  
8  
9  
10  
11  
12  
13  
14  
15  
16  
17  
18  
19  
20  
21  
22  
23  
24  
25  
26  
27  
28  
29  
30  
31  
32  
33  
34  
35  
36  
37  
38  
39  
40  
41  
42  
43  
44  
45  
46  
47  
48  
49  
50  
51  
52  
53  
54  
55  
56  
57  
58  
59  
60

## S1 Appendix

### Contents

|                                   |         |
|-----------------------------------|---------|
| Original trial protocol           | Page 2  |
| Protocol amendments               | Page 17 |
| Statistical analysis plan (SAP)   | Page 19 |
| SAP amendment                     | Page 28 |
| Timeline of the study, milestones | Page 29 |

## ORIGINAL TRIAL PROTOCOL

**English title:****Effect of a Pharmacist Intervention on Hospital Readmissions**

**A project at the Internal Medicine Ward, the Medical Clinic, Oslo University Hospital, Norway, in cooperation with Hospital Pharmacies Enterprise, South-Eastern Norway Regional Health Authority and University of Oslo, Norway**

Study protocol version number 1 – 07-04-2014

## Project members

**Project leader and co-supervisor:** Associate professor at University of Oslo, Norway, Head of the internal medicine ward at Oslo University Hospital, Norway, MD, PhD Morten Mowe, [mormow@ous-hf.no](mailto:mormow@ous-hf.no)

**PhD student and responsible study pharmacist:** Marianne Lea, MScPharm, MScClinPharm, [marianne.lea@sykehusapotekene.no](mailto:marianne.lea@sykehusapotekene.no)

**Responsible for the study:** Oslo University Hospital, Norway. Contact: Morten Mowe, head of the internal medicine ward, [mormow@ous-hf.no](mailto:mormow@ous-hf.no)

**Responsible for data processing:** Oslo University Hospital, Norway. Contact: Morten Mowe, head of the internal medicine ward, [mormow@ous-hf.no](mailto:mormow@ous-hf.no)

Other project members and collaborators:

- Espen Molden, professor at the School of Pharmacy, University of Oslo, Norway main supervisor
- Liv Mathiesen, Dr. scient, head of research and development, Hospital Pharmacies Enterprise, co-supervisor
- Kristin Hestad, section head nurse of the internal medicine ward, The Medical Clinic, Oslo University Hospital, project member
- Anne Mette Njaastad, senior physician at the internal medicine ward , The Medical Clinic, Oslo University Hospital, project member
- Kristin Thomassen, quality adviser, The Medical Clinic Oslo University Hospital, project member
- Britt Petterson, nurse at the internal medicine ward , The Medical Clinic, Oslo University Hospital, project member
- Anette Engnes, master student at the School of Pharmacy, University of Oslo, Norway, project member

Torhild Heggstad, MD, PhD, advisor in Helse-Bergen, Norway, collaborator

## Abstract

Several Norwegian studies have shown that pharmacists working in multidisciplinary treatment teams solve and prevent drug-related problems (DRP). Studies investigating the effect of pharmacist interventions on clinical relevant outcome measures are however lacking. Readmissions have both negative clinical and economic consequences, and time to the first readmission is considered as a clinical relevant outcome measure. The main aim of the current study is to investigate the effect of a pharmacist intervention, on patients` time to the first hospital readmission. The study is carried out as a randomised controlled, unblinded study. In total, 400 patients will be included.

Patients acutely admitted to the internal medicine ward at Oslo University Hospital, Ullevaal, using a minimum of 4 regular drugs from a minimum of 2 therapeutic classes (ATC level 1), will be enrolled in the study following written informed consent. The patient inclusion period starts in August 2014, and will last until the target number of patients have been included, estimated to approximately one year.

A “baseline assessment” will be conducted by a pharmacist for all included patients, consisting of medicines reconciliation and review at hospitalization, to measure frequency of DRPs at admission. Retrospectively, an assessment of whether DRPs may have led to the hospitalisation will be conducted, by comparing possible consequences of the DRPs with the admission cause.

Following the baseline assessment, the patients will be randomized to the control- or intervention group. Patients in the control group will receive in-hospital standard care, i.e. without pharmacist involved. Patients in the intervention group will receive a pharmacist intervention comprising inclusion of a pharmacist in the multidisciplinary treatment team during the hospital stay. The pharmacist will conduct medication reconciliation at admission, perform medication reviews during the hospital stay and provide drug information (written and oral) to the patient before discharge, as well as written drug information to the next level of care.

The main outcome measure is difference between the control- and intervention groups in time to the first readmission, in the intention-to-treat population. Data on readmissions will be retrieved from the Norwegian Patient Registry.

**Contents**

1  
2  
3  
4  
5 Project members ..... 3  
6  
7 Abstract ..... 4  
8  
9 Abbreviations: ..... 6  
10 Introduction..... 7  
11  
12 Aim ..... 7  
13  
14 Methods ..... 7  
15  
16 Ethics and safety..... 14  
17  
18 Statistics ..... 15  
19  
20 Time Schedule ..... 15  
21  
22 Budget ..... 16  
23  
24  
25  
26  
27  
28  
29  
30  
31  
32  
33  
34  
35  
36  
37  
38  
39  
40  
41  
42  
43  
44  
45  
46  
47  
48  
49  
50  
51  
52  
53  
54  
55  
56  
57  
58  
59  
60

References..... 16

For peer review only

**Abbreviations:**

|      |                                  |
|------|----------------------------------|
| ATC  | Anatomical Therapeutic Chemical  |
| CIRS | Cumulative Illness Rating Scale  |
| DRP  | Drug-related problem             |
| IMM  | Integrated Medicines Management  |
| ITT  | Intention to treat               |
| MAI  | Medication Appropriateness Index |
| NPR  | Norwegian Patient Registry       |
| REK  | Regional ethics committee        |
| UIO  | University of Oslo               |

## Introduction

The individual patient's drug therapy steadily becomes more complicated (1). It has been estimated that more than half of the drugs prescribed are used inappropriately, and 5-10% of admissions to internal medicine hospital wards can be attributed to inappropriate use of drugs (1). Inappropriate drug use has both clinical and economic consequences and "the Norwegian's" Medicines Agency have estimated that direct cost of hospital admissions caused by adverse drug reactions equals 300-400 million annually (1).

A significant proportion of the medication errors appear at transition points between care levels, due to missing or uncomplete information provided during transition. At hospital admission, errors in the drug lists have been reported in 85-95 % of patients (2, 3). Furthermore, up to 40% of hospitalizations in the elderly are known to be caused by adverse drug reactions, whereof the majority could be avoided (4, 5).

Pharmacists may contribute in multidisciplinary treatment teams in hospitals by tailoring and optimizing patients' drug therapy during hospitalizations, and preventing drug errors at transition points between different levels in the healthcare system (6, 7). In Norway, several studies have shown that pharmacists solve and prevent DRPs when working in multidisciplinary treatment teams in hospitals (8-10), but studies investigating the effect of such interventions on clinical relevant outcome measures is lacking. Readmissions is perceived as a burden to both patients and their relatives, in addition to being resource demanding to the society. Time to the first readmission is therefore considered as a clinical relevant outcome measure.

The internal medicine ward in the Medical Clinic at Oslo University Hospital, Norway, comprises 24 beds, and have around 100 patient admissions per month according to the annual report of the Medical Clinic, Oslo University Hospital. The patients are often multimorbid and use many drugs. The most common reasons for hospitalization are deep vein thrombosis, pulmonary embolism, diabetes and pneumonia. Due to its patient population, the internal medicine ward is a suitable place to conduct the present study.

## Aim

The main aim of this study is to investigate the effect of a pharmacist intervention on the patients' time to the first hospital readmission.

## Methods

- *Study design*  
Randomized controlled, unblinded, intervention study
- *Study location and –period*

The study will be conducted at the internal medicine ward, Oslo University Hospital, Ullevaal location, Norway. Patient inclusion will start autumn 2014, and last until the target number of patients are included. The goal is to include the target number of patients within one year. The follow-up will last for 12 months after discharge for readmissions and contact with emergency rooms, by data from the Norwegian Patient Registry, and mortality, by data from Statistics Norway.

- *Inclusion criteria*

1  
2  
3 Adult women and men acutely admitted to the internal medicine ward, using a minimum of 4  
4 regular drugs from a minimum of 2 therapeutic classes (ATC level 1) before medicines  
5 reconciliation – the latter as a surrogate for the number of diagnoses. If it is revealed during  
6 medicines reconciliation that a patient was using less than 4 regular drugs from less than 2  
7 therapeutic classes (ATC level 1) before hospitalization, the patient will be excluded from the  
8 study.  
9  
10

#### 11 *Exclusion criteria*

- 12
- 13
- 14 ○ Terminally ill patients
- 15 ○ Patients not able to communicate in Norwegian language or English
- 16 ○ Patients who do not want to participate in the study
- 17 ○ Patients previously included into the study, will not be re-included during their
- 18 second admission to the general internal medicine ward, neither receive the study
- 19 intervention during this second hospitalization
- 20
- 21
- 22
- 23
- 24 • *Number of patients that will be included*
- 25 Readmission frequencies in earlier studies in Ireland and Sweden, as well as Oslo University
- 26 Hospital , is estimated to approximately 50% in a year. To be able to detect a 15% absolute
- 27 reduction in readmissions, with 80% power, 168 patients must be included to both treatment
- 28 groups. To account for dropouts, 200 patients will be included to both the control and the
- 29 intervention groups.
- 30
- 31
- 32
- 33 • *Randomization procedure*
- 34 Following inclusion, patients will be allocated by a randomization sequence with a permuted
- 35 block design, to the control- or intervention group. The Centre for Biostatistics and
- 36 Epidemiology, Oslo University Hospital, Norway, is responsible for the randomization
- 37 procedure and will deliver allocation envelopes. Study pharmacists will conduct the inclusion
- 38 according to the randomizing procedure, for all included patients.
- 39
- 40
- 41
- 42
- 43
- 44
- 45
- 46
- 47
- 48
- 49
- 50
- 51
- 52
- 53
- 54
- 55
- 56
- 57
- 58
- 59
- 60



• *Flow chart and description of study arms:*

Figure 1 shows the flowchart for the study, including a description of when the different steps in the study should be conducted



1  
2  
3 Figure 1. Overview over how the study will be conducted.

4 ATC = Anatomical Therapeutic Chemical, DRP = drug-related problems, CIRS = Cumulative Illness Rating Scale.

5  
6 "Baseline assessment"

7  
8 For all included patients, a «baseline assessment» will be conducted, consisting of three steps:

- 9  
10
- 11 ○ Assessing the DRP prevalence at admission, by conducting medicines  
12 reconciliation and –review
  - 13 ○ Assessing the patients` ability to metabolize drugs, as determined from a blood  
14 sample
  - 15 ○ Assessing the patients` morbidity, by using the standardized method Cumulative  
16 Illness Rating Scale (CIRS)
- 17

18 The "baseline assessment" will be conducted before the randomization, to avoid data collection bias.

19  
20 For all included patients, a blood sample (full blood) will be sent to Center for Psychopharmacology at  
21 Diakonhjemmet Hospital, and analysed for the patient`s ability to metabolize drugs. The blood  
22 sample will be drawn as a part of standard blood tests at hospitalization. It will be investigated  
23 whether congenital variation in the ability to metabolize drugs correlates with DRP and/or morbidity.  
24 By comparing possible consequences of DRP at hospitalization, it will be investigated whether DRPs  
25 may have caused the hospitalization. A group of physicians and pharmacists will conduct these  
26 assessments in collaboration.  
27  
28

29  
30 Control group and intervention group

31  
32 Patients randomized to the control group will receive standard care at the internal medicine ward,  
33 provided by physicians and nursing staff, without pharmacist involved. If a physician should request  
34 pharmacist advice regarding a patient randomized to the control group, a pharmacist will deliver this,  
35 and the patient will be excluded from the study.  
36  
37

38 Patients randomized to the intervention group will receive pharmacist intervention in addition to  
39 standard care during the hospital stay. This comprises inclusion of a pharmacist in the  
40 multidisciplinary treatment team around the patients, conducting the following tasks:

- 41  
42
- 43 1) Discussion with physician responsible for the patient regarding possible solutions on  
44 DRPs revealed at baseline (admission) by medicines reconciliation (11) and review  
45 (12). Medicines review will be conducted repeatedly at changes in drug therapy or  
46 the patient`s clinical state.
  - 47 2) Drug information at discharge will be written by a template where all changes in the  
48 patient`s drug list during the hospital stay will be systematically described and  
49 justified. The drug information will be approved by the hospital physician responsible  
50 for the patient`s treatment and delivered to the patient and the next care level at  
51 hospital discharge.
  - 52 3) Oral drug information before discharge, where the aim is to improve the patient`s  
53 adherence, for patients supposed to handle drugs themselves after discharge.  
54  
55  
56  
57

58 Procedures and training

59  
60 Protocol Version number 1, 07.04.2014, Page 9/15

1  
2  
3 The Hospital Pharmacies Enterprise's procedures for the conduct of medicines reconciliation and  
4 review will be followed during the conduct of these tasks (11, 12). The procedures are based on the  
5 "Integrated Medicines Management" (IMM)- model, for clinical pharmacists, developed in Northern  
6 Ireland (6, 13) and further developed in Sweden (14) and Central Norway (15). When working  
7 according to this model, the pharmacists' continuous and systematic evaluation of the patient's drug  
8 treatment at hospital admission (medicines reconciliation), during the hospital stay (medicines  
9 review) and at discharge (systematic drug information) is ensured. Procedures and forms are used  
10 during each step of IMM.  
11  
12  
13

14 Medicines reconciliation involves the identification of a complete and accurate list of drugs currently  
15 in use by a patient, by using different and the most optimal sources of information, including the  
16 patient, their next of kin, home care nurse, nursing home staff, pharmacy and/or general  
17 practitioner. Medicines discrepancies between drugs prescribed at hospitalization and the complete  
18 drug list, are revealed. Medicines review is a systematic review of a patients' drug treatment, using a  
19 checklist of risk categories, where the drugs' effect, safety and indications are evaluated. Potential  
20 and manifested DRPs are revealed.  
21  
22  
23

24 DRPs revealed in patients who, following the baseline assessment are allocated to the control group,  
25 will not be discussed with the physician responsible for the patient's treatment, unless they are  
26 considered by the pharmacists as being of major clinical relevance, i.e. that they may cause  
27 detrimental effects or death. If the pharmacist is in doubt regarding the severity of a DRP, the  
28 decision will be taken by the project leader Dr. nn, or the medical responsible senior physician at the  
29 internal medicine ward, nn. If DRPs with severe clinical relevance are revealed in patients allocated  
30 to the control group, they will be discussed with the ward physician responsible for patient  
31 treatment, and the patient will be excluded from the study.  
32  
33  
34

35 Clinical pharmacists conducting the pharmacist intervention in the study shall attend and get  
36 approval of training in the different working methods;  
37  
38

- 39 ○ Three day theoretical course in medicines reconciliations and reviews by IMM,  
40 followed by practical training including feedback on their individual performance  
41 provided by a clinical supervisor.
- 42 ○ The course "From monologue to dialogue – communicating with patients in  
43 theory and practice", comprising theoretical and practical training in talking with  
44 patients about drugs, with feedback from a supervisor.  
45  
46  
47  
48

- 49 ● *Demographic data and measurements*

50 The following demographic data and measurements will be registered for the study population:  
51

- 52 ✓ Age
- 53 ✓ Sex
- 54 ✓ Cause of hospitalization
- 55 ✓ Diagnoses according to ICD-10, as described in the patient's medical record,  
56 i.e. diagnoses in the epicrisis, and in addition other diagnoses clearly  
57  
58  
59

described in the medical record during the hospital stay, but not listed in the epicrisis.

- ✓ Where the patient is admitted from (home, other hospital, other hospital ward in the same hospital, nursing home, emergency room, general practitioner, municipal emergency room, others)
- ✓ Assistance with handling of drugs prior to admission: nursing home, home nurse, multidose dispensed drugs, patients handling drugs themselves or not
- ✓ Hospital admission date
- ✓ Internal medicine ward admission date
- ✓ Date for last hospitalization (from the Norwegian Patient Registry)
- ✓ Date for medicines reconciliation and review conducted by pharmacist
- ✓ Drug list documented at hospital admission, including over-the-counter drugs, natural/herbal drugs (when documented). Drug name, strength, dosage, formulation (e.g. injection, rectal, oral) and time of dose.
- ✓ Drug list obtained by pharmacist, including over-the-counter drugs and natural/herbal drugs. Drug name, strength, dosage, formulation (e.g. injection, rectal, oral) and time of dose.
- ✓ Source(s) used during the medicines reconciliation (nursing home, general practitioner, multidose delivering pharmacy or next of kin)
- ✓ Drug treatment during the hospital stay
- ✓ Number and type DRPs revealed by medicines reconciliation and review, if the DRPs are discussed with the ward physician responsible for the treatment or not, and eventual results of such discussion
- ✓ Discharge date
- ✓ Where the patient is discharged to (home, other hospital, other ward at the same hospital, nursing home, others)
- ✓ Drug list at discharge. Drug name, strength, dosage, formulation (e.g. injection, rectal, oral) and time of dose.
- ✓ Results from the blood test, ability to metabolize drugs
- ✓ Morbidity at hospitalization, by using Cumulative Illness Rating Scale (CIRS)

The primary endpoint is difference between the control and intervention group in time to the first readmission, for the intention-to-treat-population. Data on readmissions will be obtained from the Norwegian Patient Registry.

Differences in clinically relevant outcome measures will be investigated between patients receiving the pharmacist intervention (intervention group) and patients not receiving pharmacist intervention (control group). Secondary endpoints will include:

- ✓ Number of readmissions during 30 days, 6 months, 12 months
- ✓ Proportion of patients readmitted during 30 days, 6 months and 12 months after discharge
- ✓ Number of contacts with emergency rooms during 30 days, 6 months and 12 months after discharge
- ✓ Proportion of patients in contact with emergency rooms during 30 days, 6 months and 12 months after discharge

- ✓ Number of days to the first readmission
- ✓ Length of stay (days) during the first readmission
- ✓ Number of days to contact with emergency room
- ✓ Mortality: Proportion of patients who dies in the 12 months after discharge
- ✓ Difference in Medicines Appropriateness Index (MAI)-score (16) from admission to discharge
- ✓ Quality of discharge drug information
- ✓ Difference in DRP prevalence (number and type of DRPs) at hospitalization
- ✓ Difference in morbidity (CIIRS) at hospitalization

Further, any difference in “DRP -load” and morbidity (CIRS) at hospitalization will be investigated in patients hospitalized compared to those not hospitalized during the last 6 months before index admission. Any possible causal relationship between DRPs and hospitalizations will be assessed. Congestinal variations in ability to metabolize drugs will be assessed against “DRP-load” and/or morbidity.

The number of phone calls after discharge from the next care level to the internal medicine ward, will be measured by statistical process control (SPC).

Outcome measures including readmissions, emergency room contacts and mortality will be registered in the control- and intervention group at three points of time: 30 days, 6 months and 12 months after discharge. All cause readmissions will be registered. The main cause of readmission or contact with the emergency room will be registered. Data on readmissions and emergency room contacts will be obtained from NPR. Data on mortality will be obtained from Statistics Norway, after necessary permissions from the State Health Authority and the The Norwegian Data Protection Authority are obtained.

- *Privacy policy and information*

Patients will be enrolled following written informed consent. The physician responsible for the patient’s treatment at the hospital decides whether the patient is competent to consent or not. Written informed consent will be obtained from next of kin for patients who are not competent to consent. After written consent is obtained, the patient will be provided a study number. The enrolled patients will have the right to withdraw their consent at any time point, without giving any explanation. The participants will receive a copy of the informed consent. The information leaflet will describe that participation in the study includes extraction of data from the Norwegian Patient Registry and Statistics Norway during the first year after hospital discharge. The signed consents will be stored in a locked cabinet at the hospital together with the code list.

- *Processing and storage of data*

All data will be handled confidentially and personal, identifiable data will not be taken out of the hospital. The data will be processed without patient names or personal identification numbers, after each participant has been given a study number. The code list linking the study number to the

1  
2  
3 personal identification number, will be stored in a locked cabinet at the hospital, separately from  
4 other data. The code list will be shredded August 2018 at latest. Signed informed consents will be  
5 stored together with the code list. Study forms (paper) will be stored without patient names or  
6 personal identification numbers, in a locked cabinet and unavailable for unauthorized persons.  
7 Electronic data files will be stored without patient names or personal identification numbers, and  
8 processed in a research database at Oslo University Hospitals research server.  
9  
10  
11  
12  
13

- 14 • *Definition of analysis population*

15 An Intention-to-treat (ITT) analysis will be conducted. All randomized patients will be included in the  
16 analysis. Patients lost to follow-up will be included in the analysis as «not readmitted», «not had  
17 contact with emergency rooms». A per protocol analysis will also be conducted. Patients dying during  
18 the study period will only be included in mortality analysis.  
19  
20

## 21 **Ethics and safety**

22  
23 The study hypothesis is that pharmacists' care in the intervention group, will lead to increased quality  
24 of drug treatment compared to the control group, and that this may be reflected by reduced risk of  
25 hospital readmission after discharge. There might be a risk of lower quality drug treatment in the  
26 intervention group. We consider the probability of this to be low.  
27  
28

29 Pharmacists' care during a hospital stay is not included in standard care today. Patients in the control  
30 group will therefore be provided with the same care during their hospital stay, as they would have  
31 been provided with if they did not participate in the study. All included patients will have a  
32 conversation with a pharmacist and a blood sample will be drawn, which is not considered to cause  
33 any disadvantage to the patients. The blood sample will be drawn as a part of the samples taken due  
34 to hospitalization. Before patients are enrolled, they will receive an information leaflet of the study  
35 and they will themselves decide whether they want to participate or not.  
36  
37  
38

39 To document the effect of clinical pharmaceutical intervention in Norwegian hospitals is necessary,  
40 and randomized controlled trials are the gold standard. On this basis, it is considered necessary to  
41 randomize to a control group receiving standard care, i.e. without pharmacist involved. During  
42 standard care at the internal medicine ward, no patients receive pharmacist intervention the way it is  
43 planned conducted in the study. This means that it makes no difference for patients in the control  
44 group, whether the study is conducted or not. If potentially severe DRPs are revealed after  
45 hospitalization, they will be discussed with the responsible ward physician, and the patient will be  
46 excluded from the study. If a physician at the general internal medicine ward request a pharmacist's  
47 opinion in some degree to patients allocated to the control group, this will be provided, and the  
48 patient will be excluded from the study. In this way, the safety of patients in the control group is  
49 secured, and we hence consider the study as ethical acceptable.  
50  
51  
52  
53  
54

55 A biobank will be established, called «blood samples for analysis of drug metabolizing enzymes». The  
56 project leader is responsible for the biobank. Blood samples will be marked with the patient's study  
57 number and locked in and separated from the code list connecting patient identity to study number.  
58  
59  
60

1  
2  
3 The blood samples will be transported by a project group member from the ward at Oslo University  
4 Hospital to Center for Psychopharmacology at Diakonhjemmet Hospital, where the analysis will be  
5 conducted.  
6  
7

8 All collected data will be handled confidentially and personal identifiable data will not be taken out of  
9 the hospital. The data will be processed without patient identification, with a study number per  
10 patient. The code list connecting patient identity to study number will be locked in at the hospital  
11 and separated from other data. The code list will be deleted December 31th 2018 at the latest.  
12 Signed informed consents will be stored locked in, together with the code list. Paper versions of data  
13 registration forms will be without patient identification and stored locked in and not available for  
14 unauthorized persons. Electronical data without patient identification will be stored and processed in  
15 a research database, stored at Oslo University Hospital`s research server.  
16  
17  
18

19 Approvals from Regional committees for medical and health research ethics (REK) and the Personal  
20 Ombudsman will be obtained. For retrieval of data on mortality from Statistics Norway will necessary  
21 approvals be obtained from the State Health Authority and the The Norwegian Data Protection  
22 Authority.  
23  
24

25 There is no conflicts of interests by conducting the study.  
26

## 27 **Statistics**

28 Demographics will be presented as proportions, means with standard deviations or medians with  
29 ranges. The primary endpoint (time to first readmission) will be estimated using Kaplan Meier  
30 analysis and the groups will be compared by log rank test. The frequency endpoints will be analysed  
31 by chi square tests. Continuous variables will be analysed with Mann-Whitney tests or t-tests. A  
32 significance level at 5% will be used.  
33  
34  
35

## 36 **Time Schedule**

37 Spring 2014: Complete study protocol, clarify collaborators  
38

39 By April 8<sup>th</sup> 2014: Application to Regional committees for medical and health research ethics  
40

41 March to August 2014: Necessary training provided to clinical pharmacists  
42

43 May to June 2014: Develop and complete databases and data collection forms  
44

45 August 2014: Data inclusion start, assumed duration of patient inclusion approximately 1 year, then 1  
46 more year before data on readmissions can be retrieved  
47  
48

49 August 2015 to December 2016: Data processing, data analysis, prepare papers  
50

51 Spring 2017: Write PhD thesis  
52

53 Autumn 2017: Submit and defend PhD thesis  
54  
55  
56  
57  
58  
59  
60



## Budget

The project is assigned a PhD grant, 4 years 75% position, from South-Eastern Norway Regional Health Authority, project number 2013055. In addition, an 80% pharmacist position, funded by Oslo University Hospital and the Medical Clinic will be used into the project.

## References

1. White paper number 18 (Norway 2004-2005). [Right direction towards more optimal use of drugs.] Legemiddelpolitikken.
2. Myhr R, Kimsas A. [Medication errors when transferring within health care services]. Tidsskrift for den Norske lægeforening : tidsskrift for praktisk medicin, ny række. 1999;119(8):1087-91.
3. Midlov P, Bergkvist A, Bondesson A, Eriksson T, Hoglund P. Medication errors when transferring elderly patients between primary health care and hospital care. Pharmacy world & science : PWS. 2005;27(2):116-20.
4. Lazarou J, Pomeranz BH, Corey PN. Incidence of adverse drug reactions in hospitalized patients: a meta-analysis of prospective studies. JAMA. 1998;279(15):1200-5.
5. Beijer HJ, de Blaey CJ. Hospitalisations caused by adverse drug reactions (ADR): a meta-analysis of observational studies. Pharm World Sci. 2002;24(2):46-54.
6. Scullin C, Scott MG, Hogg A, McElnay JC. An innovative approach to integrated medicines management. Journal of evaluation in clinical practice. 2007;13(5):781-8.
7. Hellstrom LM, Bondesson A, Hoglund P, Midlov P, Holmdahl L, Rickhag E, et al. Impact of the Lund Integrated Medicines Management (LIMM) model on medication appropriateness and drug-related hospital revisits. Eur J Clin Pharmacol. 2011;67(7):741-52.
8. Blix HS, Viktil KK, Moger TA, Reikvam A. Characteristics of drug-related problems discussed by hospital pharmacists in multidisciplinary teams. Pharm World Sci. 2006;28(3):152-8.
9. Blix HS, Viktil KK, Reikvam A, Moger TA, Hjemaas BJ, Pretsch P, et al. The majority of hospitalised patients have drug-related problems: results from a prospective study in general hospitals. European journal of clinical pharmacology. 2004;60(9):651-8.
10. Viktil KK, Blix HS, Moger TA, Reikvam A. Interview of patients by pharmacists contributes significantly to the identification of drug-related problems (DRPs). Pharmacoepidemiology and drug safety. 2006;15(9):667-74.
11. Hospital Pharmacies Enterprise, South-Eastern Norway Regional Health Authority. Procedure for medicines reconciliation. Internal document.
12. Hospital Pharmacies Enterprise, South-Eastern Norway Regional Health Authority. Procedure for medicines review. Internal document.
13. Scullin C, Hogg A, Luo R, Scott MG, McElnay JC. Integrated medicines management - can routine implementation improve quality? Journal of evaluation in clinical practice. 2012;18(4):807-15.
14. Eriksson T, Holmdahl L, Bondesson Å, Midlov P, Hoglund P. [Medicine and pharmacy cooperation for more optimal use of drugs: the LIMM-model]. I vården. 2010;9:22-7.
15. Major ALS. Integrated Medicines Management in Central Norway. EJHPPractice. 2011;17(4):10-.
16. Hanlon JT, Schmader KE, Samsa GP, Weinberger M, Uttech KM, Lewis IK, et al. A method for assessing drug therapy appropriateness. Journal of clinical epidemiology. 1992;45(10):1045-51.



## PROTOCOL AMENDMENTS

### June 16<sup>th</sup> 2014

Amendment to “Inclusion criteria”: To count the number of drugs from different ATC groups, all drugs marked as “used before hospital admission”, i.e. marked with “→” on the paper medical record, either by physicians at the internal medicine ward or at another hospital ward which the patient is transferred from, should be included. If the patient is transferred from another hospital ward where drugs used before hospital admission clearly are not written on the paper medical record, e.g. the intensive care unit, number of drugs described in the electrical admission record, should be counted.

### August 15<sup>th</sup> 2014

Amendment to “Inclusion criteria”:

- The patient must have a Norwegian personal identification number (to be able to retrieve readmission data from the Norwegian Patient Registry)

Amendments to “Exclusion criteria”:

- Patients isolated due to severe infections
- Patients with temporary lack of consent due to acute illness, assessed by the responsible ward physician. If the patient have not handled their drugs themselves before hospitalization, and consent can be retrieved from the patients next of kin, the patient may be included.

### June 7<sup>th</sup> 2016

Charlson comorbidity index (CCI) score will be used as the morbidity measure, instead of CIRS.

### April 10<sup>th</sup> 2017

The data collected in the study will be used in additional analysis. The aim is to investigate which patients who will benefit most of the pharmacist intervention, and which patients that have the highest risk of hospital readmissions. We will also investigate the importance of the different components of the intervention. Data from all included patients in both the intervention and the control group will be used to investigate significant explanatory variables for the risk of readmissions.

Candidate variables will consist of both clinical and drug-related variables. A Cox regression analysis will be conducted, with “time to first readmission or death” as dependent variable.

Candidate variables will be:

- Age
- Sex
- Kidney function
- Pharmacogenetic variability in drug metabolizing enzymes
- If the patient is admitted from or discharged to a nursing home or home nurse care
- If the patient receives multidose dispensed drugs

- 1
- 2
- 3 • Length of hospital stay
- 4
- 5 • Charlson Comorbidity Index?
- 6
- 7 • Diagnoses, e.g.
- 8
  - 9 ○ Lung diseases
  - 10 ○ Heart failure
  - 11 ○ Coronary disease
  - 12 ○ Malignant disease
  - 13 ○ Dementia
- 14
- 15 • Drug related variables
- 16
  - 17 ○ Number of drugs at hospital discharge
  - 18 ○ Drugs in different ATC groups
- 19
- 20
- 21
- 22

23 The modelling will start with univariate analysis of all variables which may be associated with time to first  
24 readmission. Explanatory variables with p values < 0.2 will be included in the multivariate analysis. Dependant  
25 on the number of explanatory variables to be included in the multivariate analysis, the variables in the final  
26 model will be decided by 1) forward inclusion of one and one variable or 2) backwards elimination of one and  
27 one variable, until the model consists of only statistically significant variables.

28 To investigate if subgroups of patients have increased effect of the intervention, an interaction term will be  
29 added to the model, the same way as described above.

31 The model will be validated with data collected in a new cohort of patients from the internal medicine ward and  
32 from observational data from other internal medicine wards at hospitals in the South-Eastern Norway Regional  
33 Health Authority.

34 The study is approved with end-date October 31<sup>st</sup> 2017, and storing of data until October 31<sup>st</sup> 2022. Due to the  
35 planned additional analysis, new end-date will be January 1<sup>st</sup> 2020, and data will be stored until January 1<sup>st</sup>  
36 2025.

#### 40 May 22<sup>th</sup> 2018

41 According to the original protocol mortality outcome data would be retrieved 12 months after index hospital  
42 discharge for each patient. Since the inclusion period lasted 1.5 years, followed by time spent on developing of  
43 the research database, we were unable to conduct data analysis before now. The first patient was enrolled August  
44 2014, the last March 2016. Follow-up regarding mortality will be extended to December 31<sup>st</sup> 2017 for all  
45 included patients, to increase statistical power.

#### 48 June 26<sup>th</sup> 2018

49 According to the original protocol readmission outcome data would be retrieved 12 months after index hospital  
50 discharge for each patient. Since the inclusion period lasted 1.5 years, followed by time spent on developing of  
51 the research database, we were unable to conduct data analysis before now. The first patient was enrolled August  
52 2014, the last March 2016. Follow-up regarding readmissions will be extended to December 31<sup>st</sup> 2017 for all  
53 included patients. The primary endpoint will however not be changed, but remain as detailed in the statistical  
54 analysis plan which was signed May 25<sup>th</sup> 2018.

## Statistical analysis plan – Oslo pharmacist intervention study - effect on readmissions (OPERA)

### 1. Introduction

The aim of this study is to investigate the effect of an in-hospital pharmacist intervention in multimorbid patients using at least four drugs. The study is registered in Clinicaltrials.gov (NCT02336113). Some basic elements from the study protocol are recapitulated below. The aim of this document is, prior to the conduction of analysis, to establish a detailed plan for statistical analysis, beyond what is written in the protocol.

#### *Inclusion and exclusion criteria*

Inclusion criteria were age  $\geq 18$  years, Norwegian citizen, unplanned hospitalization, and use of a minimum of four regular drugs at admission. The drugs were required to represent a minimum of two Anatomical Therapeutic Chemical (ATC) groups [1] at 1st level to enrich the inclusion of multimorbid patients.

Patients who were i) terminally ill, ii) isolated due to severe infections or iii) unable to communicate in Norwegian or English and in lack of an interpreter, were excluded. Patients readmitted during the study period were not eligible for a second inclusion. Patients, for whom medicines reconciliation revealed use of less than four regular drugs at admission, were excluded.

#### *Randomization and blinding*

The patients were randomized 1:1 to usual care or pharmacist intervention. Staff at the Centre for Biostatistics and Epidemiology, Oslo University Hospital, was responsible for the randomization procedure. This staff had no contact with the patients, study pharmacists or ward staff. A permuted block randomization was generated and delivered to the study pharmacists in sequentially numbered, opaque, sealed envelopes. Investigators were blinded to block size. In order to minimize the risk of selection bias, the randomization took place after patient inclusion, after baseline assessments were conducted. The randomization envelopes were drawn by one of the study pharmacists after controlling that the envelope with the lowest number was used.

It was not feasible to blind the patients or the study pharmacists. Nor was it feasible to blind ward staff to which patients were allocated to the pharmacist intervention group. The ward staff were however not informed of which patients that were control patients in the study. Data on readmissions were provided by The Norwegian Patient Registry and data on deaths were provided by The Norwegian Cause of Death Registry, by staff blinded for group allocation.

#### *Primary endpoint*

The primary endpoint is difference between the patient groups in time to the first unplanned hospital admission or death within 12 months after index stay discharge.

### ***Secondary endpoints***

Secondary endpoints are differences between the patient groups in:

- Time to the first unplanned readmission within 12 months after index stay discharge (censored for deaths)
- Number of unplanned and planned readmissions per patient, within 30 days, 6 months and 12 months after index discharge
- Proportion of patients unplanned hospitalized within 30 days, 6 months and 12 months after index discharge
- Proportion of patients dead or unplanned hospitalized within 30 days, 6 months and 12 months after index discharge
- Proportion of patients dead within 30 days, 6 months, 12 months and 20 months after index discharge
- Length of hospital stay of the first unplanned readmission
- Total mortality, from index discharge date until 31.12.2017
- Change in Medicines Appropriateness Index (MAI)-score [2] from index hospital admission to index hospital discharge
- Quality of drug discharge information at index hospital discharge

Some of the secondary endpoint analyses may be published in separate papers.

### ***Background variables***

The following background variables have been collected:

- Age
  - Sex
  - Reason for admission
  - Medicine administration assistance prior to admission, and after discharge, i.e. receiving drugs from a home care nurse
  - Living situation prior to admission, and after discharge, i.e. living at home or at a nursing home
  - Diagnoses (ICD-10)
  - Charlson Comorbidity Index Score [3]
  - Last hospital admission, up to 6 months prior to index stay
  - Date for index hospital admission and discharge, hence length of index stay
  - Drugs prior to admission, during hospital stay and at hospital discharge, including posology
  - Drug-related problems at baseline for all included patients
  - Drug related problems during hospital stay for intervention patients
  - Genetic variability in drug metabolizing enzymes
  - Body-mass index
  - Glomerular filtration rate
  - Serum-albumine
  - C reactive protein (CRP)
-

### *Power calculation*

The sample size calculation was based on a previous study on a similar patient population reporting a readmission frequency of 50% in 12 months [4], as well corresponding readmission frequencies for patients discharged from the internal medicine ward (information from South-Eastern Norway Regional Health Authority). It was estimated that to detect a 15% absolute reduction in hospital readmissions with 80% power and a significance level of 5%, we would require 168 patients in each group. To compensate for any drop outs a total of 200 patients in each group were enrolled in the study.

Since a survival analyse utilizes the information better than a comparison of proportions at a given time, the power will be somewhat higher than estimated above.

### *Patient flow*

Patient flow is illustrated in Figure 1. Figure 2 shows a further description of the 200 patients allocated to the pharmacist intervention group.

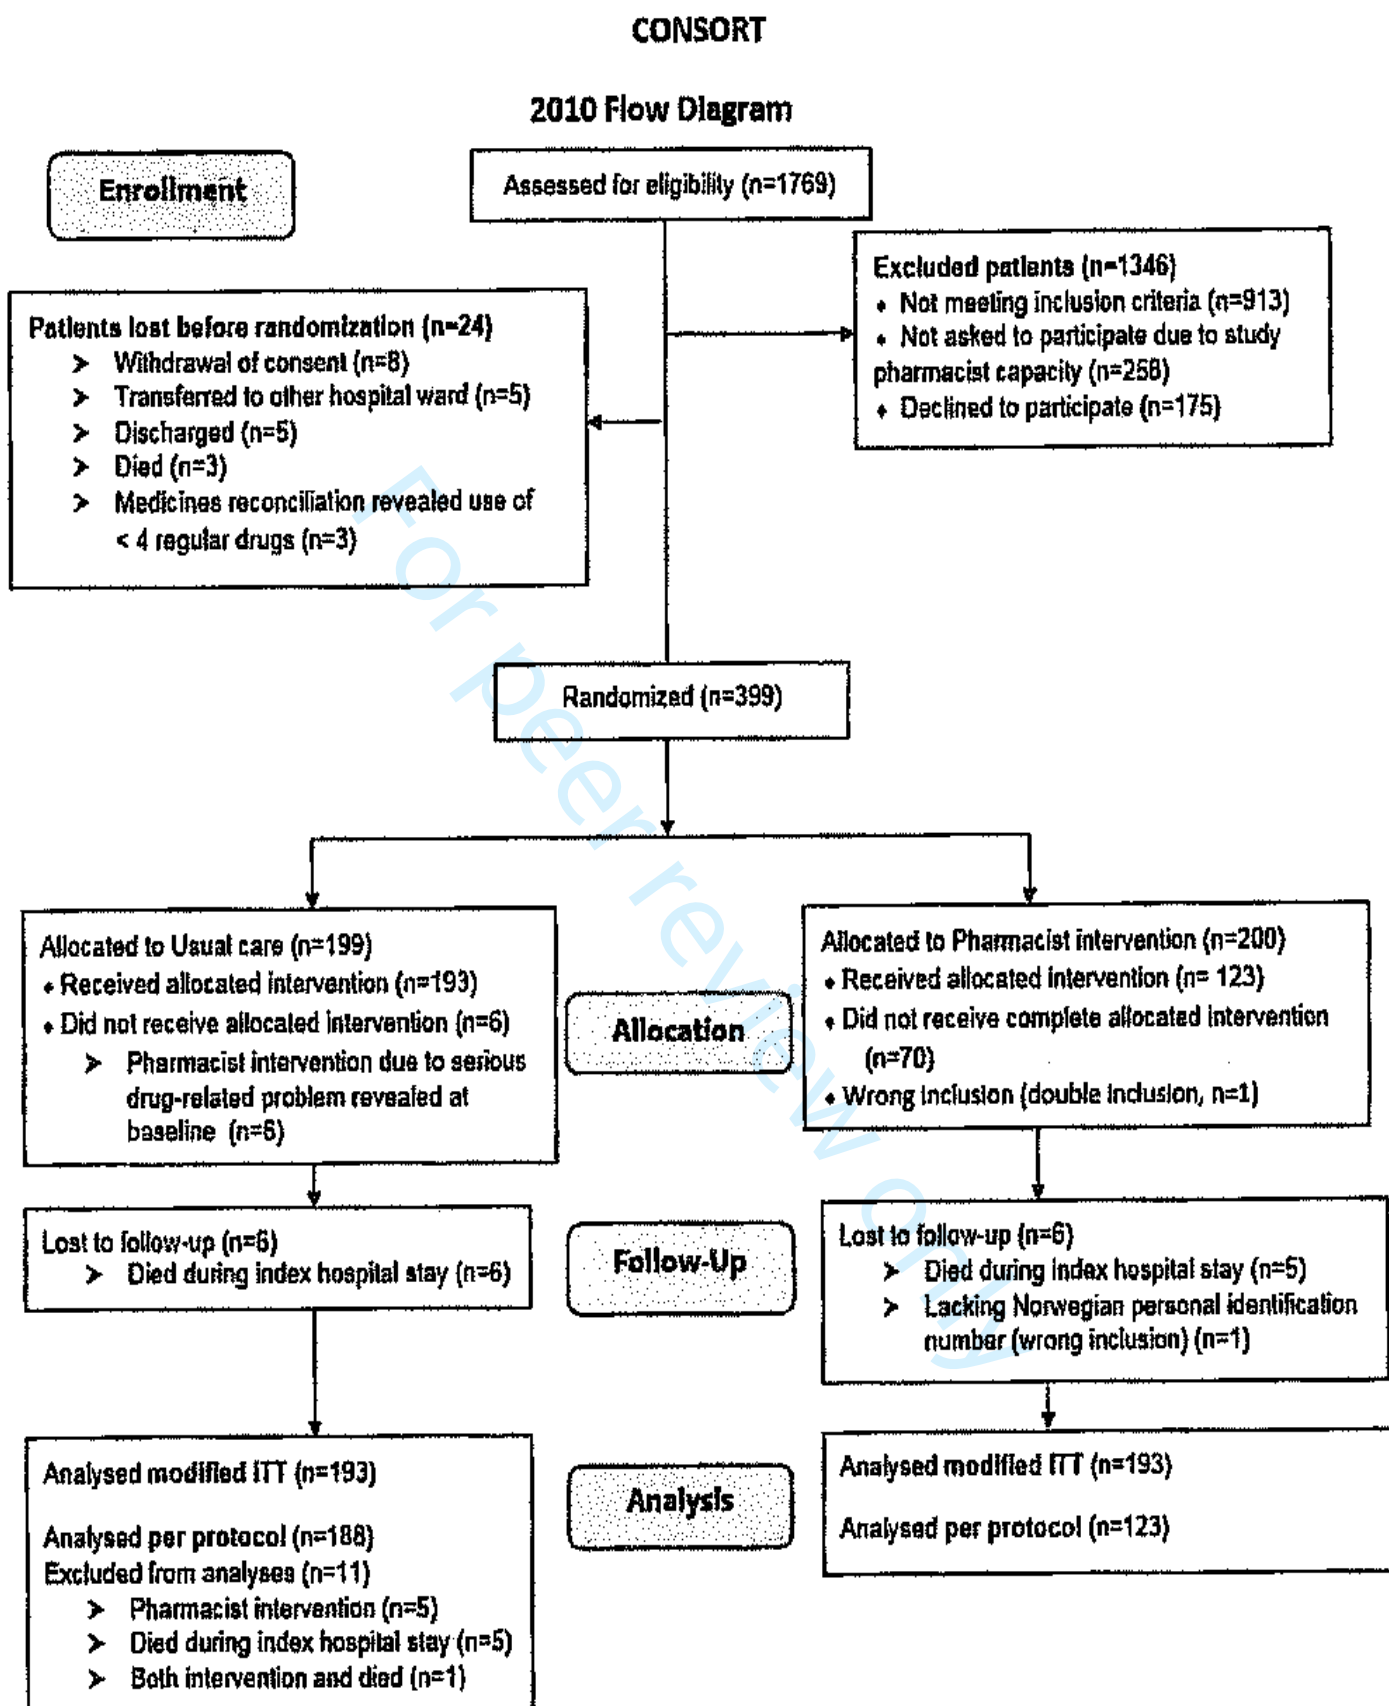

Figure 1. Patient flowchart. ITT = intention to treat.





Figure 2. Flowchart further describing the patients allocated to the pharmacist intervention group. NA = not applicable.

### ***Definition of analysis populations***

The primary efficacy analysis is a modified intention to treat (MITT):

- Patients who died during the index hospital stay were excluded because they never were discharged and at risk for hospital readmissions or death after discharge.
- One patient was lost to follow up due to a lack of Norwegian personal Identification number (wrong inclusion) and was excluded.
- One patient was wrongly included, in terms of being a readmitted patient, already included in the study. The second, wrong inclusion, was excluded. The patient is included in the analysis using data related to the first admission.

A per protocol (PP) analysis consists of patients that received the complete allocated intervention:

- In the control group, for patients with drug related problems revealed at baseline suspected to cause detrimental effects or death if not acted upon, the study pharmacist intervened. These patients were excluded.
- In the pharmacist intervention group, all patients receiving none or only parts of the predefined intervention were excluded.

## **2. Primary endpoint analysis**

The primary endpoint analysis will be done at the MITT population.

The primary endpoint analysis is a time-to-event analysis. The Kaplan Meier method and the log-rank test will be applied. Further, a Cox proportional hazards model will be applied to estimate hazard ratios. A p value below 0.05 will be regarded as statistically significant. Hazard ratios will be presented with 95% confidence intervals. The analysis will be performed in SPSS.

## **3. Handling of protocol violations**

### ***Wrongly included patients (n=2)***

One patient was wrongly included, lacking a Norwegian personal identification number. This identification number is essential to collect information on hospital admissions and death respectively from The Norwegian Patient Registry and The Norwegian Cause of Death Registry. We have therefore chosen to exclude this patient from the analyses.

One patient was wrongly included, in terms of being included in the study earlier, hence the second inclusion actually was a hospital readmission. The second inclusion of the patient is therefore excluded from the analyses.

### ***Patients lost before randomization (n=24)***

A few patients were lost before the randomization took place, due to different reasons listed in Figure 1. These 24 patients are will be excluded from all analyses.



### ***Randomized patients who died during the index hospital stay (n=11)***

Five patients in the intervention group and six patients in the control group died during the index hospital stay. As we defined the start point for the 12 months follow up at hospital discharge, we have chosen to exclude these 11 patients both from the MITT and PP analysis populations.

### ***Patients not handled according to randomisation***

These patients are described under the section *Definition of analysis populations*.

## **4. Handling of missing data**

No missing data on readmissions or mortality is present for the patient population MITT or PP. When data is missing in background variables, results will be presented with specified total number of patients contributing to each variable.

## **5. Sensitivity analysis**

A per protocol analyses will be performed.

## **6. Variables of adjustments**

Since the present study is a randomized controlled trial, there should by default not be done any adjustments. However, if the patients in the control and intervention group turn out to be substantially different in some of the background variables, it will be considered if adjustments have to be made, in additional analyses.

## **7. Secondary endpoint analysis**

Time to the first unplanned hospital readmission within 12 months after index discharge date, censored for deaths, will be analysed with the Kaplan Meier method and the log-rank-test. Hazard ratios with 95% confidence intervals will be estimated using a Cox proportional hazards model.

Total mortality will be analysed as a time-to-event analysis. To exploit the long time period of both inclusion and follow up in the study, all patients will be followed until 31.12.2017 regarding total mortality. The Kaplan Meier method and the log-rank test will be applied. Further, a Cox proportional hazards model will be applied to estimate hazard ratios. Hazard ratios will be presented with 95% confidence intervals.

Continuous variables will be analysed by two-sample t-tests. If extreme outliers are identified, variables will be analysed with the Mann-Whitney test. Proportions will be analysed with the Chi square test.

All analyses will be performed in SPSS. P values below 0.05 will be regarded as statistically significant.

## 8. Blind analysis

The project administrator and PhD student (ML) has been one of the main study pharmacists, as well as building the research database, has in depth knowledge of the data files, and may recognize whether the patient is in the control or intervention group. Neither the main supervisor (LM) nor the statistician (ES) have been involved in data collection, data punching or in preparation of the data files to statistical analyses.

To maintain blind analyses and prevent bias due to the expectations of the project administrator, data analyses on the primary endpoint, will be performed as follows: ML prepares the data files replacing a random letter to patients in the control group and another random letter to the patients in the intervention group. This new allocation code is written and stored safely and not provided to LM or ES. LM and ES receive the dataset with the new code for the allocated group and carry out the primary analysis. When the statistical analysis is finalized, group allocation will be unblinded by ML, with LM and ES present.

## 9. References

1. World Health Organization (WHO) Collaboration Centre for Drug Statistics Methodology, ATC/DDD Index. [cited 2018 03.04]. Available from: [https://www.whocc.no/atc\\_ddd\\_index/](https://www.whocc.no/atc_ddd_index/).
2. Hanlon JT, Schmader KE, Samsa GP, Weinberger M, Uttech KM, Lewis IK, et al. A method for assessing drug therapy appropriateness. *J Clin Epidemiol.* 1992;45(10):1045-51.
3. Charlson ME, Pompei P, Ales KL, MacKenzie CR. A new method of classifying prognostic comorbidity in longitudinal studies: development and validation. *J Chronic Dis.* 1987;40(5):373-83.
4. Scullin C, Scott MG, Hogg A, McElnay JC. An innovative approach to integrated medicines management. *J Eval Clin Pract.* 2007;13(5):781-8.

## 10. Signatures

We hereby vouch for the fidelity of the study to this statistical analysis plan.

Oslo and Trondheim, Norway, 25 th May 2018



**Marianne Lea, MSc, PhD student**

**Project administrator**

**Hospital Pharmacies Enterprise, South Eastern Norway & University of Oslo**



**Eva Skovlund, MSc, PhD**

**Professor of medical statistics**

**Norwegian University of Science and Technology, NTNU**



**Liv Mathiesen, MSc, PhD**

**Associate professor in clinical pharmacy**

**Main supervisor**

**University of Oslo**

### Statistical analysis plan amendment 30<sup>th</sup> May 2018

We discovered that one of the secondary endpoints was not in accordance with a change we made 2<sup>th</sup> May 2018 after discussions with and recommendations from the Norwegian patients registry (NPR). The following secondary endpoint will therefore be changed from:

- Number of unplanned and planned readmissions per patients within 30 days, 6 months and 12 months after index discharge

to:

- Number of unplanned readmissions per patient within 12 months after index discharge

Documentation:

Excerpt of email correspondence with NPR 2<sup>th</sup> May 2018:

---

**Fra:** Marianne Lea [<mailto:mlea10@hotmail.com>]  
**Sendt:** 2. mai 2018 08:50  
**Til:** Trude Solbakken  
**Emne:** Re: SV: SV: [17/20673](#) Søknad om data fra NPR

Hei,

Bra!

Ja, har forstått at dere ikke har data på legevakt/KADer, men at dere hadde info på om sykehusinnleggelsen var akutt eller planlagt? I forhold til reinnleggelser er det akutte innleggelser vi er ute etter, ikke planlagte/elektive.

Hilsen Marianne

2. mai 2018 kl. 08:41 skrev Trude Solbakken  
<[Trude.Solbakken@helseidir.no](mailto:Trude.Solbakken@helseidir.no)>:

Excerpt of letter from (original correspondence 13.12.2017)

Avdeling helseregistre skal motta utvalget fra søker. I forbindelse med gjennomgang av søknaden og dialog med søker (08.12.2017 og 12.12.2017) tas det sikte på at det skal utleveres opplysninger om følgende forhold:

- Tidspunkter for innleggelser og utskrivelser for evt siste sykehusopphold de siste 12 mnd før innleggedatoen i studien
- Antall sykehusinnleggelser de siste 6 månedene før innleggedatoen i studien
- Tidspunkter for innleggelser og utskrivelser for første gjeninnleggelse på sykehus etter utskrivelsesdatoen i studien
- Antall gjeninnleggelser i løpet av 12 måneder etter utskrivelsesdatoen i studien
- Hovedårsak til første gjeninnleggelse
- Antall kontakter med legevakt i løpet av 12 måneder etter utskrivelsesdatoen i studien

Søker er orientert om at det ikke er mulig å skille mellom legevakt og sykehus, men at det finnes informasjon om kontakten/innleggelsen er ø-hjelp eller planlagt.

## TIMELINE OF THE STUDY, MILESTONES

August 15, 2012: Original Trial protocol written

December 20, 2012: Received funding - PhD grant

March 2013 to December 2013: Maternity leave PhD student

January to August 2014 - Practical planning of data inclusion period

May 2014: Necessary approvals obtained

June 2014: Registration of the trial, based on the original trial protocol, in [clinicaltrials.gov](http://clinicaltrials.gov), identifier: NCT02336113. The trial was published on [clinicaltrials.gov](http://clinicaltrials.gov)'s website in January 2015.\*

August 30, 2014: Patient inclusion started

March 17, 2016: Patient inclusion completed

December 31, 2017: Last day of follow-up on readmissions and mortality

June 2017 to May 2018 Application process for outcome data to the Patient Registers\*\*

May 25, 2018: Statistical analysis plan was finalized and signed, hereunder analysis population defined and endpoint analyses detailed

May 29 to June 6, 2018 Outcome data files from Patient registries prepared for analysis

June 8, 2018 Blinded outcome analyses conducted

\* Due to a minor Protocol Registration and Results System (PRS) review comment. However, a clarification in the outcome measure, i.e. that readmission data should be collected from the Norwegian Patient Registry, was the only addition made from the original registration made in June 2014.

\*\*Huge workload at the Registers entails a very long processing time for outcome data.

 CONSORT CHECKLIST
**Table.** CONSORT 2010 Checklist of Information to Include When Reporting a Randomized Trial<sup>a</sup>

| Section and Topic                                    | Item No. | Checklist Item                                                                                                                                                                              | Reported on Page No. |
|------------------------------------------------------|----------|---------------------------------------------------------------------------------------------------------------------------------------------------------------------------------------------|----------------------|
| <b>Title and abstract</b>                            |          |                                                                                                                                                                                             |                      |
|                                                      | 1a       | Identification as a randomized trial in the title                                                                                                                                           |                      |
|                                                      | 1b       | Structured summary of trial design, methods, results, and conclusions (for specific guidance see CONSORT for abstracts)                                                                     |                      |
| <b>Introduction</b>                                  |          |                                                                                                                                                                                             |                      |
| Background and objectives                            | 2a       | Scientific background and explanation of rationale                                                                                                                                          |                      |
|                                                      | 2b       | Specific objectives or hypotheses                                                                                                                                                           |                      |
| <b>Methods</b>                                       |          |                                                                                                                                                                                             |                      |
| Trial design                                         | 3a       | Description of trial design (such as parallel, factorial) including allocation ratio                                                                                                        |                      |
|                                                      | 3b       | Important changes to methods after trial commencement (such as eligibility criteria), with reasons                                                                                          |                      |
| Participants                                         | 4a       | Eligibility criteria for participants                                                                                                                                                       |                      |
|                                                      | 4b       | Settings and locations where the data were collected                                                                                                                                        |                      |
| Interventions                                        | 5        | The interventions for each group with sufficient details to allow replication, including how and when they were actually administered                                                       |                      |
| Outcomes                                             | 6a       | Completely defined prespecified primary and secondary outcome measures, including how and when they were assessed                                                                           |                      |
|                                                      | 6b       | Any changes to trial outcomes after the trial commenced, with reasons                                                                                                                       |                      |
| Sample size                                          | 7a       | How sample size was determined                                                                                                                                                              |                      |
|                                                      | 7b       | When applicable, explanation of any interim analyses and stopping guidelines                                                                                                                |                      |
| Randomization                                        |          |                                                                                                                                                                                             |                      |
| Sequence generation                                  | 8a       | Method used to generate the random allocation sequence                                                                                                                                      |                      |
|                                                      | 8b       | Type of randomization; details of any restriction (such as blocking and block size)                                                                                                         |                      |
| Allocation concealment mechanism                     | 9        | Mechanism used to implement the random allocation sequence (such as sequentially numbered containers), describing any steps taken to conceal the sequence until interventions were assigned |                      |
| Implementation                                       | 10       | Who generated the random allocation sequence, who enrolled participants, and who assigned participants to interventions                                                                     |                      |
| Blinding                                             | 11a      | If done, who was blinded after assignment to interventions (for example, participants, care providers, those assessing outcomes) and how                                                    |                      |
|                                                      | 11b      | If relevant, description of the similarity of interventions                                                                                                                                 |                      |
| Statistical methods                                  | 12a      | Statistical methods used to compare groups for primary and secondary outcomes                                                                                                               |                      |
|                                                      | 12b      | Methods for additional analyses, such as subgroup analyses and adjusted analyses                                                                                                            |                      |
| <b>Results</b>                                       |          |                                                                                                                                                                                             |                      |
| Participant flow (a diagram is strongly recommended) | 13a      | For each group, the numbers of participants who were randomly assigned, received intended treatment, and were analyzed for the primary outcome                                              |                      |
|                                                      | 13b      | For each group, losses and exclusions after randomization, together with reasons                                                                                                            |                      |
| Recruitment                                          | 14a      | Dates defining the periods of recruitment and follow-up                                                                                                                                     |                      |
|                                                      | 14b      | Why the trial ended or was stopped                                                                                                                                                          |                      |
| Baseline data                                        | 15       | A table showing baseline demographic and clinical characteristics for each group                                                                                                            |                      |
| Numbers analyzed                                     | 16       | For each group, number of participants (denominator) included in each analysis and whether the analysis was by original assigned groups                                                     |                      |
| Outcomes and estimation                              | 17a      | For each primary and secondary outcome, results for each group, and the estimated effect size and its precision (such as 95% confidence interval)                                           |                      |
|                                                      | 17b      | For binary outcomes, presentation of both absolute and relative effect sizes is recommended                                                                                                 |                      |
| Ancillary analyses                                   | 18       | Results of any other analyses performed, including subgroup analyses and adjusted analyses, distinguishing prespecified from exploratory                                                    |                      |
| Harms                                                | 19       | All important harms or unintended effects in each group (for specific guidance see CONSORT for harms)                                                                                       |                      |
| <b>Comment</b>                                       |          |                                                                                                                                                                                             |                      |
| Limitations                                          | 20       | Trial limitations, addressing sources of potential bias, imprecision, and, if relevant, multiplicity of analyses                                                                            |                      |
| Generalizability                                     | 21       | Generalizability (external validity, applicability) of the trial findings                                                                                                                   |                      |
| Interpretation                                       | 22       | Interpretation consistent with results, balancing benefits and harms, and considering other relevant evidence                                                                               |                      |
| <b>Other information</b>                             |          |                                                                                                                                                                                             |                      |
| Registration                                         | 23       | Registration number and name of trial registry                                                                                                                                              |                      |
| Protocol                                             | 24       | Where the full trial protocol can be accessed, if available                                                                                                                                 |                      |
| Funding                                              | 25       | Sources of funding and other support (such as supply of drugs), role of funders                                                                                                             |                      |

<sup>a</sup>We strongly recommend reading this statement in conjunction with the CONSORT 2010 Explanation and Elaboration for important clarifications on all the items. If relevant, we also recommend reading CONSORT extensions for cluster randomized trials, noninferiority and equivalence trials, nonpharmacological treatments, herbal interventions, and pragmatic trials. Additional extensions are forthcoming: for those and for up-to-date references relevant to this checklist, see <http://www.consort-statement.org>.



**Number at risk**

|              | 0   | 3   | 6  | 9  | 12 | 15 | 18 | 21 | 24 | 27 | 30 | 33 | 36 | 39 |
|--------------|-----|-----|----|----|----|----|----|----|----|----|----|----|----|----|
| Intervention | 193 | 115 | 97 | 82 | 68 | 53 | 49 | 42 | 37 | 31 | 26 | 15 | 10 | 2  |
| Control      | 193 | 107 | 80 | 69 | 54 | 42 | 40 | 34 | 23 | 13 | 11 | 5  | 3  | 1  |
