# Supplementary figures and images for: Effect of medicines management versus standard care on readmissions in multimorbid patients: a randomised controlled trial
Source: PubMed Central journal article supplement — BMJ Open. 2020 Dec 29;10(12):e041558. doi: 10.1136/bmjopen-2020-041558 (PMC7778779; doi:10.1136/bmjopen-2020-041558), 2020-12-29

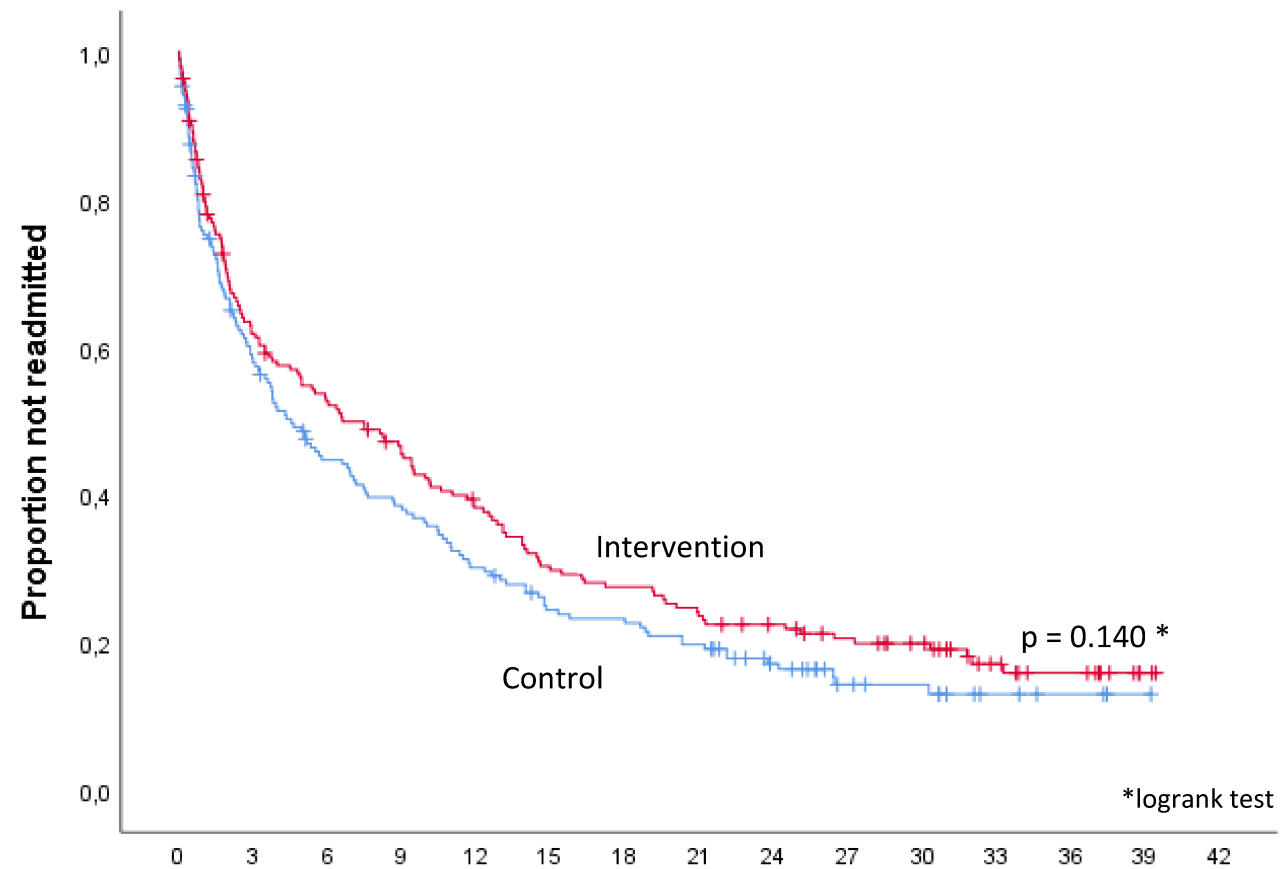

| Number at risk |  | Time since discharge, months |     |    |    |    |    |    |    |    |    |    |    |    |    |
|----------------|--|------------------------------|-----|----|----|----|----|----|----|----|----|----|----|----|----|
|                |  | 0                            | 3   | 6  | 9  | 12 | 15 | 18 | 21 | 24 | 27 | 30 | 33 | 36 | 39 |
| Intervention   |  | 193                          | 115 | 97 | 82 | 68 | 53 | 49 | 42 | 37 | 31 | 26 | 15 | 10 | 2  |
| Control        |  | 193                          | 107 | 80 | 69 | 54 | 42 | 40 | 34 | 23 | 13 | 11 | 5  | 3  | 1  |

Supplement: bmjopen-2020-041558supp003.pdf [file bmjopen-2020-041558supp003.pdf]
